# Supplementary material for: Clinical significance of cyclin-dependent kinase inhibitor 2C expression in cancers: from small cell lung carcinoma to pan-cancers
Source: Springer Nature journal article supplement (doi:10.1186/s12890-022-02036-5), 2022-06-24
Supplement: MOESM3 [file 12890_2022_2036_MOESM3_ESM.pdf]

**A: No CDKN2C expression difference between various SCLC stages (III-IV vs. I-II).**

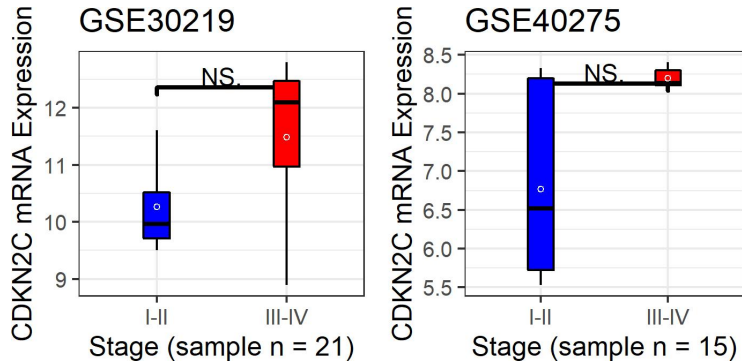

**B: Details of the predicted matched sequence between FOXA1 and CDKN2C.**

| Tool                | TF    | Motif ID | Sequence               | Start | Stop | Strand | Score <sup>a</sup> | p-value | Matched sequence |
|---------------------|-------|----------|------------------------|-------|------|--------|--------------------|---------|------------------|
| JASPAR <sup>b</sup> | FOXA1 | MA0148.4 | chr1:50967831-50968826 | 30    | 41   | +      | 7.25               | /       | TAGAAAACACTT     |
| FIMO <sup>c</sup>   | FOXA1 | MA0148.4 | chr1:50967831-50968826 | 30    | 41   | +      | 6.48               | 0.001   | TAGAAAACACTT     |

Notes: <sup>a</sup>The score for the motif occurrence; <sup>b</sup>JASPAR (2022); <sup>c</sup>Find Individual Motif Occurrences (Version 5.4.1).

**C: The seqlogo of FOXA1 motif within FOXA1 ChIP-Seq peak.**

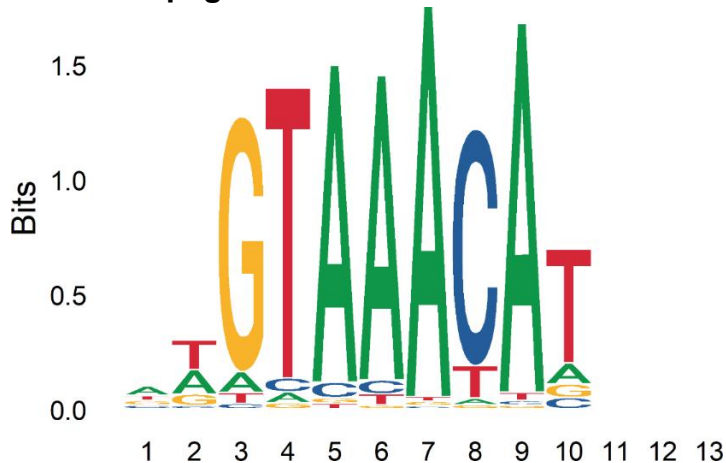

Additional file 3. CDKN2C expression difference between various SCLC stages (pane A), matched sequence of FOXA1 with CDKN2C (pane B), and FOXA1 motif (pane C).
