# Supplementary material for: Clinical significance of cyclin-dependent kinase inhibitor 2C expression in cancers: from small cell lung carcinoma to pan-cancers
Source: BMC Pulm Med. 2022 Jun 24;22:246. doi: 10.1186/s12890-022-02036-5 (PMC9233395; doi:10.1186/s12890-022-02036-5)
Supplement: Supplementary file 2 — Additional file 2: Clinical information of samples included in this study. [file 12890_2022_2036_MOESM2_ESM.xlsx]

## Sheet: Legend
Additional file 2. Clinical information of samples included in this study.

## Sheet: GEO SCLC Samples 
GPL11154	Sample ID	Sample Type	GPL13376	Sample ID	Sample Type	GPL14550	Sample ID	Sample Type	GPL15974	Sample ID	Sample Type	GPL201	Sample ID	Sample Type	GPL23270	Sample ID	Sample Type	GPL570	Sample ID	Sample Type	GPL6884	Sample ID	Sample Type	GPL7015	Sample ID	Sample Type	GPL8300	Sample ID	Sample Type	GPL96	Sample ID	Sample Type	GPL962	Sample ID	Sample Type	GPL97	Sample ID	Sample Type
	B08-3483NA.normal	Non-SCLC		GSM2888648	Non-SCLC		GSM1085593	Non-SCLC		GSM990252	Non-SCLC		GSM140185	Non-SCLC		GSM4504102	Non-SCLC		GSM252799	Non-SCLC		GSM794408	Non-SCLC		GSM303154	Non-SCLC		GSM2196632	Non-SCLC		GSM94309	SCLC		GSM17287	Non-SCLC		GSM108820	Non-SCLC
	B08-3758NA.normal	Non-SCLC		GSM2888649	Non-SCLC		GSM1085594	Non-SCLC		GSM990169	Non-SCLC		GSM140186	Non-SCLC		GSM4504104	Non-SCLC		GSM252800	Non-SCLC		GSM794409	Non-SCLC		GSM303155	Non-SCLC		GSM2196634	Non-SCLC		GSM94310	SCLC		GSM17288	Non-SCLC		GSM108822	Non-SCLC
	B08-4386NA.normal	Non-SCLC		GSM2888650	Non-SCLC		GSM1085595	Non-SCLC		GSM990170	Non-SCLC		GSM140187	Non-SCLC		GSM4504106	Non-SCLC		GSM252801	Non-SCLC		GSM794410	Non-SCLC		GSM303156	Non-SCLC		GSM2196647	Non-SCLC		GSM94311	SCLC		GSM17289	Non-SCLC		GSM108850	Non-SCLC
	B08-4579NA.normal	Non-SCLC		GSM2888659	Non-SCLC		GSM1085596	Non-SCLC		GSM990171	Non-SCLC		GSM140188	Non-SCLC		GSM4504108	Non-SCLC		GSM252802	Non-SCLC		GSM794411	Non-SCLC		GSM303157	Non-SCLC		GSM2196662	Non-SCLC		GSM94312	SCLC		GSM17290	Non-SCLC		GSM108856	Non-SCLC
	N08-3503A.normal	Non-SCLC		GSM2888661	Non-SCLC		GSM1085597	Non-SCLC		GSM990172	Non-SCLC		GSM140189	Non-SCLC		GSM4504110	Non-SCLC		GSM252803	Non-SCLC		GSM794412	Non-SCLC		GSM303158	Non-SCLC		GSM2196670	Non-SCLC		GSM94318	SCLC		GSM17291	Non-SCLC		GSM171877	Non-SCLC
	N08-3758A.normal	Non-SCLC		GSM2888663	Non-SCLC		GSM1085598	Non-SCLC		GSM990173	Non-SCLC		GSM140176	SCLC		GSM4504112	Non-SCLC		GSM252804	Non-SCLC		GSM794413	Non-SCLC		GSM303145	SCLC		GSM2196693	Non-SCLC		GSM94320	SCLC		GSM17292	Non-SCLC		GSM171837	Non-SCLC
	N08-4497A.normal	Non-SCLC		GSM2888665	Non-SCLC		GSM1085599	Non-SCLC		GSM990174	Non-SCLC		GSM140177	SCLC		GSM4504114	Non-SCLC		GSM252805	Non-SCLC		GSM794414	Non-SCLC		GSM303146	SCLC		GSM2196708	Non-SCLC		GSM94321	SCLC		GSM17293	Non-SCLC		GSM171909	Non-SCLC
	11A	SCLC		GSM2888667	Non-SCLC		GSM1085604	SCLC		GSM990175	Non-SCLC		GSM140178	SCLC		GSM4504116	Non-SCLC		GSM252806	Non-SCLC		GSM794415	Non-SCLC		GSM303147	SCLC		GSM2196711	Non-SCLC		GSM94322	SCLC		GSM17294	Non-SCLC		GSM171911	Non-SCLC
	12A	SCLC		GSM2888669	Non-SCLC		GSM1085605	SCLC		GSM990176	Non-SCLC		GSM140179	SCLC		GSM4504118	Non-SCLC		GSM252807	Non-SCLC		GSM794416	Non-SCLC		GSM303148	SCLC		GSM2196717	Non-SCLC		GSM94330	SCLC		GSM17295	Non-SCLC		GSM108824	SCLC
	13A	SCLC		GSM2888683	Non-SCLC		GSM1085606	SCLC		GSM990177	Non-SCLC		GSM140180	SCLC		GSM4504120	Non-SCLC		GSM252808	Non-SCLC		GSM794417	Non-SCLC		GSM303149	SCLC		GSM2196726	Non-SCLC		GSM94331	SCLC		GSM17296	Non-SCLC		GSM171841	SCLC
	14A	SCLC		GSM2888670	SCLC		GSM1085607	SCLC		GSM990178	Non-SCLC		GSM140181	SCLC		GSM4504122	Non-SCLC		GSM252809	Non-SCLC		GSM794418	Non-SCLC		GSM303150	SCLC		GSM2196777	Non-SCLC		GSM108819	Non-SCLC		GSM17297	Non-SCLC		GSM171843	SCLC
	15A	SCLC		GSM2888671	SCLC		GSM1085600	NSCLC		GSM990179	Non-SCLC		GSM140182	SCLC		GSM4504124	Non-SCLC		GSM252810	Non-SCLC		GSM794419	Non-SCLC		GSM303151	SCLC		GSM2196788	Non-SCLC		GSM108821	Non-SCLC		GSM17298	Non-SCLC		GSM171845	SCLC
	16A	SCLC		GSM2888672	SCLC		GSM1085601	NSCLC		GSM990180	Non-SCLC		GSM140183	SCLC		GSM4504126	Non-SCLC		GSM252811	Non-SCLC		GSM794420	Non-SCLC		GSM303152	SCLC		GSM2196822	Non-SCLC		GSM108849	Non-SCLC		GSM17299	Non-SCLC		GSM171847	SCLC
	17A	SCLC		GSM2888673	SCLC		GSM1085602	NSCLC		GSM990181	Non-SCLC		GSM140184	SCLC		GSM4504128	Non-SCLC		GSM252812	Non-SCLC		GSM794421	Non-SCLC		GSM303153	SCLC		GSM2196824	Non-SCLC		GSM108855	Non-SCLC		GSM17300	Non-SCLC		GSM171851	SCLC
	18A	SCLC		GSM2888674	SCLC		GSM1085603	NSCLC		GSM990182	Non-SCLC		GSM140166	NSCLC		GSM4504130	Non-SCLC		GSM252813	Non-SCLC		GSM794422	Non-SCLC		GSM302996	NSCLC		GSM2196853	Non-SCLC		GSM171876	Non-SCLC		GSM17301	Non-SCLC		GSM171853	SCLC
	20A	SCLC		GSM2888675	SCLC					GSM990183	Non-SCLC		GSM140167	NSCLC		GSM4504132	Non-SCLC		GSM252814	Non-SCLC		GSM794423	Non-SCLC		GSM302997	NSCLC		GSM2196857	Non-SCLC		GSM171836	Non-SCLC		GSM17302	Non-SCLC		GSM171857	SCLC
	21A	SCLC		GSM2888676	SCLC					GSM990184	Non-SCLC		GSM140168	NSCLC		GSM4504134	Non-SCLC		GSM252815	Non-SCLC		GSM794424	Non-SCLC		GSM302998	NSCLC		GSM2196861	Non-SCLC		GSM171908	Non-SCLC		GSM17303	Non-SCLC		GSM171859	SCLC
	22A	SCLC		GSM2888677	SCLC					GSM990185	Non-SCLC		GSM140169	NSCLC		GSM4504136	Non-SCLC		GSM252816	Non-SCLC		GSM794425	Non-SCLC		GSM302999	NSCLC		GSM2196619	SCLC		GSM171910	Non-SCLC		GSM17304	Non-SCLC		GSM171861	SCLC
	23A	SCLC		GSM2888678	SCLC					GSM990186	Non-SCLC		GSM140170	NSCLC		GSM4504101	SCLC		GSM252817	Non-SCLC		GSM794426	Non-SCLC		GSM303000	NSCLC		GSM2196690	SCLC		GSM108823	SCLC		GSM17305	Non-SCLC		GSM171863	SCLC
	25A	SCLC		GSM2888679	SCLC					GSM990187	Non-SCLC		GSM140171	NSCLC		GSM4504103	SCLC		GSM252818	Non-SCLC		GSM794427	Non-SCLC		GSM303001	NSCLC		GSM2196725	SCLC		GSM171840	SCLC		GSM17195	SCLC		GSM171865	SCLC
	26A	SCLC		GSM2888680	SCLC					GSM990188	Non-SCLC		GSM140172	NSCLC		GSM4504105	SCLC		GSM252819	Non-SCLC		GSM794428	Non-SCLC		GSM303002	NSCLC		GSM2196732	SCLC		GSM171842	SCLC		GSM17196	SCLC		GSM171867	SCLC
	27A	SCLC		GSM2888681	SCLC					GSM990189	Non-SCLC		GSM140173	NSCLC		GSM4504107	SCLC		GSM252820	Non-SCLC		GSM794429	Non-SCLC		GSM303003	NSCLC		GSM2196801	SCLC		GSM171844	SCLC		GSM17306	SCLC		GSM171873	SCLC
	28A	SCLC		Lu-278-TC	NSCLC					GSM990190	Non-SCLC		GSM140174	NSCLC		GSM4504109	SCLC		GSM252821	Non-SCLC		GSM794430	Non-SCLC		GSM303004	NSCLC		GSM2196806	SCLC		GSM171846	SCLC		GSM17307	SCLC		GSM171879	SCLC
	29A	SCLC		Lu-421-TC	NSCLC					GSM990191	Non-SCLC		GSM140175	NSCLC		GSM4504111	SCLC		GSM252822	Non-SCLC		GSM794431	Non-SCLC		GSM303005	NSCLC		GSM2196610	NSCLC		GSM171850	SCLC		GSM17308	SCLC		GSM171881	SCLC
	30A	SCLC		Lu-553A-TC	NSCLC					GSM990192	Non-SCLC		GSM140190	NSCLC		GSM4504113	SCLC		GSM252823	Non-SCLC		GSM794432	Non-SCLC		GSM303006	NSCLC		GSM2196611	NSCLC		GSM171852	SCLC		GSM17309	SCLC		GSM171883	SCLC
	31A	SCLC		Lu-710-TC	NSCLC					GSM990193	Non-SCLC		GSM140191	NSCLC		GSM4504115	SCLC		GSM252824	Non-SCLC		GSM794433	Non-SCLC		GSM303007	NSCLC		GSM2196612	NSCLC		GSM171856	SCLC		GSM17310	SCLC		GSM171887	SCLC
	32A	SCLC		Lu-1567-TC	NSCLC					GSM990194	Non-SCLC		GSM140192	NSCLC		GSM4504117	SCLC		GSM252825	Non-SCLC		GSM794434	Non-SCLC		GSM303008	NSCLC		GSM2196613	NSCLC		GSM171858	SCLC		GSM17311	SCLC		GSM171889	SCLC
	33A	SCLC		Lu-245A-TC	NSCLC					GSM990195	Non-SCLC		GSM140194	NSCLC		GSM4504119	SCLC		GSM252826	Non-SCLC		GSM794435	Non-SCLC		GSM303009	NSCLC		GSM2196614	NSCLC		GSM171860	SCLC		GSM17312	SCLC		GSM171891	SCLC
	34A	SCLC		Lu-1005-TC	NSCLC					GSM990196	Non-SCLC		GSM140195	NSCLC		GSM4504121	SCLC		GSM252827	Non-SCLC		GSM794436	Non-SCLC		GSM303010	NSCLC		GSM2196615	NSCLC		GSM171862	SCLC		GSM17313	SCLC		GSM171905	SCLC
	36A	SCLC		Lu-1768-TC	NSCLC					GSM990197	Non-SCLC		GSM140196	NSCLC		GSM4504123	SCLC		GSM252855	Non-SCLC		GSM794437	Non-SCLC		GSM303011	NSCLC		GSM2196616	NSCLC		GSM171864	SCLC		GSM17314	SCLC		GSM171907	SCLC
	3A	SCLC		Lu-348-TC	NSCLC					GSM990198	Non-SCLC		GSM140197	NSCLC		GSM4504125	SCLC		GSM252856	Non-SCLC		GSM794438	Non-SCLC		GSM303012	NSCLC		GSM2196617	NSCLC		GSM171866	SCLC		GSM17335	SCLC
	4A	SCLC		Lu-564-TC	NSCLC					GSM990199	Non-SCLC		GSM140198	NSCLC		GSM4504127	SCLC		GSM252857	Non-SCLC		GSM794439	Non-SCLC		GSM303013	NSCLC		GSM2196618	NSCLC		GSM171872	SCLC		GSM17336	SCLC
	5A	SCLC		Lu-1752-TC	NSCLC					GSM990200	Non-SCLC		GSM140200	NSCLC		GSM4504129	SCLC		GSM252858	Non-SCLC		GSM794440	Non-SCLC		GSM303014	NSCLC		GSM2196620	NSCLC		GSM171878	SCLC		GSM17337	SCLC
	6A	SCLC		Lu-383-TC	NSCLC					GSM990201	Non-SCLC		GSM140201	NSCLC		GSM4504131	SCLC		GSM252859	Non-SCLC		GSM794441	Non-SCLC		GSM303015	NSCLC		GSM2196621	NSCLC		GSM171880	SCLC		GSM17338	SCLC
	7A	SCLC		Lu-302-TC	NSCLC					GSM990202	Non-SCLC		GSM140207	NSCLC		GSM4504133	SCLC		GSM252860	Non-SCLC		GSM794442	Non-SCLC		GSM303016	NSCLC		GSM2196622	NSCLC		GSM171882	SCLC		GSM17339	SCLC
	8A	SCLC		Lu-349-TC	NSCLC					GSM990203	Non-SCLC		GSM140209	NSCLC		GSM4504135	SCLC		GSM252861	Non-SCLC		GSM794443	Non-SCLC		GSM303017	NSCLC		GSM2196623	NSCLC		GSM171886	SCLC		GSM17340	SCLC
	9A	SCLC		Lu-509-TC	NSCLC					GSM990204	Non-SCLC		GSM140212	NSCLC					GSM252862	Non-SCLC		GSM794444	Non-SCLC		GSM303018	NSCLC		GSM2196624	NSCLC		GSM171888	SCLC		GSM17341	SCLC
	B07-3747A	SCLC		Lu-558-TC	NSCLC					GSM990208	Non-SCLC		GSM140214	NSCLC					GSM252863	Non-SCLC		GSM794445	Non-SCLC		GSM303019	NSCLC		GSM2196625	NSCLC		GSM171890	SCLC		GSM17342	SCLC
	B08-3085A	SCLC		Lu-938-TC	NSCLC					GSM990209	Non-SCLC		GSM140215	NSCLC					GSM252864	Non-SCLC		GSM794446	Non-SCLC		GSM303020	NSCLC		GSM2196626	NSCLC		GSM171904	SCLC		GSM17343	SCLC
	B08-3256TA	SCLC		Lu-820-TC	NSCLC					GSM990210	Non-SCLC		GSM140216	NSCLC					GSM252865	Non-SCLC		GSM794447	Non-SCLC		GSM303021	NSCLC		GSM2196627	NSCLC		GSM171906	SCLC		GSM17344	SCLC
	B08-3483TA	SCLC		Lu-866-TC	NSCLC					GSM990228	Non-SCLC		GSM140217	NSCLC					GSM252866	Non-SCLC		GSM794448	Non-SCLC		GSM303022	NSCLC		GSM2196628	NSCLC		GSM108799	NSCLC		GSM17345	SCLC
	B08-3503TA	SCLC		Lu-993-TC	NSCLC					GSM990229	Non-SCLC		GSM140218	NSCLC					GSM252867	Non-SCLC		GSM794449	Non-SCLC		GSM303023	NSCLC		GSM2196629	NSCLC		GSM108801	NSCLC		GSM17346	SCLC
	B08-3699TA	SCLC		Lu-1315-TC	NSCLC					GSM990230	Non-SCLC		GSM140219	NSCLC					GSM252868	Non-SCLC		GSM794450	Non-SCLC		GSM303024	NSCLC		GSM2196630	NSCLC		GSM108803	NSCLC		GSM17347	SCLC
	B08-3758TA	SCLC		Lu-1420-TC	NSCLC					GSM990205	SCLC		GSM140220	NSCLC					GSM252869	Non-SCLC		GSM794451	Non-SCLC		GSM303025	NSCLC		GSM2196631	NSCLC		GSM108805	NSCLC		GSM17348	SCLC
	B08-4286TA	SCLC		Lu-1466-TC	NSCLC					GSM990206	SCLC		GSM140221	NSCLC					GSM252870	Non-SCLC		GSM794452	Non-SCLC		GSM303026	NSCLC		GSM2196633	NSCLC		GSM108807	NSCLC		GSM17349	SCLC
	B08-4386TA	SCLC		Lu-1615-TC	NSCLC					GSM990207	SCLC								GSM252871	Non-SCLC		GSM794453	Non-SCLC		GSM303027	NSCLC		GSM2196635	NSCLC		GSM108809	NSCLC		GSM16557	NSCLC
	B08-4454TA	SCLC		Lu-748-AC	NSCLC					GSM990211	SCLC								GSM252872	Non-SCLC		GSM794454	Non-SCLC		GSM303028	NSCLC		GSM2196636	NSCLC		GSM108811	NSCLC		GSM16558	NSCLC
	B08-4497TA	SCLC		Lu-1184-AC	NSCLC					GSM990212	SCLC								GSM252873	Non-SCLC		GSM794455	Non-SCLC		GSM303029	NSCLC		GSM2196637	NSCLC		GSM108813	NSCLC		GSM16559	NSCLC
	B08-4579TA	SCLC		Lu-511-AC	NSCLC					GSM990213	SCLC								GSM252874	Non-SCLC		GSM794456	Non-SCLC		GSM303030	NSCLC		GSM2196638	NSCLC		GSM108815	NSCLC		GSM16560	NSCLC
	B09-450A	SCLC		Lu-876-AC	NSCLC					GSM990219	SCLC								GSM252875	Non-SCLC		GSM794457	Non-SCLC		GSM303031	NSCLC		GSM2196639	NSCLC		GSM108817	NSCLC		GSM16561	NSCLC
	B10-144A	SCLC		Lu-1299-AC	NSCLC					GSM990220	SCLC								GSM252876	Non-SCLC		GSM794458	Non-SCLC		GSM303032	NSCLC		GSM2196640	NSCLC		GSM108819	NSCLC		GSM16562	NSCLC
	B10-158A	SCLC		Lu-1655-AC	NSCLC					GSM990221	SCLC								GSM252877	Non-SCLC		GSM794459	Non-SCLC		GSM303033	NSCLC		GSM2196641	NSCLC		GSM108821	NSCLC		GSM16563	NSCLC
	B10-1708A	SCLC		Lu-1354-AC	NSCLC					GSM990222	SCLC								GSM252878	Non-SCLC		GSM794460	Non-SCLC		GSM303034	NSCLC		GSM2196642	NSCLC		GSM108827	NSCLC		GSM16564	NSCLC
	B10-183A	SCLC		Lu1808-AC	NSCLC					GSM990223	SCLC								GSM252879	Non-SCLC		GSM794461	Non-SCLC		GSM303035	NSCLC		GSM2196643	NSCLC		GSM108829	NSCLC		GSM16565	NSCLC
	B10-2275A	SCLC		Lu2004-AC	NSCLC					GSM990224	SCLC								GSM252880	Non-SCLC		GSM794462	Non-SCLC		GSM303036	NSCLC		GSM2196644	NSCLC		GSM108831	NSCLC		GSM16566	NSCLC
	B10-3353A	SCLC		Lu2027-TC	NSCLC					GSM990231	SCLC								GSM252881	Non-SCLC		GSM794463	Non-SCLC		GSM303037	NSCLC		GSM2196645	NSCLC		GSM108833	NSCLC		GSM16567	NSCLC
	B10-3514A	SCLC		Lu2046-AC	NSCLC					GSM990232	SCLC								GSM252882	Non-SCLC		GSM794464	Non-SCLC		GSM303038	NSCLC		GSM2196646	NSCLC		GSM108835	NSCLC		GSM16568	NSCLC
	B10-363A	SCLC		Lu2093-TC	NSCLC					GSM990233	SCLC								GSM252883	Non-SCLC		GSM794465	Non-SCLC		GSM303039	NSCLC		GSM2196648	NSCLC		GSM108837	NSCLC		GSM17315	NSCLC
	B10-3851A	SCLC		Lu2119-TC	NSCLC					GSM990217	NSCLC								GSM252884	Non-SCLC		GSM794466	Non-SCLC		GSM303040	NSCLC		GSM2196649	NSCLC		GSM108839	NSCLC		GSM17316	NSCLC
	B10-4161A	SCLC		Lu2200-AC	NSCLC					GSM990218	NSCLC								GSM252885	Non-SCLC		GSM794269	SCLC		GSM303041	NSCLC		GSM2196650	NSCLC		GSM108841	NSCLC		GSM17317	NSCLC
	B10-4914A	SCLC		Lu2350-TC	NSCLC					GSM990234	NSCLC								GSM101096	Non-SCLC		GSM794270	SCLC		GSM303042	NSCLC		GSM2196651	NSCLC		GSM108843	NSCLC		GSM17318	NSCLC
	B10-5116A	SCLC		Lu2082-TC	NSCLC					GSM990235	NSCLC								GSM101097	Non-SCLC		GSM794272	SCLC		GSM303043	NSCLC		GSM2196652	NSCLC		GSM108845	NSCLC		GSM17319	NSCLC
	B10-5210A	SCLC		Lu2052-TC	NSCLC					GSM990236	NSCLC								GSM101098	Non-SCLC		GSM794273	SCLC		GSM303044	NSCLC		GSM2196653	NSCLC		GSM108847	NSCLC		GSM17320	NSCLC
	B10-5295A	SCLC		Lu2268-TC	NSCLC					GSM990237	NSCLC								GSM101100	Non-SCLC		GSM794275	SCLC		GSM303045	NSCLC		GSM2196654	NSCLC		GSM108849	NSCLC		GSM17321	NSCLC
	B10-5346A	SCLC								GSM990238	NSCLC								GSM101101	Non-SCLC		GSM794276	SCLC		GSM303046	NSCLC		GSM2196655	NSCLC		GSM108851	NSCLC		GSM17322	NSCLC
	B10-5484A	SCLC								GSM990239	NSCLC								GSM101102	Non-SCLC		GSM794277	SCLC		GSM303047	NSCLC		GSM2196656	NSCLC		GSM108853	NSCLC		GSM17323	NSCLC
	B10-5656A	SCLC								GSM990240	NSCLC								GSM101103	Non-SCLC		GSM794279	SCLC		GSM303048	NSCLC		GSM2196657	NSCLC		GSM108855	NSCLC		GSM17324	NSCLC
	B10-5716A	SCLC								GSM990241	NSCLC								GSM101104	Non-SCLC		GSM794284	SCLC		GSM303049	NSCLC		GSM2196658	NSCLC		GSM108857	NSCLC		GSM17325	NSCLC
	B10-6017A	SCLC								GSM990242	NSCLC								GSM101105	Non-SCLC		GSM794286	SCLC		GSM303050	NSCLC		GSM2196659	NSCLC		GSM108859	NSCLC		GSM17326	NSCLC
	B10-6122A	SCLC								GSM990243	NSCLC								GSM101106	Non-SCLC		GSM794289	SCLC		GSM303051	NSCLC		GSM2196660	NSCLC		GSM108861	NSCLC		GSM17327	NSCLC
	B11-1085A	SCLC								GSM990244	NSCLC								GSM101107	Non-SCLC		GSM794292	SCLC		GSM303052	NSCLC		GSM2196661	NSCLC		GSM108863	NSCLC		GSM17328	NSCLC
	B11-2810A	SCLC								GSM990245	NSCLC								GSM101111	Non-SCLC		GSM794293	SCLC		GSM303053	NSCLC		GSM2196663	NSCLC		GSM108865	NSCLC		GSM17329	NSCLC
	B11-283A	SCLC								GSM990246	NSCLC								GSM101113	Non-SCLC		GSM794300	SCLC		GSM303054	NSCLC		GSM2196664	NSCLC		GSM108867	NSCLC		GSM17330	NSCLC
	B11-4430A	SCLC								GSM990248	NSCLC								GSM101114	Non-SCLC		GSM794303	SCLC		GSM303055	NSCLC		GSM2196665	NSCLC		GSM108869	NSCLC		GSM17331	NSCLC
	B11-4A	SCLC								GSM990249	NSCLC								GSM101115	Non-SCLC		GSM794304	SCLC		GSM303056	NSCLC		GSM2196666	NSCLC		GSM108871	NSCLC		GSM17332	NSCLC
	B12-1353A	SCLC								GSM990250	NSCLC								GSM101116	Non-SCLC		GSM794305	SCLC		GSM303057	NSCLC		GSM2196667	NSCLC		GSM108873	NSCLC		GSM17333	NSCLC
	B12-1662A	SCLC								GSM990251	NSCLC								GSM114089	Non-SCLC		GSM794309	SCLC		GSM303058	NSCLC		GSM2196668	NSCLC		GSM108875	NSCLC		GSM17334	NSCLC
	B12-2013A	SCLC																	GSM114090	Non-SCLC		GSM794310	SCLC		GSM303059	NSCLC		GSM2196669	NSCLC		GSM108877	NSCLC		GSM17350	NSCLC
	B12-703A	SCLC																	GSM190149	Non-SCLC		GSM794317	SCLC		GSM303060	NSCLC		GSM2196671	NSCLC		GSM108879	NSCLC		GSM17351	NSCLC
	B12-738A	SCLC																	GSM190150	Non-SCLC		GSM794322	SCLC		GSM303061	NSCLC		GSM2196672	NSCLC		GSM108881	NSCLC		GSM17352	NSCLC
	B12-814A	SCLC																	GSM190151	Non-SCLC		GSM794327	SCLC		GSM303062	NSCLC		GSM2196673	NSCLC		GSM108883	NSCLC		GSM17353	NSCLC
	T10-5656A	SCLC																	GSM190153	Non-SCLC		GSM794352	SCLC		GSM303063	NSCLC		GSM2196674	NSCLC		GSM108885	NSCLC		GSM17354	NSCLC
	T11-4067A	SCLC																	GSM190154	Non-SCLC		GSM794355	SCLC		GSM303064	NSCLC		GSM2196675	NSCLC		GSM171838	NSCLC		GSM17355	NSCLC
	T11-548A	SCLC																	GSM190155	Non-SCLC		GSM794357	SCLC		GSM303065	NSCLC		GSM2196676	NSCLC		GSM171848	NSCLC		GSM17356	NSCLC
	T12-1866A	SCLC																	GSM190156	Non-SCLC		GSM794359	SCLC		GSM303066	NSCLC		GSM2196677	NSCLC		GSM171854	NSCLC		GSM18306	NSCLC
	T12-3716A	SCLC																	GSM254149	Non-SCLC		GSM794360	SCLC		GSM303067	NSCLC		GSM2196678	NSCLC		GSM171868	NSCLC		GSM18307	NSCLC
	LA_P5_1	Non-SCLC																	GSM254150	Non-SCLC		GSM794373	SCLC		GSM303068	NSCLC		GSM2196679	NSCLC		GSM171870	NSCLC		GSM18308	NSCLC
	LA_P5_2	Non-SCLC																	GSM254151	Non-SCLC		GSM794383	SCLC		GSM303069	NSCLC		GSM2196680	NSCLC		GSM171874	NSCLC		GSM18309	NSCLC
	LA_P5_3	Non-SCLC																	GSM254152	Non-SCLC		GSM794260	NSCLC		GSM303070	NSCLC		GSM2196681	NSCLC		GSM171876	NSCLC		GSM18310	NSCLC
	LA_P10_1	Non-SCLC																	GSM254157	Non-SCLC		GSM794262	NSCLC		GSM303071	NSCLC		GSM2196682	NSCLC		GSM171884	NSCLC
	LA_P10_2	Non-SCLC																	GSM254158	Non-SCLC		GSM794263	NSCLC		GSM303072	NSCLC		GSM2196683	NSCLC		GSM171898	NSCLC
	LA_P10_3	Non-SCLC																	GSM254159	Non-SCLC		GSM794264	NSCLC		GSM303073	NSCLC		GSM2196684	NSCLC		GSM171900	NSCLC
	LA_P6_1	Non-SCLC																	GSM254160	Non-SCLC		GSM794265	NSCLC		GSM303074	NSCLC		GSM2196685	NSCLC		GSM171902	NSCLC
	LA_P6_2	Non-SCLC																	GSM254161	Non-SCLC		GSM794266	NSCLC		GSM303075	NSCLC		GSM2196686	NSCLC		GSM94303	NSCLC
	LA_P6_3	Non-SCLC																	GSM298219	Non-SCLC		GSM794267	NSCLC		GSM303076	NSCLC		GSM2196687	NSCLC		GSM94304	NSCLC
	SA_P10_1	Non-SCLC																	GSM298220	Non-SCLC		GSM794271	NSCLC		GSM303077	NSCLC		GSM2196688	NSCLC		GSM94305	NSCLC
	SA_P10_2	Non-SCLC																	GSM298221	Non-SCLC		GSM794274	NSCLC		GSM303078	NSCLC		GSM2196689	NSCLC		GSM94306	NSCLC
	SA_P10_3	Non-SCLC																	GSM298222	Non-SCLC		GSM794282	NSCLC		GSM303079	NSCLC		GSM2196691	NSCLC		GSM94307	NSCLC
	SA_P6_1	Non-SCLC																	GSM298223	Non-SCLC		GSM794283	NSCLC		GSM303080	NSCLC		GSM2196692	NSCLC		GSM94308	NSCLC
	SA_P6_2	Non-SCLC																	GSM298224	Non-SCLC		GSM794285	NSCLC		GSM303081	NSCLC		GSM2196694	NSCLC		GSM94313	NSCLC
	SA_P6_3	Non-SCLC																	GSM298225	Non-SCLC		GSM794287	NSCLC		GSM303082	NSCLC		GSM2196695	NSCLC		GSM94314	NSCLC
	SA_P9_1	Non-SCLC																	GSM298226	Non-SCLC		GSM794288	NSCLC		GSM303083	NSCLC		GSM2196696	NSCLC		GSM94315	NSCLC
	SA_P9_2	Non-SCLC																	GSM298227	Non-SCLC		GSM794290	NSCLC		GSM303084	NSCLC		GSM2196697	NSCLC		GSM94316	NSCLC
	SA_P9_3	Non-SCLC																	GSM298228	Non-SCLC		GSM794291	NSCLC		GSM303085	NSCLC		GSM2196698	NSCLC		GSM94317	NSCLC
																			GSM298229	Non-SCLC		GSM794294	NSCLC		GSM303086	NSCLC		GSM2196699	NSCLC		GSM94319	NSCLC
																			GSM298230	Non-SCLC		GSM794295	NSCLC		GSM303087	NSCLC		GSM2196700	NSCLC		GSM94323	NSCLC
																			GSM298231	Non-SCLC		GSM794296	NSCLC		GSM303088	NSCLC		GSM2196701	NSCLC		GSM94324	NSCLC
																			GSM298232	Non-SCLC		GSM794297	NSCLC		GSM303089	NSCLC		GSM2196702	NSCLC		GSM94325	NSCLC
																			GSM298233	Non-SCLC		GSM794298	NSCLC		GSM303108	NSCLC		GSM2196703	NSCLC		GSM94326	NSCLC
																			GSM298234	Non-SCLC		GSM794299	NSCLC		GSM303109	NSCLC		GSM2196704	NSCLC		GSM94327	NSCLC
																			GSM298235	Non-SCLC		GSM794301	NSCLC		GSM303090	NSCLC		GSM2196705	NSCLC		GSM94328	NSCLC
																			GSM298236	Non-SCLC		GSM794302	NSCLC		GSM303091	NSCLC		GSM2196706	NSCLC		GSM94329	NSCLC
																			GSM298237	Non-SCLC		GSM794306	NSCLC		GSM303092	NSCLC		GSM2196707	NSCLC
																			GSM298238	Non-SCLC		GSM794307	NSCLC		GSM303093	NSCLC		GSM2196709	NSCLC
																			GSM298239	Non-SCLC		GSM794308	NSCLC		GSM303094	NSCLC		GSM2196710	NSCLC
																			GSM298240	Non-SCLC		GSM794311	NSCLC		GSM303095	NSCLC		GSM2196712	NSCLC
																			GSM298241	Non-SCLC		GSM794312	NSCLC		GSM303096	NSCLC		GSM2196713	NSCLC
																			GSM298242	Non-SCLC		GSM794313	NSCLC		GSM303097	NSCLC		GSM2196714	NSCLC
																			GSM298243	Non-SCLC		GSM794314	NSCLC		GSM303098	NSCLC		GSM2196715	NSCLC
																			GSM298244	Non-SCLC		GSM794315	NSCLC		GSM303099	NSCLC		GSM2196716	NSCLC
																			GSM298245	Non-SCLC		GSM794316	NSCLC		GSM303100	NSCLC		GSM2196718	NSCLC
																			GSM298246	Non-SCLC		GSM794318	NSCLC		GSM303101	NSCLC		GSM2196719	NSCLC
																			GSM298247	Non-SCLC		GSM794319	NSCLC		GSM303102	NSCLC		GSM2196720	NSCLC
																			GSM300859	Non-SCLC		GSM794320	NSCLC		GSM303103	NSCLC		GSM2196721	NSCLC
																			GSM302396	Non-SCLC		GSM794321	NSCLC		GSM303104	NSCLC		GSM2196722	NSCLC
																			GSM302397	Non-SCLC		GSM794323	NSCLC		GSM303105	NSCLC		GSM2196723	NSCLC
																			GSM302399	Non-SCLC		GSM794324	NSCLC		GSM303106	NSCLC		GSM2196724	NSCLC
																			GSM350871	Non-SCLC		GSM794325	NSCLC		GSM303107	NSCLC		GSM2196727	NSCLC
																			GSM350873	Non-SCLC		GSM794326	NSCLC		GSM303110	NSCLC		GSM2196728	NSCLC
																			GSM350874	Non-SCLC		GSM794328	NSCLC		GSM303111	NSCLC		GSM2196729	NSCLC
																			GSM350955	Non-SCLC		GSM794329	NSCLC		GSM303112	NSCLC		GSM2196730	NSCLC
																			GSM350956	Non-SCLC		GSM794330	NSCLC		GSM303113	NSCLC		GSM2196731	NSCLC
																			GSM350957	Non-SCLC		GSM794331	NSCLC		GSM303114	NSCLC		GSM2196733	NSCLC
																			GSM350958	Non-SCLC		GSM794333	NSCLC		GSM303115	NSCLC		GSM2196734	NSCLC
																			GSM364046	Non-SCLC		GSM794334	NSCLC		GSM303116	NSCLC		GSM2196735	NSCLC
																			GSM364048	Non-SCLC		GSM794335	NSCLC		GSM303117	NSCLC		GSM2196736	NSCLC
																			GSM410161	Non-SCLC		GSM794336	NSCLC		GSM303118	NSCLC		GSM2196737	NSCLC
																			GSM410162	Non-SCLC		GSM794337	NSCLC		GSM303119	NSCLC		GSM2196738	NSCLC
																			GSM410163	Non-SCLC		GSM794338	NSCLC		GSM303120	NSCLC		GSM2196739	NSCLC
																			GSM410164	Non-SCLC		GSM794339	NSCLC		GSM303121	NSCLC		GSM2196740	NSCLC
																			GSM410165	Non-SCLC		GSM794340	NSCLC		GSM303122	NSCLC		GSM2196741	NSCLC
																			GSM434049	Non-SCLC		GSM794341	NSCLC		GSM303123	NSCLC		GSM2196742	NSCLC
																			GSM434050	Non-SCLC		GSM794342	NSCLC		GSM303124	NSCLC		GSM2196743	NSCLC
																			GSM434051	Non-SCLC		GSM794343	NSCLC		GSM303125	NSCLC		GSM2196744	NSCLC
																			GSM434052	Non-SCLC		GSM794344	NSCLC		GSM303126	NSCLC		GSM2196745	NSCLC
																			GSM434053	Non-SCLC		GSM794346	NSCLC		GSM303127	NSCLC		GSM2196746	NSCLC
																			GSM434054	Non-SCLC		GSM794347	NSCLC		GSM303128	NSCLC		GSM2196747	NSCLC
																			GSM434055	Non-SCLC		GSM794348	NSCLC		GSM303129	NSCLC		GSM2196748	NSCLC
																			GSM434056	Non-SCLC		GSM794349	NSCLC		GSM303130	NSCLC		GSM2196749	NSCLC
																			GSM434057	Non-SCLC		GSM794350	NSCLC		GSM303131	NSCLC		GSM2196750	NSCLC
																			GSM434058	Non-SCLC		GSM794351	NSCLC		GSM303132	NSCLC		GSM2196751	NSCLC
																			GSM434059	Non-SCLC		GSM794353	NSCLC		GSM303133	NSCLC		GSM2196752	NSCLC
																			GSM434060	Non-SCLC		GSM794354	NSCLC		GSM303134	NSCLC		GSM2196753	NSCLC
																			GSM434061	Non-SCLC		GSM794356	NSCLC		GSM303135	NSCLC		GSM2196754	NSCLC
																			GSM434062	Non-SCLC		GSM794358	NSCLC		GSM303136	NSCLC		GSM2196755	NSCLC
																			GSM434063	Non-SCLC		GSM794361	NSCLC		GSM303137	NSCLC		GSM2196756	NSCLC
																			GSM458579	Non-SCLC		GSM794362	NSCLC		GSM303138	NSCLC		GSM2196757	NSCLC
																			GSM458580	Non-SCLC		GSM794363	NSCLC		GSM303139	NSCLC		GSM2196758	NSCLC
																			GSM458581	Non-SCLC		GSM794364	NSCLC		GSM303140	NSCLC		GSM2196759	NSCLC
																			GSM458582	Non-SCLC		GSM794365	NSCLC		GSM303141	NSCLC		GSM2196760	NSCLC
																			GSM469989	Non-SCLC		GSM794366	NSCLC		GSM303142	NSCLC		GSM2196761	NSCLC
																			GSM469990	Non-SCLC		GSM794367	NSCLC		GSM303143	NSCLC		GSM2196762	NSCLC
																			GSM469991	Non-SCLC		GSM794368	NSCLC		GSM303144	NSCLC		GSM2196763	NSCLC
																			GSM469992	Non-SCLC		GSM794369	NSCLC					GSM2196764	NSCLC
																			GSM469993	Non-SCLC		GSM794370	NSCLC					GSM2196765	NSCLC
																			GSM469994	Non-SCLC		GSM794371	NSCLC					GSM2196766	NSCLC
																			GSM469995	Non-SCLC		GSM794372	NSCLC					GSM2196767	NSCLC
																			GSM469996	Non-SCLC		GSM794374	NSCLC					GSM2196768	NSCLC
																			GSM469997	Non-SCLC		GSM794375	NSCLC					GSM2196769	NSCLC
																			GSM469998	Non-SCLC		GSM794376	NSCLC					GSM2196770	NSCLC
																			GSM469999	Non-SCLC		GSM794377	NSCLC					GSM2196771	NSCLC
																			GSM470000	Non-SCLC		GSM794378	NSCLC					GSM2196772	NSCLC
																			GSM470001	Non-SCLC		GSM794379	NSCLC					GSM2196773	NSCLC
																			GSM470002	Non-SCLC		GSM794380	NSCLC					GSM2196774	NSCLC
																			GSM470003	Non-SCLC		GSM794381	NSCLC					GSM2196775	NSCLC
																			GSM470004	Non-SCLC		GSM794382	NSCLC					GSM2196776	NSCLC
																			GSM470005	Non-SCLC		GSM794384	NSCLC					GSM2196778	NSCLC
																			GSM470006	Non-SCLC		GSM794385	NSCLC					GSM2196779	NSCLC
																			GSM470007	Non-SCLC		GSM794386	NSCLC					GSM2196780	NSCLC
																			GSM470008	Non-SCLC		GSM794387	NSCLC					GSM2196781	NSCLC
																			GSM470009	Non-SCLC		GSM794388	NSCLC					GSM2196782	NSCLC
																			GSM470010	Non-SCLC		GSM794389	NSCLC					GSM2196783	NSCLC
																			GSM470011	Non-SCLC		GSM794390	NSCLC					GSM2196784	NSCLC
																			GSM470012	Non-SCLC		GSM794391	NSCLC					GSM2196785	NSCLC
																			GSM470013	Non-SCLC		GSM794392	NSCLC					GSM2196786	NSCLC
																			GSM380500	Non-SCLC		GSM794393	NSCLC					GSM2196787	NSCLC
																			GSM380508	SCLC		GSM794394	NSCLC					GSM2196789	NSCLC
																			GSM380509	SCLC		GSM794395	NSCLC					GSM2196790	NSCLC
																			GSM380479	SCLC		GSM794396	NSCLC					GSM2196791	NSCLC
																			GSM380513	SCLC		GSM794397	NSCLC					GSM2196792	NSCLC
																			GSM380510	SCLC		GSM794398	NSCLC					GSM2196793	NSCLC
																			GSM380514	SCLC		GSM794399	NSCLC					GSM2196794	NSCLC
																			GSM380480	SCLC		GSM794400	NSCLC					GSM2196795	NSCLC
																			GSM380511	SCLC		GSM794401	NSCLC					GSM2196796	NSCLC
																			GSM380512	SCLC		GSM794402	NSCLC					GSM2196797	NSCLC
																			GSM380477	SCLC		GSM794403	NSCLC					GSM2196798	NSCLC
																			GSM380478	SCLC		GSM794404	NSCLC					GSM2196799	NSCLC
																			GSM380515	SCLC		GSM794405	NSCLC					GSM2196800	NSCLC
																			GSM380498	SCLC		GSM794406	NSCLC					GSM2196802	NSCLC
																			GSM380507	SCLC		GSM794407	NSCLC					GSM2196803	NSCLC
																			GSM380516	SCLC								GSM2196804	NSCLC
																			GSM380481	SCLC								GSM2196805	NSCLC
																			GSM380482	SCLC								GSM2196807	NSCLC
																			GSM380483	SCLC								GSM2196808	NSCLC
																			GSM380502	SCLC								GSM2196809	NSCLC
																			GSM380506	SCLC								GSM2196810	NSCLC
																			GSM380476	SCLC								GSM2196811	NSCLC
																			GSM380487	SCLC								GSM2196812	NSCLC
																			GSM380486	SCLC								GSM2196813	NSCLC
																			GSM380503	SCLC								GSM2196814	NSCLC
																			GSM380488	SCLC								GSM2196815	NSCLC
																			GSM380494	SCLC								GSM2196816	NSCLC
																			GSM380489	SCLC								GSM2196817	NSCLC
																			GSM380495	SCLC								GSM2196818	NSCLC
																			GSM380490	SCLC								GSM2196819	NSCLC
																			GSM380491	SCLC								GSM2196820	NSCLC
																			GSM380492	SCLC								GSM2196821	NSCLC
																			GSM380493	SCLC								GSM2196823	NSCLC
																			GSM380484	SCLC								GSM2196825	NSCLC
																			GSM380485	SCLC								GSM2196826	NSCLC
																			GSM380496	SCLC								GSM2196827	NSCLC
																			GSM380497	SCLC								GSM2196828	NSCLC
																			GSM380499	SCLC								GSM2196829	NSCLC
																			GSM380504	SCLC								GSM2196830	NSCLC
																			GSM101095	Non-SCLC								GSM2196831	NSCLC
																			GSM190152	Non-SCLC								GSM2196832	NSCLC
																			GSM256181	Non-SCLC								GSM2196833	NSCLC
																			GSM256182	Non-SCLC								GSM2196834	NSCLC
																			GSM256183	Non-SCLC								GSM2196835	NSCLC
																			GSM256184	Non-SCLC								GSM2196836	NSCLC
																			GSM256185	Non-SCLC								GSM2196837	NSCLC
																			GSM256186	Non-SCLC								GSM2196838	NSCLC
																			GSM256187	Non-SCLC								GSM2196839	NSCLC
																			GSM256188	Non-SCLC								GSM2196840	NSCLC
																			GSM256189	Non-SCLC								GSM2196841	NSCLC
																			GSM256190	Non-SCLC								GSM2196842	NSCLC
																			GSM256191	Non-SCLC								GSM2196843	NSCLC
																			GSM256192	Non-SCLC								GSM2196844	NSCLC
																			GSM256193	Non-SCLC								GSM2196845	NSCLC
																			GSM256194	Non-SCLC								GSM2196846	NSCLC
																			GSM256195	Non-SCLC								GSM2196847	NSCLC
																			GSM256196	Non-SCLC								GSM2196848	NSCLC
																			GSM256197	Non-SCLC								GSM2196849	NSCLC
																			GSM256198	Non-SCLC								GSM2196850	NSCLC
																			GSM256199	Non-SCLC								GSM2196851	NSCLC
																			GSM256201	Non-SCLC								GSM2196852	NSCLC
																			GSM256202	Non-SCLC								GSM2196854	NSCLC
																			GSM256204	Non-SCLC								GSM2196855	NSCLC
																			GSM256205	Non-SCLC								GSM2196856	NSCLC
																			GSM256206	Non-SCLC								GSM2196858	NSCLC
																			GSM256208	Non-SCLC								GSM2196859	NSCLC
																			GSM256209	Non-SCLC								GSM2196860	NSCLC
																			GSM256210	Non-SCLC								GSM2196862	NSCLC
																			GSM256211	Non-SCLC								GSM2196863	NSCLC
																			GSM256212	Non-SCLC
																			GSM463928	Non-SCLC
																			GSM748158	Non-SCLC
																			GSM748153	Non-SCLC
																			GSM748129	Non-SCLC
																			GSM748118	Non-SCLC
																			GSM748107	Non-SCLC
																			GSM748070	Non-SCLC
																			GSM748060	Non-SCLC
																			GSM748234	Non-SCLC
																			GSM748235	Non-SCLC
																			GSM748233	Non-SCLC
																			GSM748184	Non-SCLC
																			GSM748176	Non-SCLC
																			GSM748168	Non-SCLC
																			GSM748232	Non-SCLC
																			GSM748252	SCLC
																			GSM748219	SCLC
																			GSM748218	SCLC
																			GSM748215	SCLC
																			GSM748213	SCLC
																			GSM748209	SCLC
																			GSM748248	SCLC
																			GSM748250	SCLC
																			GSM748265	SCLC
																			GSM748258	SCLC
																			GSM748257	SCLC
																			GSM748256	SCLC
																			GSM748255	SCLC
																			GSM748254	SCLC
																			GSM748253	SCLC
																			GSM748251	SCLC
																			GSM748249	SCLC
																			GSM748247	SCLC
																			GSM748246	SCLC
																			GSM748245	SCLC
																			GSM748244	SCLC
																			GSM1056118	Non-SCLC
																			GSM1056119	Non-SCLC
																			GSM1056120	Non-SCLC
																			GSM1056121	Non-SCLC
																			GSM1056122	Non-SCLC
																			GSM1056123	Non-SCLC
																			GSM1056124	Non-SCLC
																			GSM1056125	Non-SCLC
																			GSM1056126	Non-SCLC
																			GSM1056127	Non-SCLC
																			GSM1056128	Non-SCLC
																			GSM1056129	Non-SCLC
																			GSM1056130	Non-SCLC
																			GSM1056131	Non-SCLC
																			GSM1056132	Non-SCLC
																			GSM1056133	Non-SCLC
																			GSM1056134	Non-SCLC
																			GSM1056135	Non-SCLC
																			GSM1056136	Non-SCLC
																			GSM1056137	Non-SCLC
																			GSM1056138	Non-SCLC
																			GSM1056139	Non-SCLC
																			GSM1056140	Non-SCLC
																			GSM1056141	Non-SCLC
																			GSM1056142	Non-SCLC
																			GSM1056143	Non-SCLC
																			GSM1056144	Non-SCLC
																			GSM1056145	Non-SCLC
																			GSM1056146	Non-SCLC
																			GSM1056147	Non-SCLC
																			GSM1056148	Non-SCLC
																			GSM1056149	Non-SCLC
																			GSM1056150	Non-SCLC
																			GSM1056151	Non-SCLC
																			GSM1056152	Non-SCLC
																			GSM1056153	Non-SCLC
																			GSM1060752	Non-SCLC
																			GSM1060768	SCLC
																			GSM1060769	SCLC
																			GSM1060770	SCLC
																			GSM1060771	SCLC
																			GSM1060772	SCLC
																			GSM1060773	SCLC
																			GSM1060774	SCLC
																			GSM1060775	SCLC
																			GSM1060776	SCLC
																			GSM1060777	SCLC
																			GSM1060778	SCLC
																			GSM1060779	SCLC
																			GSM1060780	SCLC
																			GSM1060781	SCLC
																			GSM1060782	SCLC
																			GSM1060783	SCLC
																			GSM1060784	SCLC
																			GSM1060785	SCLC
																			GSM1060786	SCLC
																			GSM1060787	SCLC
																			GSM1060788	SCLC
																			GSM1060789	SCLC
																			GSM1060790	SCLC
																			GSM1110872	SCLC
																			GSM1110865	SCLC
																			GSM1110867	SCLC
																			GSM1149498	SCLC
																			GSM1149499	SCLC
																			GSM1074716	Non-SCLC
																			GSM1074717	Non-SCLC
																			GSM1074719	Non-SCLC
																			GSM1074720	Non-SCLC
																			GSM1074722	Non-SCLC
																			GSM1074724	Non-SCLC
																			GSM1074725	Non-SCLC
																			GSM1074726	Non-SCLC
																			GSM1074727	Non-SCLC
																			GSM1074728	Non-SCLC
																			GSM1074729	Non-SCLC
																			GSM1074730	Non-SCLC
																			GSM1074731	Non-SCLC
																			GSM1074732	Non-SCLC
																			GSM1074737	Non-SCLC
																			GSM1074738	Non-SCLC
																			GSM1074741	Non-SCLC
																			GSM1074742	Non-SCLC
																			GSM1074744	Non-SCLC
																			GSM1074747	Non-SCLC
																			GSM1074748	Non-SCLC
																			GSM1074749	Non-SCLC
																			GSM1074751	Non-SCLC
																			GSM1074752	Non-SCLC
																			GSM1074755	Non-SCLC
																			GSM1074761	Non-SCLC
																			GSM1074764	Non-SCLC
																			GSM1074767	Non-SCLC
																			GSM1074768	Non-SCLC
																			GSM1074769	Non-SCLC
																			GSM1074773	Non-SCLC
																			GSM1074774	Non-SCLC
																			GSM1074775	Non-SCLC
																			GSM1074778	Non-SCLC
																			GSM1261679	Non-SCLC
																			GSM1261680	Non-SCLC
																			GSM1261681	Non-SCLC
																			GSM1618909	SCLC
																			GSM1618910	SCLC
																			GSM1618913	SCLC
																			GSM1618914	SCLC
																			GSM1618917	SCLC
																			GSM1618918	SCLC
																			GSM1618919	SCLC
																			GSM1618923	SCLC
																			GSM1618924	SCLC
																			GSM1618927	SCLC
																			GSM1618928	SCLC
																			GSM1618952	SCLC
																			GSM1618955	SCLC
																			GSM1618956	SCLC
																			GSM1618959	SCLC
																			GSM1618960	SCLC
																			GSM1618963	SCLC
																			GSM1618964	SCLC
																			GSM1618967	SCLC
																			GSM1618970	SCLC
																			GSM1618972	SCLC
																			GSM1618978	SCLC
																			GSM1618979	SCLC
																			GSM1618980	SCLC
																			GSM1618981	SCLC
																			GSM1618985	SCLC
																			GSM1618986	SCLC
																			GSM1618989	SCLC
																			GSM1618990	SCLC
																			GSM1618993	SCLC
																			GSM1618994	SCLC
																			GSM101099	Non-SCLC
																			GSM101109	Non-SCLC
																			GSM101110	Non-SCLC
																			GSM1465989	NSCLC
																			GSM1465990	NSCLC
																			GSM1465991	NSCLC
																			GSM1465992	NSCLC
																			GSM1465993	NSCLC
																			GSM1465994	NSCLC
																			GSM1465995	NSCLC
																			GSM1465996	NSCLC
																			GSM1465997	NSCLC
																			GSM1465998	NSCLC
																			GSM1465999	NSCLC
																			GSM748053	NSCLC
																			GSM748054	NSCLC
																			GSM748055	NSCLC
																			GSM748056	NSCLC
																			GSM748057	NSCLC
																			GSM748058	NSCLC
																			GSM748059	NSCLC
																			GSM748061	NSCLC
																			GSM748062	NSCLC
																			GSM748063	NSCLC
																			GSM748064	NSCLC
																			GSM748065	NSCLC
																			GSM748066	NSCLC
																			GSM748067	NSCLC
																			GSM748068	NSCLC
																			GSM748069	NSCLC
																			GSM748071	NSCLC
																			GSM748072	NSCLC
																			GSM748074	NSCLC
																			GSM748075	NSCLC
																			GSM748076	NSCLC
																			GSM748077	NSCLC
																			GSM748078	NSCLC
																			GSM748079	NSCLC
																			GSM748080	NSCLC
																			GSM748081	NSCLC
																			GSM748083	NSCLC
																			GSM748084	NSCLC
																			GSM748085	NSCLC
																			GSM748086	NSCLC
																			GSM748087	NSCLC
																			GSM748088	NSCLC
																			GSM748089	NSCLC
																			GSM748090	NSCLC
																			GSM748091	NSCLC
																			GSM748092	NSCLC
																			GSM748093	NSCLC
																			GSM748094	NSCLC
																			GSM748095	NSCLC
																			GSM748097	NSCLC
																			GSM748098	NSCLC
																			GSM748099	NSCLC
																			GSM748100	NSCLC
																			GSM748101	NSCLC
																			GSM748102	NSCLC
																			GSM748103	NSCLC
																			GSM748104	NSCLC
																			GSM748105	NSCLC
																			GSM748106	NSCLC
																			GSM748108	NSCLC
																			GSM748109	NSCLC
																			GSM748110	NSCLC
																			GSM748111	NSCLC
																			GSM748112	NSCLC
																			GSM748113	NSCLC
																			GSM748115	NSCLC
																			GSM748116	NSCLC
																			GSM748117	NSCLC
																			GSM748119	NSCLC
																			GSM748120	NSCLC
																			GSM748121	NSCLC
																			GSM748122	NSCLC
																			GSM748123	NSCLC
																			GSM748124	NSCLC
																			GSM748125	NSCLC
																			GSM748126	NSCLC
																			GSM748127	NSCLC
																			GSM748128	NSCLC
																			GSM748130	NSCLC
																			GSM748131	NSCLC
																			GSM748132	NSCLC
																			GSM748133	NSCLC
																			GSM748134	NSCLC
																			GSM748135	NSCLC
																			GSM748136	NSCLC
																			GSM748137	NSCLC
																			GSM748138	NSCLC
																			GSM748139	NSCLC
																			GSM748140	NSCLC
																			GSM748141	NSCLC
																			GSM748142	NSCLC
																			GSM748143	NSCLC
																			GSM748145	NSCLC
																			GSM748146	NSCLC
																			GSM748147	NSCLC
																			GSM748148	NSCLC
																			GSM748149	NSCLC
																			GSM748150	NSCLC
																			GSM748151	NSCLC
																			GSM748152	NSCLC
																			GSM748154	NSCLC
																			GSM748155	NSCLC
																			GSM748156	NSCLC
																			GSM748157	NSCLC
																			GSM748159	NSCLC
																			GSM748160	NSCLC
																			GSM748161	NSCLC
																			GSM748162	NSCLC
																			GSM748163	NSCLC
																			GSM748164	NSCLC
																			GSM748165	NSCLC
																			GSM748166	NSCLC
																			GSM748167	NSCLC
																			GSM748169	NSCLC
																			GSM748170	NSCLC
																			GSM748171	NSCLC
																			GSM748172	NSCLC
																			GSM748173	NSCLC
																			GSM748175	NSCLC
																			GSM748177	NSCLC
																			GSM748178	NSCLC
																			GSM748179	NSCLC
																			GSM748180	NSCLC
																			GSM748181	NSCLC
																			GSM748182	NSCLC
																			GSM748183	NSCLC
																			GSM748185	NSCLC
																			GSM748186	NSCLC
																			GSM748187	NSCLC
																			GSM748188	NSCLC
																			GSM748189	NSCLC
																			GSM748191	NSCLC
																			GSM748192	NSCLC
																			GSM748193	NSCLC
																			GSM748195	NSCLC
																			GSM748196	NSCLC
																			GSM748197	NSCLC
																			GSM748198	NSCLC
																			GSM748199	NSCLC
																			GSM748200	NSCLC
																			GSM748201	NSCLC
																			GSM748202	NSCLC
																			GSM748203	NSCLC
																			GSM748206	NSCLC
																			GSM748207	NSCLC
																			GSM748210	NSCLC
																			GSM748211	NSCLC
																			GSM748212	NSCLC
																			GSM748214	NSCLC
																			GSM748216	NSCLC
																			GSM748217	NSCLC
																			GSM748220	NSCLC
																			GSM748221	NSCLC
																			GSM748222	NSCLC
																			GSM748223	NSCLC
																			GSM748224	NSCLC
																			GSM748225	NSCLC
																			GSM748226	NSCLC
																			GSM748227	NSCLC
																			GSM748228	NSCLC
																			GSM748229	NSCLC
																			GSM748239	NSCLC
																			GSM748240	NSCLC
																			GSM748242	NSCLC
																			GSM748243	NSCLC
																			GSM748259	NSCLC
																			GSM748260	NSCLC
																			GSM748261	NSCLC
																			GSM748262	NSCLC
																			GSM748263	NSCLC
																			GSM748264	NSCLC
																			GSM748266	NSCLC
																			GSM748267	NSCLC
																			GSM748268	NSCLC
																			GSM748269	NSCLC
																			GSM748270	NSCLC
																			GSM748271	NSCLC
																			GSM748272	NSCLC
																			GSM748273	NSCLC
																			GSM748274	NSCLC
																			GSM748275	NSCLC
																			GSM748276	NSCLC
																			GSM748277	NSCLC
																			GSM748278	NSCLC
																			GSM748279	NSCLC
																			GSM748280	NSCLC
																			GSM748281	NSCLC
																			GSM748282	NSCLC
																			GSM748283	NSCLC
																			GSM748284	NSCLC
																			GSM748285	NSCLC
																			GSM748286	NSCLC
																			GSM748287	NSCLC
																			GSM748288	NSCLC
																			GSM748291	NSCLC
																			GSM748292	NSCLC
																			GSM748294	NSCLC
																			GSM748295	NSCLC
																			GSM748296	NSCLC
																			GSM748297	NSCLC
																			GSM748298	NSCLC
																			GSM748299	NSCLC
																			GSM748300	NSCLC
																			GSM748301	NSCLC
																			GSM748302	NSCLC
																			GSM748303	NSCLC
																			GSM748304	NSCLC
																			GSM748305	NSCLC
																			GSM748306	NSCLC
																			GSM748307	NSCLC
																			GSM748308	NSCLC
																			GSM748309	NSCLC
																			GSM748310	NSCLC
																			GSM748311	NSCLC
																			GSM748312	NSCLC
																			GSM748313	NSCLC
																			GSM748314	NSCLC
																			GSM748315	NSCLC
																			GSM748316	NSCLC
																			GSM748317	NSCLC
																			GSM748318	NSCLC
																			GSM748319	NSCLC
																			GSM748320	NSCLC
																			GSM748321	NSCLC
																			GSM748323	NSCLC
																			GSM748324	NSCLC
																			GSM748325	NSCLC
																			GSM748326	NSCLC
																			GSM748327	NSCLC
																			GSM748328	NSCLC
																			GSM748329	NSCLC
																			GSM748330	NSCLC
																			GSM748331	NSCLC
																			GSM748332	NSCLC
																			GSM748333	NSCLC
																			GSM748334	NSCLC
																			GSM748335	NSCLC
																			GSM748336	NSCLC
																			GSM748337	NSCLC
																			GSM748338	NSCLC
																			GSM748339	NSCLC
																			GSM748341	NSCLC
																			GSM748342	NSCLC
																			GSM748343	NSCLC
																			GSM748344	NSCLC
																			GSM748345	NSCLC
																			GSM748346	NSCLC
																			GSM748347	NSCLC
																			GSM748348	NSCLC
																			GSM748349	NSCLC
																			GSM748350	NSCLC
																			GSM748351	NSCLC
																			GSM748352	NSCLC
																			GSM748353	NSCLC
																			GSM748354	NSCLC
																			GSM748355	NSCLC
																			GSM748356	NSCLC
																			GSM748357	NSCLC
																			GSM748358	NSCLC
																			GSM748359	NSCLC
																			GSM748360	NSCLC
																			GSM748361	NSCLC
																			GSM748362	NSCLC
																			GSM748363	NSCLC
																			GSM748364	NSCLC
																			GSM748365	NSCLC
																			GSM748366	NSCLC

## Sheet: In-house SCLC Samples
Patient ID	CDKN2C protein levels of SCLC tissues	CDKN2C protein levels of non-SCLC tissues	Gender	Age
Patient 1	4	2	Male	71
Patient 2	4	4	Male	54
Patient 3	8	4	Male	51
Patient 4	12	4	Male	55
Patient 5	8	4	Male	57
Patient 6	8	2	Male	59
Patient 7	12	4	Male	58
Patient 8	12	4	Male	72
Patient 9	12	4	NA	NA
Patient 10	8	4	NA	NA
Patient 11	8	4	Male	65
Patient 12	4	2	Male	52
Patient 13	8	2	Male	56
Patient 14	8	0	Male	47
Patient 15	8	4	Male	66
Patient 16	12	4	Female	65
Patient 17	4	2	Male	48
Patient 18	8	4	Male	77
Patient 19	12	2	Male	55
Patient 20	12	2	Male	77
Patient 21	8	4	Male	65
Patient 22	8	2	Male	55
Patient 23	12	4	Male	67
Patient 24	4	2	NA	NA
Patient 25	4	2	Male	71
Patient 26	8	2	Male	68
Patient 27	NA	2	NA	NA
Patient 28	NA	4	NA	NA
Patient 29	NA	4	NA	NA

## Sheet: Samples for Pan-cancer analysis
Patient ID	Cancer	Group	CDKN2C expression	AJCC stage	Age	Gender
TCGA-OR-A5K3-01	ACC	Tumor	3.77613	II	<65	Male
TCGA-OR-A5J2-01	ACC	Tumor	5.2234	IV	<65	Female
TCGA-OR-A5LN-01	ACC	Tumor	4.28243	II	<65	Female
TCGA-OR-A5KY-01	ACC	Tumor	4.38679	IV	<65	Female
TCGA-OR-A5LG-01	ACC	Tumor	5.09975	III	<65	Male
TCGA-OR-A5JC-01	ACC	Tumor	5.02196	NA	<65	Male
TCGA-OR-A5JV-01	ACC	Tumor	5.15503	II	<65	Male
TCGA-OU-A5PI-01	ACC	Tumor	5.14201	IV	<65	Female
TCGA-OR-A5KO-01	ACC	Tumor	6.71063	IV	<65	Female
TCGA-OR-A5JP-01	ACC	Tumor	5.33486	II	<65	Male
TCGA-OR-A5L9-01	ACC	Tumor	2.14078	II	<65	Female
TCGA-OR-A5JO-01	ACC	Tumor	4.60699	I	<65	Female
TCGA-OR-A5JX-01	ACC	Tumor	4.55151	III	<65	Male
TCGA-PA-A5YG-01	ACC	Tumor	3.7463	II	<65	Male
TCGA-OR-A5LD-01	ACC	Tumor	4.64153	III	<65	Male
TCGA-OR-A5LL-01	ACC	Tumor	3.04441	II	≥65	Female
TCGA-OR-A5K8-01	ACC	Tumor	1.83187	II	<65	Male
TCGA-OR-A5KW-01	ACC	Tumor	4.27276	III	<65	Female
TCGA-OR-A5J9-01	ACC	Tumor	5.55646	II	<65	Female
TCGA-OR-A5L8-01	ACC	Tumor	6.36015	II	<65	Female
TCGA-OR-A5J6-01	ACC	Tumor	4.17791	II	<65	Female
TCGA-OR-A5JJ-01	ACC	Tumor	6.08381	IV	≥65	Male
TCGA-OR-A5LJ-01	ACC	Tumor	3.2234	IV	<65	Female
TCGA-OR-A5JM-01	ACC	Tumor	5.16144	IV	<65	Female
TCGA-PK-A5HB-01	ACC	Tumor	5.9623	NA	<65	Male
TCGA-OR-A5JF-01	ACC	Tumor	3.18266	II	≥65	Female
TCGA-OR-A5K9-01	ACC	Tumor	5.35437	II	<65	Female
TCGA-OR-A5LM-01	ACC	Tumor	4.61879	II	<65	Male
TCGA-OR-A5KZ-01	ACC	Tumor	6.88048	II	<65	Male
TCGA-PK-A5H8-01	ACC	Tumor	4.36319	II	<65	Male
TCGA-OR-A5J7-01	ACC	Tumor	5.4141	III	<65	Female
TCGA-P6-A5OG-01	ACC	Tumor	3.25998	IV	<65	Female
TCGA-OR-A5K1-01	ACC	Tumor	5.72108	II	<65	Male
TCGA-OR-A5LT-01	ACC	Tumor	4.05483	III	<65	Male
TCGA-OR-A5L6-01	ACC	Tumor	4.24034	II	<65	Male
TCGA-OR-A5JW-01	ACC	Tumor	3.91169	II	<65	Male
TCGA-OR-A5LE-01	ACC	Tumor	6.37853	II	<65	Male
TCGA-OR-A5JA-01	ACC	Tumor	4.61236	IV	<65	Female
TCGA-OR-A5J5-01	ACC	Tumor	2.70265	III	<65	Male
TCGA-OR-A5JZ-01	ACC	Tumor	5.4226	II	<65	Male
TCGA-OR-A5JI-01	ACC	Tumor	3.81149	I	<65	Male
TCGA-OR-A5LA-01	ACC	Tumor	3.2824	II	<65	Female
TCGA-PK-A5HA-01	ACC	Tumor	4.48733	I	<65	Male
TCGA-OR-A5JQ-01	ACC	Tumor	4.98824	II	<65	Female
TCGA-OR-A5JE-01	ACC	Tumor	5.26683	I	<65	Female
TCGA-OR-A5KU-01	ACC	Tumor	5.81562	II	<65	Female
TCGA-OR-A5LB-01	ACC	Tumor	3.94954	IV	<65	Male
TCGA-OR-A5K5-01	ACC	Tumor	4.68822	III	<65	Female
TCGA-OR-A5J8-01	ACC	Tumor	5.45709	III	≥65	Male
TCGA-OR-A5L5-01	ACC	Tumor	4.67073	I	≥65	Female
TCGA-OR-A5J3-01	ACC	Tumor	2.38406	III	<65	Female
TCGA-OR-A5LS-01	ACC	Tumor	4.14241	II	<65	Female
TCGA-OR-A5LH-01	ACC	Tumor	3.78865	II	<65	Female
TCGA-OR-A5JL-01	ACC	Tumor	4.15789	I	<65	Female
TCGA-OR-A5JG-01	ACC	Tumor	3.49441	IV	<65	Male
TCGA-OR-A5LO-01	ACC	Tumor	4.93926	II	<65	Female
TCGA-OR-A5L3-01	ACC	Tumor	2.18585	I	≥65	Female
TCGA-OR-A5LC-01	ACC	Tumor	4.26982	IV	≥65	Female
TCGA-P6-A5OF-01	ACC	Tumor	2.65538	III	<65	Female
TCGA-OR-A5KX-01	ACC	Tumor	6.1045	III	<65	Female
TCGA-OR-A5K4-01	ACC	Tumor	6.33704	III	<65	Female
TCGA-OR-A5J1-01	ACC	Tumor	5.50235	II	<65	Male
TCGA-OR-A5JT-01	ACC	Tumor	6.18367	II	≥65	Female
TCGA-OR-A5JB-01	ACC	Tumor	5.83595	IV	<65	Male
TCGA-OR-A5JY-01	ACC	Tumor	5.42084	IV	≥65	Female
TCGA-OR-A5JR-01	ACC	Tumor	5.61472	I	<65	Male
TCGA-OR-A5KV-01	ACC	Tumor	2.55584	III	<65	Female
TCGA-OR-A5K6-01	ACC	Tumor	4.7137	II	<65	Female
TCGA-OR-A5JS-01	ACC	Tumor	4.98456	II	≥65	Female
TCGA-OR-A5LP-01	ACC	Tumor	3.57776	II	<65	Female
TCGA-OR-A5LK-01	ACC	Tumor	0.956073	II	<65	Male
TCGA-OR-A5JK-01	ACC	Tumor	3.90404	IV	<65	Male
TCGA-OR-A5JD-01	ACC	Tumor	2.58253	II	<65	Female
TCGA-OR-A5L4-01	ACC	Tumor	4.46794	III	<65	Female
TCGA-OR-A5KT-01	ACC	Tumor	5.14531	I	<65	Female
TCGA-PK-A5H9-01	ACC	Tumor	3.99364	II	<65	Female
TCGA-OR-A5K0-01	ACC	Tumor	5.43227	II	≥65	Female
TCGA-MV-A51V-01	BLCA	Tumor	4.93732	III	≥65	Male
TCGA-FD-A3SR-01	BLCA	Tumor	7.24871	IV	≥65	Male
TCGA-DK-A6B0-01	BLCA	Tumor	2.53354	II	<65	Male
TCGA-FD-A5BS-01	BLCA	Tumor	3.31618	III	≥65	Male
TCGA-DK-A1AD-01	BLCA	Tumor	2.38681	IV	≥65	Male
TCGA-XF-AAMQ-01	BLCA	Tumor	3.88557	II	<65	Female
TCGA-FT-A3EE-01	BLCA	Tumor	1.37293	III	≥65	Female
TCGA-ZF-AA4T-01	BLCA	Tumor	3.03211	IV	≥65	Male
TCGA-E7-A3X6-01	BLCA	Tumor	3.68486	II	≥65	Male
TCGA-GU-A762-01	BLCA	Tumor	4.27949	IV	≥65	Male
TCGA-FD-A43S-01	BLCA	Tumor	2.82984	III	≥65	Female
TCGA-XF-A8HE-01	BLCA	Tumor	3.79181	III	<65	Male
TCGA-BT-A42F-01	BLCA	Tumor	1.93357	IV	<65	Male
TCGA-G2-A3IB-01	BLCA	Tumor	2.42764	II	≥65	Male
TCGA-CU-A3KJ-01	BLCA	Tumor	3.52735	III	≥65	Male
TCGA-DK-A3IS-01	BLCA	Tumor	4.2979	II	≥65	Male
TCGA-E5-A4U1-01	BLCA	Tumor	2.89532	II	≥65	Male
TCGA-XF-A8HF-01	BLCA	Tumor	3.3205	III	≥65	Male
TCGA-KQ-A41P-01	BLCA	Tumor	3.26903	IV	≥65	Male
TCGA-BL-A13I-01	BLCA	Tumor	3.20269	III	<65	Female
TCGA-ZF-AA4W-01	BLCA	Tumor	3.73881	III	<65	Male
TCGA-UY-A9PA-01	BLCA	Tumor	2.50077	III	<65	Male
TCGA-E5-A2PC-01	BLCA	Tumor	5.28797	IV	<65	Female
TCGA-UY-A9PE-01	BLCA	Tumor	2.73335	IV	≥65	Male
TCGA-XF-A9SV-01	BLCA	Tumor	5.02767	IV	≥65	Male
TCGA-E7-A6MF-01	BLCA	Tumor	1.541	II	<65	Male
TCGA-ZF-AA56-01	BLCA	Tumor	4.32696	III	≥65	Female
TCGA-DK-AA6X-01	BLCA	Tumor	4.61351	II	<65	Male
TCGA-ZF-A9R9-01	BLCA	Tumor	2.63228	IV	<65	Male
TCGA-DK-AA6S-01	BLCA	Tumor	2.15054	III	<65	Male
TCGA-KQ-A41S-01	BLCA	Tumor	5.84519	III	≥65	Female
TCGA-YF-AA3M-01	BLCA	Tumor	5.20005	II	<65	Male
TCGA-CF-A7I0-01	BLCA	Tumor	2.87188	II	<65	Male
TCGA-XF-A9T8-01	BLCA	Tumor	4.52672	III	<65	Male
TCGA-CU-A0YR-01	BLCA	Tumor	1.92221	IV	≥65	Male
TCGA-GC-A3YS-01	BLCA	Tumor	4.06696	IV	<65	Male
TCGA-ZF-AA4N-01	BLCA	Tumor	3.35051	II	≥65	Male
TCGA-XF-AAMG-01	BLCA	Tumor	4.26081	III	<65	Male
TCGA-GC-A3RC-01	BLCA	Tumor	5.23878	II	<65	Male
TCGA-CF-A8HY-01	BLCA	Tumor	2.61117	II	<65	Male
TCGA-ZF-A9RL-01	BLCA	Tumor	3.32482	II	<65	Male
TCGA-XF-A9T0-01	BLCA	Tumor	2.58012	III	≥65	Male
TCGA-UY-A78M-01	BLCA	Tumor	2.83595	IV	≥65	Female
TCGA-GC-A4ZW-01	BLCA	Tumor	4.51668	III	≥65	Male
TCGA-K4-A4AC-01	BLCA	Tumor	2.74628	II	≥65	Male
TCGA-G2-A2ES-01	BLCA	Tumor	2.35615	II	≥65	Male
TCGA-FJ-A871-01	BLCA	Tumor	5.36734	III	<65	Male
TCGA-GD-A3OP-01	BLCA	Tumor	5.2604	IV	≥65	Female
TCGA-FD-A3SL-01	BLCA	Tumor	6.65002	IV	<65	Male
TCGA-XF-A9T3-01	BLCA	Tumor	4.05747	IV	≥65	Female
TCGA-ZF-AA4V-01	BLCA	Tumor	3.09428	III	≥65	Male
TCGA-XF-AAMW-01	BLCA	Tumor	2.6182	IV	≥65	Female
TCGA-G2-A2EO-01	BLCA	Tumor	3.06694	III	≥65	Male
TCGA-XF-A8HH-01	BLCA	Tumor	3.466	IV	<65	Female
TCGA-FD-A3B7-01	BLCA	Tumor	3.29128	III	≥65	Male
TCGA-K4-A3WU-01	BLCA	Tumor	3.46464	III	≥65	Male
TCGA-CF-A47V-01	BLCA	Tumor	3.44228	II	<65	Male
TCGA-DK-A3X1-01	BLCA	Tumor	1.0072	III	≥65	Female
TCGA-4Z-AA81-01	BLCA	Tumor	3.35475	II	≥65	Male
TCGA-CF-A3MG-01	BLCA	Tumor	3.51219	II	<65	Male
TCGA-S5-AA26-01	BLCA	Tumor	4.04262	III	<65	Male
TCGA-ZF-A9R4-01	BLCA	Tumor	4.13835	II	≥65	Male
TCGA-GC-A3OO-01	BLCA	Tumor	5.96161	II	≥65	Male
TCGA-YC-A9TC-01	BLCA	Tumor	4.14156	IV	≥65	Male
TCGA-YF-AA3L-01	BLCA	Tumor	4.2234	II	<65	Female
TCGA-XF-A9SJ-01	BLCA	Tumor	3.17154	IV	≥65	Male
TCGA-ZF-A9R0-01	BLCA	Tumor	2.61117	III	≥65	Male
TCGA-BT-A42C-01	BLCA	Tumor	3.80322	II	<65	Male
TCGA-GU-A42P-01	BLCA	Tumor	5.05182	IV	≥65	Male
TCGA-2F-A9KP-01	BLCA	Tumor	2.75275	IV	≥65	Male
TCGA-CU-A3QU-01	BLCA	Tumor	3.94673	IV	<65	Male
TCGA-DK-AA6Q-01	BLCA	Tumor	3.82477	IV	<65	Female
TCGA-BT-A20P-01	BLCA	Tumor	2.33053	III	≥65	Female
TCGA-ZF-A9RN-01	BLCA	Tumor	5.0144	III	≥65	Female
TCGA-GV-A3QI-01	BLCA	Tumor	6.59499	III	<65	Male
TCGA-FD-A5BU-01	BLCA	Tumor	3.26608	II	≥65	Female
TCGA-FD-A3NA-01	BLCA	Tumor	2.81353	II	<65	Male
TCGA-DK-AA76-01	BLCA	Tumor	2.77817	II	<65	Female
TCGA-DK-A1AA-01	BLCA	Tumor	3.04265	III	<65	Male
TCGA-FD-A3B3-01	BLCA	Tumor	4.21336	III	≥65	Female
TCGA-FD-A6TF-01	BLCA	Tumor	3.60766	IV	≥65	Female
TCGA-BT-A20W-01	BLCA	Tumor	3.11602	II	≥65	Male
TCGA-GU-A767-01	BLCA	Tumor	3.19851	IV	≥65	Male
TCGA-DK-A6B2-01	BLCA	Tumor	3.13914	IV	≥65	Male
TCGA-XF-A9T5-01	BLCA	Tumor	4.04177	IV	≥65	Female
TCGA-GC-A3RB-01	BLCA	Tumor	4.15619	III	<65	Male
TCGA-XF-AAME-01	BLCA	Tumor	4.67073	II	<65	Female
TCGA-FD-A6TE-01	BLCA	Tumor	6.60083	IV	<65	Male
TCGA-BT-A20O-01	BLCA	Tumor	4.03914	III	≥65	Male
TCGA-E7-A6ME-01	BLCA	Tumor	6.6126	II	≥65	Male
TCGA-XF-AAMJ-01	BLCA	Tumor	2.848	III	≥65	Male
TCGA-CF-A1HR-01	BLCA	Tumor	2.76553	III	<65	Male
TCGA-CF-A9FL-01	BLCA	Tumor	3.45418	III	≥65	Male
TCGA-H4-A2HO-01	BLCA	Tumor	2.01078	III	<65	Male
TCGA-FJ-A3Z7-01	BLCA	Tumor	1.87187	IV	≥65	Male
TCGA-DK-AA6L-01	BLCA	Tumor	5.86396	IV	<65	Male
TCGA-BT-A3PJ-01	BLCA	Tumor	3.90786	III	≥65	Male
TCGA-K4-A5RH-01	BLCA	Tumor	5.71147	III	≥65	Male
TCGA-BT-A0YX-01	BLCA	Tumor	2.6182	III	≥65	Female
TCGA-XF-A9SK-01	BLCA	Tumor	4.59395	IV	≥65	Male
TCGA-UY-A9PH-01	BLCA	Tumor	2.848	II	≥65	Male
TCGA-ZF-A9RC-01	BLCA	Tumor	1.96351	III	≥65	Male
TCGA-DK-AA74-01	BLCA	Tumor	3.8934	III	≥65	Male
TCGA-XF-A9SX-01	BLCA	Tumor	4.31395	IV	<65	Female
TCGA-XF-AAN1-01	BLCA	Tumor	3.88752	III	≥65	Female
TCGA-FD-A43X-01	BLCA	Tumor	2.82778	II	≥65	Male
TCGA-K4-A3WS-01	BLCA	Tumor	2.97451	III	≥65	Male
TCGA-G2-AA3D-01	BLCA	Tumor	3.76557	IV	<65	Male
TCGA-GU-AATQ-01	BLCA	Tumor	5.14648	III	≥65	Male
TCGA-GD-A3OQ-01	BLCA	Tumor	3.00721	IV	<65	Male
TCGA-DK-A3WW-01	BLCA	Tumor	2.69596	III	<65	Male
TCGA-PQ-A6FI-01	BLCA	Tumor	4.86	II	≥65	Male
TCGA-BL-A5ZZ-01	BLCA	Tumor	3.52607	III	≥65	Female
TCGA-E7-A5KE-01	BLCA	Tumor	3.35475	II	≥65	Female
TCGA-FD-A3SQ-01	BLCA	Tumor	4.30739	IV	<65	Male
TCGA-DK-A1AG-01	BLCA	Tumor	2.24487	III	≥65	Male
TCGA-DK-A3IT-01	BLCA	Tumor	4.07891	III	<65	Male
TCGA-XF-AAMR-01	BLCA	Tumor	3.97359	III	<65	Male
TCGA-HQ-A5NE-01	BLCA	Tumor	3.75704	III	<65	Male
TCGA-ZF-AA52-01	BLCA	Tumor	4.59337	III	≥65	Male
TCGA-E7-A541-01	BLCA	Tumor	5.62206	II	≥65	Male
TCGA-UY-A8OB-01	BLCA	Tumor	3.93448	IV	<65	Male
TCGA-XF-AAN5-01	BLCA	Tumor	1.95237	III	<65	Female
TCGA-E7-A97P-01	BLCA	Tumor	3.18106	II	≥65	Male
TCGA-GC-A3RD-01	BLCA	Tumor	2.71145	III	≥65	Female
TCGA-E7-A7XN-01	BLCA	Tumor	2.92792	III	≥65	Male
TCGA-GV-A3JX-01	BLCA	Tumor	6.28668	III	<65	Male
TCGA-4Z-AA83-01	BLCA	Tumor	1.93734	II	<65	Male
TCGA-ZF-AA5N-01	BLCA	Tumor	1.07726	IV	<65	Female
TCGA-H4-A2HQ-01	BLCA	Tumor	3.95047	IV	<65	Female
TCGA-G2-A2EF-01	BLCA	Tumor	3.03738	II	<65	Male
TCGA-UY-A9PF-01	BLCA	Tumor	3.62879	IV	≥65	Male
TCGA-XF-A9SU-01	BLCA	Tumor	2.75488	IV	≥65	Female
TCGA-DK-A3WY-01	BLCA	Tumor	4.63164	III	≥65	Female
TCGA-5N-A9KM-01	BLCA	Tumor	3.39234	III	≥65	Female
TCGA-DK-AA6T-01	BLCA	Tumor	5.39985	II	<65	Male
TCGA-E5-A4TZ-01	BLCA	Tumor	3.92028	IV	<65	Male
TCGA-FD-A43N-01	BLCA	Tumor	2.2079	III	≥65	Male
TCGA-5N-A9KI-01	BLCA	Tumor	5.00044	III	≥65	Female
TCGA-FD-A3SP-01	BLCA	Tumor	3.49314	III	<65	Male
TCGA-XF-AAMH-01	BLCA	Tumor	0.985488	IV	≥65	Male
TCGA-DK-A2I2-01	BLCA	Tumor	2.03212	IV	<65	Female
TCGA-KQ-A41O-01	BLCA	Tumor	3.15546	IV	≥65	Male
TCGA-DK-A3IM-01	BLCA	Tumor	0.848008	III	≥65	Male
TCGA-4Z-AA7Q-01	BLCA	Tumor	3.22037	III	≥65	Male
TCGA-DK-A2I6-01	BLCA	Tumor	3.36034	IV	≥65	Male
TCGA-DK-A6B6-01	BLCA	Tumor	2.41682	II	<65	Male
TCGA-CU-A72E-01	BLCA	Tumor	3.42495	IV	≥65	Male
TCGA-FT-A61P-01	BLCA	Tumor	3.6915	IV	≥65	Male
TCGA-DK-A3IQ-01	BLCA	Tumor	3.62529	III	≥65	Male
TCGA-UY-A78N-01	BLCA	Tumor	4.61821	IV	≥65	Male
TCGA-4Z-AA7Y-01	BLCA	Tumor	3.57656	II	<65	Male
TCGA-G2-A2EK-01	BLCA	Tumor	3.05488	II	<65	Male
TCGA-FD-A3SO-01	BLCA	Tumor	2.13097	IV	≥65	Male
TCGA-GC-A3WC-01	BLCA	Tumor	3.73548	III	≥65	Female
TCGA-4Z-AA7M-01	BLCA	Tumor	4.70379	III	≥65	Male
TCGA-BL-A3JM-01	BLCA	Tumor	3.48803	III	<65	Male
TCGA-ZF-AA4U-01	BLCA	Tumor	4.38546	III	≥65	Male
TCGA-ZF-AA53-01	BLCA	Tumor	4.43626	II	<65	Male
TCGA-CF-A9FF-01	BLCA	Tumor	2.51099	II	<65	Male
TCGA-DK-A3IV-01	BLCA	Tumor	6.51475	II	<65	Male
TCGA-FJ-A3Z9-01	BLCA	Tumor	0.99279	NA	≥65	Male
TCGA-XF-AAMT-01	BLCA	Tumor	3.15706	IV	≥65	Female
TCGA-XF-AAN4-01	BLCA	Tumor	4.14401	III	≥65	Female
TCGA-XF-A8HB-01	BLCA	Tumor	5.62383	II	<65	Female
TCGA-BT-A0S7-01	BLCA	Tumor	3.3813	III	≥65	Male
TCGA-FD-A5C1-01	BLCA	Tumor	3.49569	III	<65	Female
TCGA-FD-A3B4-01	BLCA	Tumor	3.22037	III	<65	Female
TCGA-FD-A3N5-01	BLCA	Tumor	4.33057	II	≥65	Male
TCGA-4Z-AA86-01	BLCA	Tumor	4.27427	IV	≥65	Male
TCGA-4Z-AA7O-01	BLCA	Tumor	4.66275	II	<65	Male
TCGA-BT-A2LB-01	BLCA	Tumor	2.848	III	≥65	Female
TCGA-GV-A3QF-01	BLCA	Tumor	2.44362	IV	≥65	Male
TCGA-E7-A7DV-01	BLCA	Tumor	4.42891	IV	<65	Male
TCGA-XF-A9SI-01	BLCA	Tumor	4.39918	II	≥65	Female
TCGA-C4-A0F7-01	BLCA	Tumor	3.5729	IV	≥65	Male
TCGA-DK-A6AW-01	BLCA	Tumor	2.75488	II	≥65	Male
TCGA-DK-AA75-01	BLCA	Tumor	2.21724	III	≥65	Male
TCGA-FD-A62O-01	BLCA	Tumor	1.69596	IV	≥65	Male
TCGA-LT-A5Z6-01	BLCA	Tumor	5.2307	II	<65	Male
TCGA-FD-A3B8-01	BLCA	Tumor	3.99458	II	<65	Male
TCGA-FJ-A3ZE-01	BLCA	Tumor	3.43829	IV	≥65	Male
TCGA-ZF-A9RM-01	BLCA	Tumor	6.019	II	≥65	Male
TCGA-UY-A78L-01	BLCA	Tumor	3.75806	IV	<65	Male
TCGA-DK-A2I1-01	BLCA	Tumor	3.29569	II	≥65	Female
TCGA-FD-A62S-01	BLCA	Tumor	3.59096	III	<65	Female
TCGA-XF-AAMZ-01	BLCA	Tumor	3.38401	IV	≥65	Female
TCGA-FD-A3SM-01	BLCA	Tumor	3.97546	IV	≥65	Male
TCGA-E7-A85H-01	BLCA	Tumor	2.9616	III	<65	Male
TCGA-E7-A678-01	BLCA	Tumor	2.60406	III	<65	Male
TCGA-BT-A20X-01	BLCA	Tumor	3.706	IV	<65	Male
TCGA-CF-A9FH-01	BLCA	Tumor	2.47767	II	≥65	Male
TCGA-FD-A3N6-01	BLCA	Tumor	3.96348	II	<65	Female
TCGA-CF-A47T-01	BLCA	Tumor	1.95608	II	<65	Female
TCGA-4Z-AA7W-01	BLCA	Tumor	4.17309	II	<65	Male
TCGA-C4-A0F6-01	BLCA	Tumor	2.4195	III	≥65	Female
TCGA-4Z-AA7S-01	BLCA	Tumor	3.96161	III	≥65	Male
TCGA-UY-A78K-01	BLCA	Tumor	4.935	IV	<65	Male
TCGA-4Z-AA87-01	BLCA	Tumor	2.24795	III	≥65	Male
TCGA-DK-A3IN-01	BLCA	Tumor	2.68928	III	≥65	Male
TCGA-CU-A0YO-01	BLCA	Tumor	2.74849	IV	≥65	Male
TCGA-ZF-A9R5-01	BLCA	Tumor	1.3505	III	<65	Male
TCGA-ZF-A9R1-01	BLCA	Tumor	4.41614	IV	≥65	Male
TCGA-CF-A47S-01	BLCA	Tumor	1.14405	II	<65	Male
TCGA-FD-A62N-01	BLCA	Tumor	3.75806	III	≥65	Male
TCGA-YC-A89H-01	BLCA	Tumor	2.08748	II	≥65	Female
TCGA-GU-A42R-01	BLCA	Tumor	3.70821	IV	≥65	Male
TCGA-CF-A47X-01	BLCA	Tumor	1.89915	II	<65	Male
TCGA-2F-A9KQ-01	BLCA	Tumor	4.33485	III	≥65	Male
TCGA-DK-A1A7-01	BLCA	Tumor	1.32191	IV	≥65	Female
TCGA-LT-A8JT-01	BLCA	Tumor	2.75701	II	≥65	Female
TCGA-GV-A6ZA-01	BLCA	Tumor	3.36738	II	<65	Male
TCGA-FD-A5BT-01	BLCA	Tumor	3.34627	III	≥65	Male
TCGA-GV-A3QH-01	BLCA	Tumor	3.69492	II	≥65	Male
TCGA-SY-A9G0-01	BLCA	Tumor	3.46209	IV	≥65	Male
TCGA-BT-A2LD-01	BLCA	Tumor	3.89918	IV	≥65	Female
TCGA-DK-A1AC-01	BLCA	Tumor	2.59454	III	≥65	Male
TCGA-FD-A6TD-01	BLCA	Tumor	4.76183	III	≥65	Male
TCGA-DK-AA77-01	BLCA	Tumor	3.04265	II	<65	Male
TCGA-XF-A8HC-01	BLCA	Tumor	5.48798	IV	≥65	Male
TCGA-PQ-A6FN-01	BLCA	Tumor	3.79283	III	≥65	Female
TCGA-XF-A9SL-01	BLCA	Tumor	4.25474	IV	≥65	Male
TCGA-GC-A6I1-01	BLCA	Tumor	4.57708	II	≥65	Female
TCGA-FD-A5BX-01	BLCA	Tumor	4.58858	IV	≥65	Male
TCGA-BT-A20V-01	BLCA	Tumor	4.35824	IV	<65	Female
TCGA-FD-A6TA-01	BLCA	Tumor	3.03914	IV	<65	Male
TCGA-GV-A3JW-01	BLCA	Tumor	2.49567	II	≥65	Male
TCGA-CF-A1HS-01	BLCA	Tumor	3.1293	III	≥65	Female
TCGA-CU-A5W6-01	BLCA	Tumor	3.34627	III	≥65	Male
TCGA-FD-A6TC-01	BLCA	Tumor	5.29089	III	≥65	Female
TCGA-GC-A3I6-01	BLCA	Tumor	5.23538	III	<65	Male
TCGA-FD-A6TH-01	BLCA	Tumor	4.07035	IV	<65	Male
TCGA-K4-A83P-01	BLCA	Tumor	3.09595	IV	≥65	Male
TCGA-BT-A20N-01	BLCA	Tumor	2.66675	III	≥65	Male
TCGA-UY-A9PB-01	BLCA	Tumor	3.36738	III	<65	Male
TCGA-E7-A4IJ-01	BLCA	Tumor	3.29865	II	<65	Male
TCGA-DK-A3IL-01	BLCA	Tumor	4.28537	IV	≥65	Female
TCGA-ZF-AA51-01	BLCA	Tumor	1.85996	II	≥65	Female
TCGA-E7-A7PW-01	BLCA	Tumor	3.2479	III	<65	Male
TCGA-FD-A62P-01	BLCA	Tumor	2.66675	II	≥65	Male
TCGA-GV-A40G-01	BLCA	Tumor	5.41078	II	≥65	Male
TCGA-GD-A2C5-01	BLCA	Tumor	4.1627	IV	<65	Female
TCGA-GU-AATO-01	BLCA	Tumor	5.26936	IV	≥65	Male
TCGA-BT-A3PK-01	BLCA	Tumor	3.15546	II	≥65	Male
TCGA-K4-A54R-01	BLCA	Tumor	2.44893	II	<65	Male
TCGA-DK-A1A6-01	BLCA	Tumor	3.18426	IV	<65	Male
TCGA-K4-A5RI-01	BLCA	Tumor	5.38198	III	≥65	Female
TCGA-E7-A519-01	BLCA	Tumor	1.45944	II	≥65	Male
TCGA-2F-A9KO-01	BLCA	Tumor	3.99092	IV	<65	Male
TCGA-XF-A9SZ-01	BLCA	Tumor	4.14647	IV	≥65	Male
TCGA-DK-A2HX-01	BLCA	Tumor	4.74902	IV	≥65	Female
TCGA-DK-AA6P-01	BLCA	Tumor	2.13097	II	≥65	Female
TCGA-XF-A9SM-01	BLCA	Tumor	3.39777	III	≥65	Male
TCGA-S5-A6DX-01	BLCA	Tumor	2.76127	IV	≥65	Male
TCGA-G2-AA3B-01	BLCA	Tumor	3.19531	II	≥65	Female
TCGA-GU-AATP-01	BLCA	Tumor	2.91455	IV	≥65	Male
TCGA-FD-A43Y-01	BLCA	Tumor	3.48931	III	≥65	Male
TCGA-ZF-A9RE-01	BLCA	Tumor	4.34692	II	≥65	Female
TCGA-2F-A9KW-01	BLCA	Tumor	2.45416	III	≥65	Female
TCGA-DK-A1AB-01	BLCA	Tumor	3.10603	IV	≥65	Female
TCGA-CU-A0YN-01	BLCA	Tumor	2.74628	III	<65	Male
TCGA-GC-A3BM-01	BLCA	Tumor	5.68401	II	≥65	Male
TCGA-FD-A5BV-01	BLCA	Tumor	3.29425	III	<65	Female
TCGA-FD-A3SS-01	BLCA	Tumor	5.40766	IV	≥65	Male
TCGA-K4-A6FZ-01	BLCA	Tumor	2.94671	III	≥65	Female
TCGA-GD-A76B-01	BLCA	Tumor	2.75275	II	≥65	Female
TCGA-DK-AA71-01	BLCA	Tumor	2.10771	II	≥65	Male
TCGA-4Z-AA7R-01	BLCA	Tumor	3.12602	IV	≥65	Male
TCGA-ZF-AA58-01	BLCA	Tumor	4.85353	IV	<65	Female
TCGA-K4-A6MB-01	BLCA	Tumor	3.797	IV	<65	Male
TCGA-DK-A6B5-01	BLCA	Tumor	4.72082	IV	<65	Male
TCGA-HQ-A5ND-01	BLCA	Tumor	4.98417	IV	≥65	Male
TCGA-E7-A8O8-01	BLCA	Tumor	2.04961	II	<65	Male
TCGA-UY-A8OD-01	BLCA	Tumor	2.6713	II	≥65	Female
TCGA-E7-A8O7-01	BLCA	Tumor	1.76551	II	<65	Male
TCGA-XF-AAMX-01	BLCA	Tumor	3.76872	III	≥65	Female
TCGA-XF-AAN0-01	BLCA	Tumor	5.10014	IV	≥65	Male
TCGA-4Z-AA82-01	BLCA	Tumor	3.77187	IV	<65	Male
TCGA-ZF-A9R7-01	BLCA	Tumor	2.75701	II	≥65	Female
TCGA-E7-A4XJ-01	BLCA	Tumor	0.941119	II	≥65	Male
TCGA-XF-A8HG-01	BLCA	Tumor	0.555816	III	≥65	Male
TCGA-XF-A8HD-01	BLCA	Tumor	4.40527	III	≥65	Male
TCGA-FJ-A3ZF-01	BLCA	Tumor	4.17876	III	≥65	Male
TCGA-UY-A9PD-01	BLCA	Tumor	2.35333	III	≥65	Male
TCGA-G2-A2EL-01	BLCA	Tumor	6.67775	II	≥65	Male
TCGA-XF-A9SP-01	BLCA	Tumor	3.55578	III	<65	Male
TCGA-DK-AA6U-01	BLCA	Tumor	3.07557	II	<65	Male
TCGA-ZF-AA5H-01	BLCA	Tumor	3.67924	IV	<65	Female
TCGA-ZF-AA54-01	BLCA	Tumor	5.52358	III	≥65	Male
TCGA-XF-A9ST-01	BLCA	Tumor	2.48539	III	≥65	Male
TCGA-KQ-A41R-01	BLCA	Tumor	4.01793	II	≥65	Female
TCGA-XF-AAN3-01	BLCA	Tumor	2.72681	IV	≥65	Male
TCGA-KQ-A41Q-01	BLCA	Tumor	1.80735	III	≥65	Male
TCGA-SY-A9G5-01	BLCA	Tumor	3.63688	III	≥65	Male
TCGA-4Z-AA89-01	BLCA	Tumor	2.72469	IV	<65	Male
TCGA-C4-A0F0-01	BLCA	Tumor	2.45678	II	<65	Male
TCGA-K4-AAQO-01	BLCA	Tumor	4.03126	III	<65	Male
TCGA-E7-A7DU-01	BLCA	Tumor	2.47513	III	≥65	Male
TCGA-DK-A1A3-01	BLCA	Tumor	6.02254	IV	<65	Male
TCGA-KQ-A41N-01	BLCA	Tumor	3.80424	III	≥65	Male
TCGA-XF-A9T6-01	BLCA	Tumor	3.45809	III	≥65	Female
TCGA-DK-A2I4-01	BLCA	Tumor	5.24336	III	≥65	Male
TCGA-BT-A42E-01	BLCA	Tumor	3.17314	III	≥65	Male
TCGA-FD-A43P-01	BLCA	Tumor	5.09082	II	≥65	Male
TCGA-FD-A3SJ-01	BLCA	Tumor	2.51099	IV	<65	Male
TCGA-HQ-A2OE-01	BLCA	Tumor	3.85398	NA	≥65	Male
TCGA-UY-A78O-01	BLCA	Tumor	4.42157	II	≥65	Female
TCGA-BT-A20T-01	BLCA	Tumor	3.26151	IV	<65	Male
TCGA-YC-A8S6-01	BLCA	Tumor	2.52106	II	≥65	Male
TCGA-E7-A5KF-01	BLCA	Tumor	2.52858	II	≥65	Male
TCGA-BL-A13J-01	BLCA	Tumor	2.46812	IV	≥65	Male
TCGA-DK-AA6R-01	BLCA	Tumor	4.09594	IV	≥65	Male
TCGA-G2-A2EJ-01	BLCA	Tumor	2.89532	II	<65	Female
TCGA-FD-A3SN-01	BLCA	Tumor	4.08408	III	≥65	Male
TCGA-G2-A3VY-01	BLCA	Tumor	4.17073	II	≥65	Male
TCGA-ZF-AA4X-01	BLCA	Tumor	6.34464	II	<65	Male
TCGA-DK-A3IK-01	BLCA	Tumor	2.35052	IV	≥65	Male
TCGA-XF-AAMY-01	BLCA	Tumor	3.03563	III	≥65	Male
TCGA-FD-A5C0-01	BLCA	Tumor	4.82989	IV	<65	Male
TCGA-XF-A8HI-01	BLCA	Tumor	3.24486	IV	<65	Female
TCGA-GV-A40E-01	BLCA	Tumor	2.28392	II	≥65	Male
TCGA-CF-A47W-01	BLCA	Tumor	2.95602	II	<65	Male
TCGA-XF-AAN2-01	BLCA	Tumor	3.49186	II	≥65	Male
TCGA-FD-A3B5-01	BLCA	Tumor	4.79179	IV	≥65	Male
TCGA-4Z-AA80-01	BLCA	Tumor	3.42894	II	≥65	Male
TCGA-CF-A3MF-01	BLCA	Tumor	0.731174	III	<65	Male
TCGA-CF-A3MI-01	BLCA	Tumor	1.78243	II	<65	Male
TCGA-G2-A3IE-01	BLCA	Tumor	1.76128	II	<65	Male
TCGA-4Z-AA84-01	BLCA	Tumor	2.36179	IV	<65	Male
TCGA-ZF-A9R2-01	BLCA	Tumor	3.11602	II	≥65	Male
TCGA-C4-A0F1-01	BLCA	Tumor	2.31908	III	≥65	Male
TCGA-DK-A6AV-01	BLCA	Tumor	3.68256	II	≥65	Female
TCGA-XF-A9SH-01	BLCA	Tumor	1.55582	II	≥65	Female
TCGA-DK-AA6W-01	BLCA	Tumor	3.83798	II	≥65	Male
TCGA-R3-A69X-01	BLCA	Tumor	5.35193	III	≥65	Male
TCGA-FD-A3B6-01	BLCA	Tumor	2.43832	II	≥65	Male
TCGA-ZF-AA5P-01	BLCA	Tumor	3.706	IV	≥65	Male
TCGA-GU-A42Q-01	BLCA	Tumor	2.90302	III	≥65	Male
TCGA-HQ-A2OF-01	BLCA	Tumor	2.52858	III	<65	Female
TCGA-2F-A9KR-01	BLCA	Tumor	4.18982	III	<65	Female
TCGA-CF-A5U8-01	BLCA	Tumor	2.10096	II	<65	Male
TCGA-BT-A20R-01	BLCA	Tumor	5.77791	IV	≥65	Female
TCGA-XF-AAML-01	BLCA	Tumor	4.85797	II	≥65	Male
TCGA-GV-A3QK-01	BLCA	Tumor	2.65076	IV	<65	Female
TCGA-E7-A6MD-01	BLCA	Tumor	2.43024	IV	≥65	Male
TCGA-BL-A0C8-01	BLCA	Tumor	1.93736	I	≥65	Male
TCGA-FD-A6TG-01	BLCA	Tumor	2.96902	IV	≥65	Male
TCGA-GU-A766-01	BLCA	Tumor	2.15379	II	<65	Male
TCGA-BT-A20Q-01	BLCA	Tumor	3.03211	IV	≥65	Male
TCGA-XF-A9T4-01	BLCA	Tumor	3.10435	IV	<65	Male
TCGA-GD-A6C6-01	BLCA	Tumor	2.0738	III	<65	Male
TCGA-BT-A20U-01	BLCA	Tumor	2.56314	III	≥65	Female
TCGA-FD-A6TK-01	BLCA	Tumor	3.56191	III	<65	Male
TCGA-K4-A3WV-01	BLCA	Tumor	3.7463	II	≥65	Female
TCGA-DK-A3X2-01	BLCA	Tumor	7.32005	IV	≥65	Male
TCGA-CF-A9FM-01	BLCA	Tumor	1.31616	I	<65	Male
TCGA-CU-A3YL-01	BLCA	Tumor	2.43562	III	≥65	Male
TCGA-ZF-A9R3-01	BLCA	Tumor	4.06612	II	<65	Female
TCGA-DK-AA6M-01	BLCA	Tumor	4.62589	II	<65	Female
TCGA-CF-A47Y-01	BLCA	Tumor	1.80735	II	<65	Male
TCGA-BT-A3PH-01	BLCA	Tumor	3.46855	IV	≥65	Male
TCGA-CF-A3MH-01	BLCA	Tumor	2.81353	II	≥65	Male
TCGA-CF-A27C-01	BLCA	Tumor	2.54348	III	<65	Male
TCGA-BT-A2LA-01	BLCA	Tumor	5.23343	III	<65	Male
TCGA-G2-AA3F-01	BLCA	Tumor	1.49058	IV	≥65	Male
TCGA-FD-A5BZ-01	BLCA	Tumor	3.77928	IV	≥65	Female
TCGA-DK-A1A5-01	BLCA	Tumor	4.10932	II	≥65	Male
TCGA-K4-A5RJ-01	BLCA	Tumor	5.32989	II	≥65	Male
TCGA-XF-A9SY-01	BLCA	Tumor	3.42894	IV	<65	Female
TCGA-CF-A8HX-01	BLCA	Tumor	3.847	II	<65	Female
TCGA-BT-A20J-01	BLCA	Tumor	2.2141	II	≥65	Male
TCGA-DK-A1AF-01	BLCA	Tumor	3.48284	IV	≥65	Female
TCGA-GU-A764-01	BLCA	Tumor	3.05136	II	≥65	Male
TCGA-GC-A6I3-01	BLCA	Tumor	2.02857	IV	≥65	Female
TCGA-DK-A6B1-01	BLCA	Tumor	4.1867	II	≥65	Male
TCGA-FD-A5BY-01	BLCA	Tumor	6.65349	III	<65	Female
TCGA-FD-A43U-01	BLCA	Tumor	2.97818	IV	≥65	Male
TCGA-GV-A3JV-01	BLCA	Tumor	1.87579	IV	≥65	Male
TCGA-E7-A3Y1-01	BLCA	Tumor	2.30454	II	<65	Male
TCGA-GD-A3OS-01	BLCA	Tumor	6.06026	II	<65	Female
TCGA-E7-A97Q-01	BLCA	Tumor	3.55578	IV	<65	Female
TCGA-2F-A9KT-01	BLCA	Tumor	2.88554	II	≥65	Male
TCGA-FD-A6TB-01	BLCA	Tumor	3.37299	III	≥65	Male
TCGA-CF-A5UA-01	BLCA	Tumor	3.84896	II	≥65	Male
TCGA-UY-A8OC-01	BLCA	Tumor	3.19531	IV	≥65	Male
TCGA-GV-A3QG-01	BLCA	Tumor	3.09251	IV	≥65	Male
TCGA-FD-A6TI-01	BLCA	Tumor	2.25704	IV	≥65	Male
TCGA-C4-A0EZ-01	BLCA	Tumor	6.44771	IV	≥65	Female
TCGA-ZF-A9RF-01	BLCA	Tumor	5.59963	II	≥65	Male
TCGA-UY-A78P-01	BLCA	Tumor	4.06612	II	≥65	Female
TCGA-ZF-AA4R-01	BLCA	Tumor	4.77714	IV	≥65	Male
TCGA-DK-A1AE-01	BLCA	Tumor	4.66842	III	≥65	Male
TCGA-DK-A3IU-01	BLCA	Tumor	3.72466	II	<65	Male
TCGA-XF-A9T2-01	BLCA	Tumor	3.03211	III	<65	Male
TCGA-GU-A763-01	BLCA	Tumor	1.95237	III	≥65	Male
TCGA-XF-AAN8-01	BLCA	Tumor	3.41688	III	≥65	Female
TCGA-FD-A5BR-01	BLCA	Tumor	3.11434	II	<65	Male
TCGA-G2-A2EC-01	BLCA	Tumor	2.73122	II	<65	Female
TCGA-LC-A66R-01	BLCA	Tumor	3.729	IV	≥65	Male
TCGA-K4-A4AB-01	BLCA	Tumor	5.05832	III	≥65	Male
TCGA-XF-AAN7-01	BLCA	Tumor	8.43986	IV	<65	Male
TCGA-GV-A3JZ-01	BLCA	Tumor	2.48802	IV	<65	Male
TCGA-4Z-AA7N-01	BLCA	Tumor	2.76767	III	≥65	Male
TCGA-E7-A677-01	BLCA	Tumor	3.58014	II	≥65	Male
TCGA-XF-A9SW-01	BLCA	Tumor	4.9864	IV	≥65	Male
TCGA-DK-A3WX-01	BLCA	Tumor	2.49057	III	≥65	Female
TCGA-G2-AA3C-01	BLCA	Tumor	4.43292	IV	≥65	Male
TCGA-BT-A20N-11	BLCA	Normal	3.87382	III	≥65	Male
TCGA-K4-A54R-11	BLCA	Normal	1.45417	II	<65	Male
TCGA-GC-A3BM-11	BLCA	Normal	2.81971	II	≥65	Male
TCGA-K4-A5RI-11	BLCA	Normal	3.34627	III	≥65	Female
TCGA-CU-A0YR-11	BLCA	Normal	4.8324	IV	≥65	Male
TCGA-BL-A13J-11	BLCA	Normal	4.5472	IV	≥65	Male
TCGA-BT-A20R-11	BLCA	Normal	3.16026	IV	≥65	Female
TCGA-BT-A20Q-11	BLCA	Normal	4.55093	IV	≥65	Male
TCGA-BT-A20U-11	BLCA	Normal	3.53228	III	≥65	Female
TCGA-K4-A3WV-11	BLCA	Normal	3.34338	II	≥65	Female
TCGA-CU-A0YN-11	BLCA	Normal	6.0978	III	<65	Male
TCGA-GC-A6I3-11	BLCA	Normal	3.86199	IV	≥65	Female
TCGA-BT-A2LA-11	BLCA	Normal	1.92597	III	<65	Male
TCGA-GD-A3OQ-11	BLCA	Normal	3.25855	IV	<65	Male
TCGA-GD-A3OP-11	BLCA	Normal	2.72902	IV	≥65	Female
TCGA-BT-A20W-11	BLCA	Normal	3.62998	II	≥65	Male
TCGA-GD-A2C5-11	BLCA	Normal	3.36594	IV	<65	Female
TCGA-BT-A2LB-11	BLCA	Normal	2.63924	III	≥65	Female
TCGA-GC-A3WC-11	BLCA	Normal	4.44627	III	≥65	Female
TCGA-C8-A1HL-01	BRCA	Tumor	3.71921	III	<65	Female
TCGA-EW-A2FS-01	BRCA	Tumor	3.68366	II	<65	Female
TCGA-A2-A3XX-01	BRCA	Tumor	3.96348	II	<65	Female
TCGA-Z7-A8R5-01	BRCA	Tumor	2.12434	III	<65	Female
TCGA-B6-A0RL-01	BRCA	Tumor	4.5185	II	<65	Female
TCGA-E2-A2P6-01	BRCA	Tumor	4.40737	II	≥65	Female
TCGA-AO-A1KT-01	BRCA	Tumor	4.54289	II	≥65	Female
TCGA-E9-A3HO-01	BRCA	Tumor	4.43692	II	<65	Female
TCGA-D8-A1XJ-01	BRCA	Tumor	4.04788	III	≥65	Female
TCGA-AC-A2FK-01	BRCA	Tumor	3.54599	III	<65	Female
TCGA-E9-A1R4-01	BRCA	Tumor	3.73446	I	≥65	Female
TCGA-LL-A740-01	BRCA	Tumor	3.03036	I	<65	Female
TCGA-BH-A0BZ-01	BRCA	Tumor	4.71312	III	<65	Female
TCGA-C8-A3M8-01	BRCA	Tumor	3.0858	I	≥65	Female
TCGA-BH-A0BM-01	BRCA	Tumor	4.24868	II	<65	Female
TCGA-AN-A0XW-01	BRCA	Tumor	3.08748	III	<65	Female
TCGA-E2-A1LL-01	BRCA	Tumor	3.24029	III	≥65	Female
TCGA-BH-A18K-01	BRCA	Tumor	3.67693	I	<65	Female
TCGA-BH-A28O-01	BRCA	Tumor	4.73987	III	<65	Female
TCGA-A7-A4SC-01	BRCA	Tumor	3.2327	II	<65	Female
TCGA-E9-A24A-01	BRCA	Tumor	3.50335	II	≥65	Female
TCGA-AC-A6IV-01	BRCA	Tumor	4.10602	II	<65	Female
TCGA-B6-A400-01	BRCA	Tumor	4.79912	III	<65	Female
TCGA-A8-A096-01	BRCA	Tumor	3.37299	II	≥65	Female
TCGA-E2-A1LH-01	BRCA	Tumor	3.64267	I	<65	Female
TCGA-B6-A0RH-01	BRCA	Tumor	3.37019	II	<65	Female
TCGA-A8-A07W-01	BRCA	Tumor	4.27721	IV	≥65	Female
TCGA-B6-A0X7-01	BRCA	Tumor	4.3512	NA	<65	Female
TCGA-EW-A1P0-01	BRCA	Tumor	2.99277	II	<65	Female
TCGA-EW-A1PC-01	BRCA	Tumor	5.42524	II	≥65	Female
TCGA-A7-A0CH-01	BRCA	Tumor	3.16345	II	≥65	Female
TCGA-E9-A2JS-01	BRCA	Tumor	4.19851	II	≥65	Female
TCGA-A2-A1G6-01	BRCA	Tumor	4.37708	III	<65	Female
TCGA-B6-A0WV-01	BRCA	Tumor	4.27949	II	≥65	Female
TCGA-UL-AAZ6-01	BRCA	Tumor	2.37574	II	≥65	Female
TCGA-B6-A0RG-01	BRCA	Tumor	3.54224	II	<65	Female
TCGA-A7-A0DC-01	BRCA	Tumor	1.50926	I	<65	Female
TCGA-A2-A0CR-01	BRCA	Tumor	3.37434	II	<65	Female
TCGA-GM-A2DD-01	BRCA	Tumor	3.88659	I	<65	Female
TCGA-BH-A6R9-01	BRCA	Tumor	4.26375	II	<65	Female
TCGA-HN-A2OB-01	BRCA	Tumor	4.79285	II	<65	Female
TCGA-UU-A93S-01	BRCA	Tumor	4.71149	IV	<65	Female
TCGA-AR-A24P-01	BRCA	Tumor	4.30378	I	<65	Female
TCGA-E9-A1N9-01	BRCA	Tumor	4.04356	II	<65	Female
TCGA-B6-A0I9-01	BRCA	Tumor	3.2824	IV	<65	Female
TCGA-E2-A1L9-01	BRCA	Tumor	3.45019	II	<65	Female
TCGA-AC-A23H-01	BRCA	Tumor	3.54718	II	≥65	Female
TCGA-AR-A1AP-01	BRCA	Tumor	3.62998	I	≥65	Female
TCGA-BH-A0H5-01	BRCA	Tumor	3.73011	I	<65	Female
TCGA-OK-A5Q2-01	BRCA	Tumor	4.56865	II	<65	Female
TCGA-BH-A0E6-01	BRCA	Tumor	3.36594	I	≥65	Female
TCGA-D8-A1JA-01	BRCA	Tumor	2.75701	NA	<65	Female
TCGA-BH-A0BW-01	BRCA	Tumor	5.77133	I	≥65	Female
TCGA-B6-A0WZ-01	BRCA	Tumor	2.32484	II	<65	Female
TCGA-C8-A135-01	BRCA	Tumor	3.58976	II	<65	Female
TCGA-BH-A0E2-01	BRCA	Tumor	3.11266	III	<65	Female
TCGA-BH-A0BJ-01	BRCA	Tumor	3.71921	II	<65	Female
TCGA-BH-A203-01	BRCA	Tumor	3.01256	II	≥65	Female
TCGA-A2-A1G1-01	BRCA	Tumor	2.71145	II	≥65	Female
TCGA-BH-A0C7-01	BRCA	Tumor	4.79391	II	<65	Female
TCGA-E2-A14X-01	BRCA	Tumor	4.53485	III	<65	Female
TCGA-BH-A8FZ-01	BRCA	Tumor	3.51849	I	<65	Female
TCGA-S3-AA17-01	BRCA	Tumor	3.15218	II	<65	Female
TCGA-AR-A1AR-01	BRCA	Tumor	4.05747	III	<65	Female
TCGA-D8-A13Z-01	BRCA	Tumor	2.83999	NA	<65	Female
TCGA-A7-A6VX-01	BRCA	Tumor	6.17814	II	≥65	Female
TCGA-AR-A255-01	BRCA	Tumor	3.30162	I	<65	Female
TCGA-AR-A1AT-01	BRCA	Tumor	2.88943	II	<65	Female
TCGA-A2-A0CU-01	BRCA	Tumor	3.80526	II	≥65	Female
TCGA-BH-A0AZ-01	BRCA	Tumor	4.01342	III	<65	Female
TCGA-E2-A1IH-01	BRCA	Tumor	3.30009	I	≥65	Female
TCGA-BH-A18R-01	BRCA	Tumor	3.62998	II	<65	Female
TCGA-AC-A4ZE-01	BRCA	Tumor	4.20949	II	<65	Female
TCGA-B6-A0RS-01	BRCA	Tumor	2.15705	II	<65	Female
TCGA-AR-A24H-01	BRCA	Tumor	4.80732	II	≥65	Female
TCGA-A8-A099-01	BRCA	Tumor	2.21104	NA	≥65	Female
TCGA-A8-A09R-01	BRCA	Tumor	3.65187	II	≥65	Female
TCGA-EW-A6SC-01	BRCA	Tumor	4.10687	II	<65	Female
TCGA-D8-A1XC-01	BRCA	Tumor	2.51602	III	≥65	Female
TCGA-EW-A1PE-01	BRCA	Tumor	3.0858	II	<65	Female
TCGA-E2-A1II-01	BRCA	Tumor	4.67467	I	<65	Female
TCGA-S3-AA14-01	BRCA	Tumor	4.04525	I	<65	Female
TCGA-A8-A09B-01	BRCA	Tumor	2.53851	III	<65	Female
TCGA-AR-A5QP-01	BRCA	Tumor	4.69658	II	<65	Female
TCGA-E9-A6HE-01	BRCA	Tumor	4.43692	III	<65	Female
TCGA-BH-A0HI-01	BRCA	Tumor	2.87975	I	≥65	Female
TCGA-EW-A1P1-01	BRCA	Tumor	3.84998	III	≥65	Female
TCGA-OL-A66P-01	BRCA	Tumor	3.58738	II	≥65	Female
TCGA-A2-A1G4-01	BRCA	Tumor	3.44228	III	≥65	Female
TCGA-E2-A105-01	BRCA	Tumor	4.05831	II	≥65	Female
TCGA-E2-A573-01	BRCA	Tumor	4.78765	I	<65	Female
TCGA-A2-A0EV-01	BRCA	Tumor	3.6005	I	≥65	Female
TCGA-A8-A08A-01	BRCA	Tumor	3.26151	I	≥65	Female
TCGA-E9-A1RG-01	BRCA	Tumor	3.82886	III	<65	Female
TCGA-D8-A1XL-01	BRCA	Tumor	4.08408	II	<65	Female
TCGA-A2-A0ER-01	BRCA	Tumor	4.29942	I	<65	Female
TCGA-OL-A66K-01	BRCA	Tumor	3.72466	II	≥65	Female
TCGA-EW-A1OX-01	BRCA	Tumor	1.88753	II	<65	Female
TCGA-S3-AA10-01	BRCA	Tumor	4.34911	II	≥65	Female
TCGA-A8-A0A9-01	BRCA	Tumor	4.10263	II	≥65	Female
TCGA-BH-A1FB-01	BRCA	Tumor	3.24638	II	<65	Female
TCGA-A2-A04T-01	BRCA	Tumor	4.98272	II	<65	Female
TCGA-OL-A5S0-01	BRCA	Tumor	3.55578	II	≥65	Female
TCGA-A8-A07J-01	BRCA	Tumor	4.13666	II	<65	Female
TCGA-E9-A229-01	BRCA	Tumor	3.92411	I	<65	Female
TCGA-A2-A0SX-01	BRCA	Tumor	4.41347	I	<65	Female
TCGA-BH-A0AW-01	BRCA	Tumor	2.75275	II	<65	Female
TCGA-BH-A2L8-01	BRCA	Tumor	3.62529	II	<65	Female
TCGA-BH-A0B6-01	BRCA	Tumor	3.2327	I	<65	Female
TCGA-AO-A0JL-01	BRCA	Tumor	3.44492	III	<65	Female
TCGA-BH-A0BS-01	BRCA	Tumor	3.211	III	<65	Female
TCGA-B6-A0IG-01	BRCA	Tumor	3.13258	II	<65	Female
TCGA-OL-A66L-01	BRCA	Tumor	3.30593	I	≥65	Female
TCGA-BH-A0DO-01	BRCA	Tumor	2.90493	I	≥65	Female
TCGA-LL-A73Y-01	BRCA	Tumor	4.27949	I	≥65	Female
TCGA-BH-A0DK-01	BRCA	Tumor	3.57409	II	<65	Female
TCGA-BH-A0BG-01	BRCA	Tumor	4.74574	I	≥65	Female
TCGA-A8-A06Z-01	BRCA	Tumor	3.87084	II	≥65	Female
TCGA-AN-A0AT-01	BRCA	Tumor	3.68929	II	<65	Female
TCGA-E2-A14U-01	BRCA	Tumor	1.94859	I	≥65	Female
TCGA-AR-A24Q-01	BRCA	Tumor	4.56923	II	<65	Female
TCGA-EW-A1P5-01	BRCA	Tumor	3.76019	II	≥65	Female
TCGA-BH-A1FN-01	BRCA	Tumor	4.40394	II	<65	Female
TCGA-A7-A4SE-01	BRCA	Tumor	3.51219	II	<65	Female
TCGA-A1-A0SJ-01	BRCA	Tumor	4.47768	III	<65	Female
TCGA-E2-A570-01	BRCA	Tumor	4.41213	I	<65	Female
TCGA-BH-A201-01	BRCA	Tumor	2.57046	I	<65	Female
TCGA-A8-A09E-01	BRCA	Tumor	3.04441	III	≥65	Female
TCGA-D8-A27V-01	BRCA	Tumor	4.41614	II	<65	Female
TCGA-E2-A14Y-01	BRCA	Tumor	2.44893	II	<65	Female
TCGA-MS-A51U-01	BRCA	Tumor	3.85296	II	<65	Female
TCGA-A8-A06Y-01	BRCA	Tumor	2.66675	II	≥65	Female
TCGA-GI-A2C8-01	BRCA	Tumor	2.95794	III	<65	Female
TCGA-AR-A1AM-01	BRCA	Tumor	4.32335	III	<65	Female
TCGA-AN-A041-01	BRCA	Tumor	2.74415	II	<65	Female
TCGA-B6-A409-01	BRCA	Tumor	4.14401	III	<65	Female
TCGA-BH-A1EX-01	BRCA	Tumor	3.01974	II	≥65	Female
TCGA-A7-A0CJ-01	BRCA	Tumor	2.24187	II	<65	Female
TCGA-BH-A0H0-01	BRCA	Tumor	2.96535	I	≥65	Female
TCGA-LL-A5YO-01	BRCA	Tumor	4.24262	I	<65	Female
TCGA-AN-A0FW-01	BRCA	Tumor	4.10018	III	≥65	Female
TCGA-AC-A6IX-01	BRCA	Tumor	4.78765	III	<65	Female
TCGA-A2-A04Y-01	BRCA	Tumor	3.466	II	<65	Female
TCGA-E2-A156-01	BRCA	Tumor	2.57529	I	<65	Female
TCGA-AR-A24R-01	BRCA	Tumor	3.83286	III	<65	Female
TCGA-D8-A1JP-01	BRCA	Tumor	5.13054	I	≥65	Female
TCGA-E2-A1IK-01	BRCA	Tumor	3.71921	II	≥65	Female
TCGA-AN-A0FS-01	BRCA	Tumor	3.94486	I	<65	Female
TCGA-AC-A3TM-01	BRCA	Tumor	3.90497	III	<65	Female
TCGA-C8-A12K-01	BRCA	Tumor	5.18468	II	≥65	Female
TCGA-AR-A2LE-01	BRCA	Tumor	1.51603	I	≥65	Female
TCGA-BH-A0HK-01	BRCA	Tumor	2.9616	II	≥65	Female
TCGA-AR-A250-01	BRCA	Tumor	3.34338	II	<65	Female
TCGA-D8-A1JG-01	BRCA	Tumor	4.14156	II	<65	Female
TCGA-C8-A134-01	BRCA	Tumor	7.03642	II	<65	Female
TCGA-AN-A0FX-01	BRCA	Tumor	4.48609	II	<65	Female
TCGA-AC-A62V-01	BRCA	Tumor	3.89629	IV	<65	Male
TCGA-GM-A3XN-01	BRCA	Tumor	3.50079	III	<65	Female
TCGA-C8-A275-01	BRCA	Tumor	4.08154	II	<65	Female
TCGA-AO-A129-01	BRCA	Tumor	5.43598	II	<65	Female
TCGA-BH-A1F8-01	BRCA	Tumor	2.64151	III	≥65	Female
TCGA-D8-A1JK-01	BRCA	Tumor	3.76659	II	≥65	Female
TCGA-A8-A08X-01	BRCA	Tumor	3.34338	III	<65	Female
TCGA-AR-A2LN-01	BRCA	Tumor	4.05831	II	≥65	Female
TCGA-A8-A09A-01	BRCA	Tumor	3.54471	NA	<65	Female
TCGA-E2-A1IJ-01	BRCA	Tumor	3.52232	I	<65	Female
TCGA-A8-A08O-01	BRCA	Tumor	4.1763	IV	<65	Female
TCGA-A2-A4RY-01	BRCA	Tumor	3.80424	III	<65	Female
TCGA-A2-A0SY-01	BRCA	Tumor	3.88165	III	<65	Female
TCGA-AC-A8OP-01	BRCA	Tumor	4.77078	I	≥65	Female
TCGA-EW-A1PA-01	BRCA	Tumor	3.61592	II	<65	Female
TCGA-AO-A126-01	BRCA	Tumor	4.15458	II	<65	Female
TCGA-AO-A0J6-01	BRCA	Tumor	4.65075	II	<65	Female
TCGA-EW-A6SB-01	BRCA	Tumor	2.75701	II	<65	Female
TCGA-EW-A2FV-01	BRCA	Tumor	4.27276	III	<65	Female
TCGA-AO-A03R-01	BRCA	Tumor	3.78661	II	<65	Female
TCGA-E9-A54X-01	BRCA	Tumor	3.97453	I	≥65	Female
TCGA-AO-A0JB-01	BRCA	Tumor	2.44362	III	<65	Female
TCGA-AC-A3W5-01	BRCA	Tumor	3.86888	II	≥65	Female
TCGA-A7-A13G-01	BRCA	Tumor	2.3051	II	≥65	Female
TCGA-AR-A1AS-01	BRCA	Tumor	2.90883	II	<65	Female
TCGA-C8-A1HJ-01	BRCA	Tumor	3.87876	II	<65	Female
TCGA-D8-A1Y1-01	BRCA	Tumor	4.01164	III	≥65	Female
TCGA-BH-A0DD-01	BRCA	Tumor	4.5951	II	<65	Male
TCGA-A2-A0EN-01	BRCA	Tumor	3.61702	II	≥65	Female
TCGA-E9-A1R2-01	BRCA	Tumor	2.69156	III	<65	Female
TCGA-A8-A08L-01	BRCA	Tumor	4.50903	III	≥65	Female
TCGA-A7-A3RF-01	BRCA	Tumor	3.10939	II	≥65	Female
TCGA-A2-A0D4-01	BRCA	Tumor	4.70427	II	<65	Female
TCGA-EW-A1IW-01	BRCA	Tumor	3.89722	II	≥65	Female
TCGA-AO-A03M-01	BRCA	Tumor	3.90208	I	<65	Female
TCGA-B6-A0IQ-01	BRCA	Tumor	3.27504	III	<65	Female
TCGA-BH-A1EW-01	BRCA	Tumor	3.43566	II	<65	Female
TCGA-BH-A1FG-01	BRCA	Tumor	2.91837	I	≥65	Female
TCGA-AR-A0TS-01	BRCA	Tumor	5.11189	II	<65	Female
TCGA-A2-A0CM-01	BRCA	Tumor	3.843	II	<65	Female
TCGA-A8-A06X-01	BRCA	Tumor	3.9059	II	≥65	Female
TCGA-D8-A140-01	BRCA	Tumor	3.0409	II	<65	Female
TCGA-E9-A1R6-01	BRCA	Tumor	4.07467	II	<65	Female
TCGA-A2-A0CZ-01	BRCA	Tumor	3.52607	II	<65	Female
TCGA-BH-A1FE-01	BRCA	Tumor	3.69381	II	<65	Female
TCGA-AN-A0XS-01	BRCA	Tumor	3.58857	III	<65	Female
TCGA-A2-A04Q-01	BRCA	Tumor	4.09256	I	<65	Female
TCGA-WT-AB41-01	BRCA	Tumor	2.89142	II	<65	Female
TCGA-BH-A0BV-01	BRCA	Tumor	3.03914	II	≥65	Female
TCGA-AC-A5XS-01	BRCA	Tumor	3.99279	II	≥65	Female
TCGA-E2-A109-01	BRCA	Tumor	4.07637	II	<65	Female
TCGA-B6-A1KF-01	BRCA	Tumor	4.03126	II	≥65	Female
TCGA-BH-A1FL-01	BRCA	Tumor	3.92794	II	≥65	Female
TCGA-E9-A1NI-01	BRCA	Tumor	3.57043	II	<65	Female
TCGA-A8-A07R-01	BRCA	Tumor	3.13754	III	≥65	Female
TCGA-AN-A03Y-01	BRCA	Tumor	3.7677	II	≥65	Female
TCGA-BH-A0C1-01	BRCA	Tumor	4.84552	III	<65	Female
TCGA-BH-A1FH-01	BRCA	Tumor	4.34055	IV	<65	Female
TCGA-E2-A572-01	BRCA	Tumor	3.15218	III	≥65	Female
TCGA-A8-A08H-01	BRCA	Tumor	4.56319	II	≥65	Female
TCGA-JL-A3YW-01	BRCA	Tumor	3.53849	II	<65	Female
TCGA-AN-A0XN-01	BRCA	Tumor	3.28096	III	≥65	Female
TCGA-A1-A0SK-01	BRCA	Tumor	5.18945	II	<65	Female
TCGA-AO-A125-01	BRCA	Tumor	3.0215	II	≥65	Female
TCGA-PE-A5DC-01	BRCA	Tumor	4.20863	III	≥65	Female
TCGA-E9-A3X8-01	BRCA	Tumor	3.72679	II	<65	Female
TCGA-BH-A0AU-01	BRCA	Tumor	4.25171	II	<65	Female
TCGA-GM-A2DB-01	BRCA	Tumor	3.36459	II	<65	Female
TCGA-E9-A244-01	BRCA	Tumor	4.37642	II	<65	Female
TCGA-A8-A0AB-01	BRCA	Tumor	4.20088	II	<65	Female
TCGA-A2-A3XV-01	BRCA	Tumor	2.64386	II	<65	Female
TCGA-AN-A04A-01	BRCA	Tumor	2.70705	III	<65	Female
TCGA-E2-A14O-01	BRCA	Tumor	3.36594	III	≥65	Female
TCGA-A2-A0T7-01	BRCA	Tumor	4.00451	II	<65	Female
TCGA-A7-A0D9-01	BRCA	Tumor	3.33914	II	<65	Female
TCGA-GM-A3XL-01	BRCA	Tumor	4.75008	II	<65	Female
TCGA-AO-A0JJ-01	BRCA	Tumor	4.33418	II	<65	Female
TCGA-A2-A0CV-01	BRCA	Tumor	4.39641	II	<65	Female
TCGA-AN-A046-01	BRCA	Tumor	2.41145	II	≥65	Female
TCGA-D8-A1X6-01	BRCA	Tumor	3.61473	III	≥65	Female
TCGA-EW-A3U0-01	BRCA	Tumor	5.03165	III	<65	Female
TCGA-AO-A0JF-01	BRCA	Tumor	4.00723	II	≥65	Female
TCGA-A2-A0T0-01	BRCA	Tumor	4.07891	II	<65	Female
TCGA-BH-A0EA-01	BRCA	Tumor	4.58973	II	≥65	Female
TCGA-D8-A147-01	BRCA	Tumor	5.50841	NA	<65	Female
TCGA-E9-A54Y-01	BRCA	Tumor	3.69381	III	<65	Female
TCGA-LL-A5YN-01	BRCA	Tumor	2.96718	II	<65	Female
TCGA-C8-A26Y-01	BRCA	Tumor	4.98136	II	≥65	Female
TCGA-AN-A0FJ-01	BRCA	Tumor	2.99636	IV	<65	Female
TCGA-BH-A1EV-01	BRCA	Tumor	2.58737	III	<65	Female
TCGA-AO-A03V-01	BRCA	Tumor	3.20636	I	<65	Female
TCGA-B6-A0IK-01	BRCA	Tumor	3.14401	III	<65	Female
TCGA-E2-A15E-01	BRCA	Tumor	3.63577	II	<65	Female
TCGA-E2-A15D-01	BRCA	Tumor	3.78346	II	<65	Female
TCGA-E9-A1RB-01	BRCA	Tumor	3.25998	II	<65	Female
TCGA-AO-A1KR-01	BRCA	Tumor	1.80321	II	<65	Female
TCGA-BH-A18H-01	BRCA	Tumor	2.78244	I	<65	Female
TCGA-BH-A0HF-01	BRCA	Tumor	3.56072	I	≥65	Female
TCGA-C8-A12M-01	BRCA	Tumor	4.26157	II	≥65	Female
TCGA-C8-A26V-01	BRCA	Tumor	3.56072	III	<65	Female
TCGA-B6-A1KN-01	BRCA	Tumor	3.23573	III	<65	Female
TCGA-A7-A4SA-01	BRCA	Tumor	4.13666	II	<65	Female
TCGA-E2-A15S-01	BRCA	Tumor	5.47967	II	<65	Female
TCGA-E9-A1RI-01	BRCA	Tumor	3.41688	III	<65	Female
TCGA-GM-A2DI-01	BRCA	Tumor	3.54224	I	<65	Female
TCGA-A8-A09T-01	BRCA	Tumor	3.04617	NA	≥65	Female
TCGA-D8-A27T-01	BRCA	Tumor	3.56686	III	<65	Female
TCGA-C8-A278-01	BRCA	Tumor	2.87378	III	<65	Female
TCGA-A8-A09C-01	BRCA	Tumor	3.62061	NA	≥65	Female
TCGA-BH-A18L-01	BRCA	Tumor	4.56319	III	<65	Female
TCGA-GM-A2DK-01	BRCA	Tumor	3.65077	I	<65	Female
TCGA-E9-A22A-01	BRCA	Tumor	3.59096	II	≥65	Female
TCGA-AC-A3YJ-01	BRCA	Tumor	3.07557	II	≥65	Female
TCGA-AR-A2LO-01	BRCA	Tumor	3.89722	II	<65	Female
TCGA-AC-A23C-01	BRCA	Tumor	3.39234	II	<65	Female
TCGA-D8-A1XM-01	BRCA	Tumor	4.48351	I	<65	Female
TCGA-BH-A1EU-01	BRCA	Tumor	4.09171	I	≥65	Female
TCGA-PE-A5DD-01	BRCA	Tumor	3.66338	II	<65	Female
TCGA-WT-AB44-01	BRCA	Tumor	3.3277	I	≥65	Female
TCGA-C8-A8HR-01	BRCA	Tumor	4.31613	III	<65	Female
TCGA-A2-A0YG-01	BRCA	Tumor	3.39369	III	<65	Female
TCGA-A8-A09G-01	BRCA	Tumor	3.85799	III	≥65	Female
TCGA-EW-A6SA-01	BRCA	Tumor	3.74306	II	<65	Male
TCGA-AC-A8OQ-01	BRCA	Tumor	3.72679	II	≥65	Female
TCGA-A1-A0SO-01	BRCA	Tumor	4.65709	II	≥65	Female
TCGA-E2-A10B-01	BRCA	Tumor	3.04617	II	≥65	Female
TCGA-D8-A1XA-01	BRCA	Tumor	3.55825	I	<65	Female
TCGA-AO-A1KQ-01	BRCA	Tumor	3.5059	III	≥65	Male
TCGA-A8-A0A6-01	BRCA	Tumor	3.16345	III	<65	Female
TCGA-AQ-A04J-01	BRCA	Tumor	4.91508	II	<65	Female
TCGA-BH-A0W4-01	BRCA	Tumor	3.68486	II	<65	Female
TCGA-D8-A1X5-01	BRCA	Tumor	2.61117	III	≥65	Female
TCGA-GM-A3XG-01	BRCA	Tumor	2.5993	III	<65	Female
TCGA-A2-A4RW-01	BRCA	Tumor	4.0259	III	<65	Female
TCGA-D8-A1XV-01	BRCA	Tumor	2.9542	II	≥65	Female
TCGA-D8-A13Y-01	BRCA	Tumor	8.15287	I	<65	Female
TCGA-AR-A0TU-01	BRCA	Tumor	4.69322	II	<65	Female
TCGA-BH-A0B0-01	BRCA	Tumor	4.61533	I	<65	Female
TCGA-E2-A15P-01	BRCA	Tumor	3.24638	I	<65	Female
TCGA-D8-A1JN-01	BRCA	Tumor	2.70705	III	≥65	Female
TCGA-BH-A0B8-01	BRCA	Tumor	3.40872	I	<65	Female
TCGA-E9-A1RD-01	BRCA	Tumor	3.10603	II	≥65	Female
TCGA-AC-A2FG-01	BRCA	Tumor	3.96161	II	≥65	Female
TCGA-A2-A0ET-01	BRCA	Tumor	3.73122	III	<65	Female
TCGA-E2-A15R-01	BRCA	Tumor	3.29865	II	<65	Female
TCGA-A2-A3KD-01	BRCA	Tumor	4.16827	III	<65	Female
TCGA-E9-A1NG-01	BRCA	Tumor	3.12266	II	<65	Female
TCGA-AC-A6NO-01	BRCA	Tumor	3.98549	II	<65	Female
TCGA-A8-A08J-01	BRCA	Tumor	3.45282	IV	<65	Female
TCGA-A2-A0CO-01	BRCA	Tumor	4.0934	II	≥65	Female
TCGA-AN-A0FZ-01	BRCA	Tumor	2.49312	III	<65	Female
TCGA-A2-A0YD-01	BRCA	Tumor	3.49186	II	<65	Female
TCGA-EW-A1J2-01	BRCA	Tumor	3.28689	NA	<65	Female
TCGA-C8-A12N-01	BRCA	Tumor	2.99277	II	<65	Female
TCGA-A2-A25F-01	BRCA	Tumor	4.11101	II	≥65	Female
TCGA-A8-A0A1-01	BRCA	Tumor	3.59334	II	≥65	Female
TCGA-D8-A27E-01	BRCA	Tumor	2.16031	I	≥65	Female
TCGA-EW-A1IZ-01	BRCA	Tumor	3.75704	III	<65	Female
TCGA-B6-A0IB-01	BRCA	Tumor	4.25778	IV	<65	Female
TCGA-A8-A08Z-01	BRCA	Tumor	3.64847	NA	≥65	Female
TCGA-AC-A3QQ-01	BRCA	Tumor	2.94345	I	<65	Female
TCGA-E2-A15T-01	BRCA	Tumor	4.44694	II	≥65	Female
TCGA-BH-A0BC-01	BRCA	Tumor	2.82778	III	<65	Female
TCGA-AR-A0TV-01	BRCA	Tumor	4.63107	II	≥65	Female
TCGA-E2-A154-01	BRCA	Tumor	2.99461	I	≥65	Female
TCGA-GM-A4E0-01	BRCA	Tumor	4.01877	III	≥65	Female
TCGA-AO-A124-01	BRCA	Tumor	4.47052	II	<65	Female
TCGA-S3-A6ZF-01	BRCA	Tumor	4.07637	II	<65	Female
TCGA-A8-A09D-01	BRCA	Tumor	4.11271	II	<65	Female
TCGA-AN-A0XO-01	BRCA	Tumor	3.51347	III	<65	Female
TCGA-BH-A0DQ-01	BRCA	Tumor	4.06612	II	<65	Female
TCGA-A2-A4S3-01	BRCA	Tumor	3.58976	II	<65	Female
TCGA-A2-A0D1-01	BRCA	Tumor	1.98551	II	≥65	Female
TCGA-AO-A0J3-01	BRCA	Tumor	3.80526	II	≥65	Female
TCGA-A2-A0ST-01	BRCA	Tumor	3.44492	II	<65	Female
TCGA-E9-A1RE-01	BRCA	Tumor	3.53484	III	≥65	Female
TCGA-A2-A25A-01	BRCA	Tumor	4.30084	II	<65	Female
TCGA-C8-A1HK-01	BRCA	Tumor	2.89722	II	<65	Female
TCGA-AR-A0TR-01	BRCA	Tumor	2.50843	II	≥65	Female
TCGA-AC-A2B8-01	BRCA	Tumor	3.07725	II	≥65	Female
TCGA-E2-A1LG-01	BRCA	Tumor	4.16988	II	<65	Female
TCGA-A7-A6VW-01	BRCA	Tumor	3.45682	II	<65	Female
TCGA-AC-A3W7-01	BRCA	Tumor	3.73548	II	≥65	Female
TCGA-E2-A1LK-01	BRCA	Tumor	3.25094	III	≥65	Female
TCGA-B6-A0RT-01	BRCA	Tumor	4.4561	III	<65	Female
TCGA-BH-A0HB-01	BRCA	Tumor	3.37154	I	<65	Female
TCGA-C8-A3M7-01	BRCA	Tumor	4.36947	III	<65	Female
TCGA-D8-A1Y3-01	BRCA	Tumor	2.41682	III	<65	Female
TCGA-A8-A07C-01	BRCA	Tumor	4.92175	II	<65	Female
TCGA-A8-A06U-01	BRCA	Tumor	2.93922	II	≥65	Female
TCGA-GI-A2C9-01	BRCA	Tumor	4.86396	II	<65	Female
TCGA-D8-A73W-01	BRCA	Tumor	3.09763	III	≥65	Female
TCGA-E9-A245-01	BRCA	Tumor	3.36874	II	<65	Female
TCGA-B6-A0X0-01	BRCA	Tumor	2.06002	I	<65	Female
TCGA-A8-A06Q-01	BRCA	Tumor	3.48029	III	<65	Female
TCGA-E9-A1R0-01	BRCA	Tumor	4.14977	II	<65	Female
TCGA-B6-A0RO-01	BRCA	Tumor	3.05136	III	≥65	Female
TCGA-E9-A1NA-01	BRCA	Tumor	3.79802	II	<65	Female
TCGA-BH-A0DZ-01	BRCA	Tumor	3.22653	II	<65	Female
TCGA-AN-A0XP-01	BRCA	Tumor	2.85998	III	≥65	Female
TCGA-EW-A6S9-01	BRCA	Tumor	4.12845	II	<65	Female
TCGA-AQ-A54O-01	BRCA	Tumor	3.03914	II	<65	Male
TCGA-BH-A0WA-01	BRCA	Tumor	4.41147	I	≥65	Female
TCGA-BH-AB28-01	BRCA	Tumor	3.16186	III	<65	Female
TCGA-A8-A09N-01	BRCA	Tumor	4.49823	III	<65	Female
TCGA-E2-A15A-01	BRCA	Tumor	3.65077	III	<65	Female
TCGA-E9-A2JT-01	BRCA	Tumor	4.0934	II	<65	Female
TCGA-BH-A0HQ-01	BRCA	Tumor	4.14156	II	<65	Female
TCGA-E2-A3DX-01	BRCA	Tumor	3.87084	III	<65	Female
TCGA-E2-A1L6-01	BRCA	Tumor	3.5173	II	<65	Female
TCGA-B6-A0I2-01	BRCA	Tumor	4.01436	I	<65	Female
TCGA-D8-A73X-01	BRCA	Tumor	3.33482	II	<65	Female
TCGA-A8-A084-01	BRCA	Tumor	3.48412	II	≥65	Female
TCGA-A7-A2KD-01	BRCA	Tumor	4.47119	III	<65	Female
TCGA-AR-A252-01	BRCA	Tumor	3.96441	I	<65	Female
TCGA-AR-A24L-01	BRCA	Tumor	3.92318	II	<65	Female
TCGA-AN-A0XR-01	BRCA	Tumor	3.05655	III	<65	Female
TCGA-BH-A18V-01	BRCA	Tumor	3.87475	II	<65	Female
TCGA-B6-A0WY-01	BRCA	Tumor	2.97268	III	<65	Female
TCGA-EW-A423-01	BRCA	Tumor	3.83491	II	≥65	Female
TCGA-C8-A12X-01	BRCA	Tumor	2.5777	II	<65	Female
TCGA-E9-A5UO-01	BRCA	Tumor	4.58494	II	<65	Female
TCGA-BH-A18U-01	BRCA	Tumor	3.76445	III	≥65	Female
TCGA-BH-A0C0-01	BRCA	Tumor	3.56805	II	<65	Female
TCGA-A8-A09I-01	BRCA	Tumor	2.04264	II	≥65	Female
TCGA-E9-A22D-01	BRCA	Tumor	4.12185	II	<65	Female
TCGA-E2-A1LE-01	BRCA	Tumor	3.65418	III	≥65	Female
TCGA-E2-A15F-01	BRCA	Tumor	3.6915	I	<65	Female
TCGA-D8-A27L-01	BRCA	Tumor	3.37714	III	<65	Female
TCGA-C8-A12O-01	BRCA	Tumor	3.68486	II	<65	Female
TCGA-D8-A1XG-01	BRCA	Tumor	3.40329	III	≥65	Female
TCGA-C8-A8HQ-01	BRCA	Tumor	3.94673	II	<65	Female
TCGA-E2-A15M-01	BRCA	Tumor	3.96535	II	≥65	Female
TCGA-A8-A083-01	BRCA	Tumor	3.0286	II	≥65	Female
TCGA-AC-A3TN-01	BRCA	Tumor	2.36461	II	≥65	Female
TCGA-B6-A0IC-01	BRCA	Tumor	4.25626	NA	≥65	Female
TCGA-A2-A0CW-01	BRCA	Tumor	3.23109	II	≥65	Female
TCGA-A8-A092-01	BRCA	Tumor	4.04525	III	<65	Female
TCGA-D8-A1XS-01	BRCA	Tumor	4.20324	III	<65	Male
TCGA-BH-A18Q-01	BRCA	Tumor	5.72001	II	<65	Female
TCGA-AO-A12B-01	BRCA	Tumor	4.5097	II	<65	Female
TCGA-AC-A3EH-01	BRCA	Tumor	3.08068	III	≥65	Female
TCGA-A7-A26F-01	BRCA	Tumor	2.65076	I	<65	Female
TCGA-BH-A0B2-01	BRCA	Tumor	3.76974	NA	NA	NA
TCGA-AO-A12F-01	BRCA	Tumor	2.57046	II	<65	Female
TCGA-EW-A1P6-01	BRCA	Tumor	3.64957	II	<65	Female
TCGA-GM-A2DF-01	BRCA	Tumor	4.64499	II	<65	Female
TCGA-A8-A09Q-01	BRCA	Tumor	4.14817	III	≥65	Female
TCGA-AC-A2FF-01	BRCA	Tumor	5.13666	II	<65	Female
TCGA-BH-A18J-01	BRCA	Tumor	3.07892	IV	<65	Female
TCGA-C8-A12W-01	BRCA	Tumor	3.69381	III	<65	Female
TCGA-A2-A0YJ-01	BRCA	Tumor	3.71477	III	<65	Female
TCGA-D8-A1XD-01	BRCA	Tumor	3.466	III	<65	Female
TCGA-AQ-A1H2-01	BRCA	Tumor	3.39505	III	≥65	Female
TCGA-AR-A24O-01	BRCA	Tumor	4.50396	III	<65	Female
TCGA-A8-A0AD-01	BRCA	Tumor	3.81455	I	≥65	Female
TCGA-A7-A3J1-01	BRCA	Tumor	3.95796	I	<65	Female
TCGA-A2-A0EQ-01	BRCA	Tumor	3.91076	II	<65	Female
TCGA-B6-A402-01	BRCA	Tumor	3.43166	I	<65	Female
TCGA-LD-A7W6-01	BRCA	Tumor	3.40329	II	<65	Female
TCGA-BH-A1FR-01	BRCA	Tumor	4.47052	III	≥65	Female
TCGA-A8-A08B-01	BRCA	Tumor	1.94859	II	<65	Female
TCGA-D8-A1XK-01	BRCA	Tumor	6.42645	II	<65	Female
TCGA-3C-AAAU-01	BRCA	Tumor	4.79131	NA	<65	Female
TCGA-BH-A0BT-01	BRCA	Tumor	4.23419	II	<65	Female
TCGA-AO-A03U-01	BRCA	Tumor	3.39234	I	<65	Female
TCGA-OL-A66H-01	BRCA	Tumor	4.00451	I	NA	Female
TCGA-AR-A1AJ-01	BRCA	Tumor	3.98549	I	≥65	Female
TCGA-E9-A5UP-01	BRCA	Tumor	3.18587	II	<65	Female
TCGA-AC-A8OS-01	BRCA	Tumor	4.03567	II	≥65	Female
TCGA-BH-A0DT-01	BRCA	Tumor	3.74205	II	<65	Female
TCGA-LL-A7SZ-01	BRCA	Tumor	3.22037	II	<65	Female
TCGA-AN-A0G0-01	BRCA	Tumor	4.81194	II	<65	Female
TCGA-E2-A14Q-01	BRCA	Tumor	3.89237	II	<65	Female
TCGA-A2-A1FZ-01	BRCA	Tumor	3.61234	II	<65	Female
TCGA-OL-A5D6-01	BRCA	Tumor	2.73768	II	≥65	Female
TCGA-BH-A0B9-01	BRCA	Tumor	3.34482	I	<65	Female
TCGA-AR-A1AQ-01	BRCA	Tumor	3.24181	II	<65	Female
TCGA-E9-A226-01	BRCA	Tumor	4.02412	III	<65	Female
TCGA-E9-A1NF-01	BRCA	Tumor	3.18907	II	<65	Female
TCGA-BH-A0DL-01	BRCA	Tumor	3.52232	II	<65	Female
TCGA-A2-A4S1-01	BRCA	Tumor	4.86589	II	≥65	Female
TCGA-E2-A1B0-01	BRCA	Tumor	2.97818	III	<65	Female
TCGA-C8-A26W-01	BRCA	Tumor	4.5951	II	<65	Female
TCGA-D8-A1JH-01	BRCA	Tumor	3.26751	I	<65	Female
TCGA-AO-A12D-01	BRCA	Tumor	2.91265	II	<65	Female
TCGA-AC-A2FM-01	BRCA	Tumor	3.74843	II	≥65	Female
TCGA-E9-A3Q9-01	BRCA	Tumor	3.67924	III	≥65	Female
TCGA-AN-A0AL-01	BRCA	Tumor	4.95929	III	<65	Female
TCGA-B6-A0WW-01	BRCA	Tumor	3.30009	NA	<65	Female
TCGA-OL-A5RZ-01	BRCA	Tumor	2.65076	I	<65	Female
TCGA-D8-A1JL-01	BRCA	Tumor	5.68538	II	≥65	Female
TCGA-A7-A0DB-01	BRCA	Tumor	2.35518	II	<65	Female
TCGA-AR-A1AV-01	BRCA	Tumor	2.57529	II	≥65	Male
TCGA-D8-A1JC-01	BRCA	Tumor	3.39641	III	<65	Female
TCGA-EW-A1OW-01	BRCA	Tumor	5.2091	II	<65	Female
TCGA-B6-A2IU-01	BRCA	Tumor	3.03738	II	<65	Female
TCGA-C8-A137-01	BRCA	Tumor	2.76767	II	<65	Female
TCGA-C8-A1HN-01	BRCA	Tumor	4.75431	II	<65	Female
TCGA-E2-A1L8-01	BRCA	Tumor	2.97635	II	<65	Female
TCGA-A7-A26J-01	BRCA	Tumor	2.86922	II	<65	Female
TCGA-BH-A0E7-01	BRCA	Tumor	2.41145	II	≥65	Female
TCGA-D8-A73U-01	BRCA	Tumor	2.96535	II	≥65	Female
TCGA-D8-A27N-01	BRCA	Tumor	3.41008	III	<65	Female
TCGA-LL-A8F5-01	BRCA	Tumor	5.81483	II	<65	Female
TCGA-C8-A8HP-01	BRCA	Tumor	3.17635	III	<65	Female
TCGA-BH-A6R8-01	BRCA	Tumor	2.98735	II	<65	Female
TCGA-BH-A202-01	BRCA	Tumor	4.5699	II	<65	Female
TCGA-OL-A5RY-01	BRCA	Tumor	3.8659	II	<65	Female
TCGA-OL-A66I-01	BRCA	Tumor	5.50108	II	<65	Female
TCGA-C8-A12V-01	BRCA	Tumor	4.07552	II	<65	Female
TCGA-A7-A26E-01	BRCA	Tumor	2.51434	III	≥65	Female
TCGA-AO-A03N-01	BRCA	Tumor	3.15218	II	<65	Female
TCGA-BH-A42T-01	BRCA	Tumor	3.65307	II	≥65	Female
TCGA-BH-A0HO-01	BRCA	Tumor	3.55706	II	<65	Female
TCGA-A8-A09X-01	BRCA	Tumor	2.90493	III	<65	Female
TCGA-AR-A254-01	BRCA	Tumor	3.25855	III	<65	Female
TCGA-BH-A0HL-01	BRCA	Tumor	3.45418	II	<65	Female
TCGA-AC-A3HN-01	BRCA	Tumor	4.06179	II	≥65	Female
TCGA-BH-A0H7-01	BRCA	Tumor	3.97911	III	≥65	Female
TCGA-AC-A6IW-01	BRCA	Tumor	4.39165	II	≥65	Female
TCGA-EW-A1J5-01	BRCA	Tumor	3.69492	II	<65	Female
TCGA-OL-A6VO-01	BRCA	Tumor	5.39614	I	<65	Female
TCGA-AC-A23E-01	BRCA	Tumor	3.14401	II	<65	Female
TCGA-EW-A1J1-01	BRCA	Tumor	3.5173	II	<65	Female
TCGA-A8-A09W-01	BRCA	Tumor	5.24716	III	≥65	Female
TCGA-B6-A0IM-01	BRCA	Tumor	3.15218	II	≥65	Female
TCGA-BH-A1F0-01	BRCA	Tumor	4.10857	II	≥65	Female
TCGA-EW-A1PD-01	BRCA	Tumor	4.71206	II	<65	Male
TCGA-D8-A1J8-01	BRCA	Tumor	3.72466	II	≥65	Female
TCGA-B6-A0RV-01	BRCA	Tumor	3.27352	III	<65	Female
TCGA-AR-A24N-01	BRCA	Tumor	4.64095	I	<65	Female
TCGA-AQ-A1H3-01	BRCA	Tumor	4.28395	III	<65	Female
TCGA-C8-A131-01	BRCA	Tumor	3.51603	III	≥65	Female
TCGA-AR-A2LQ-01	BRCA	Tumor	4.51983	II	<65	Female
TCGA-A2-A0EP-01	BRCA	Tumor	4.61648	I	<65	Female
TCGA-BH-A0H3-01	BRCA	Tumor	3.82682	I	<65	Female
TCGA-BH-A1FJ-01	BRCA	Tumor	2.60883	III	≥65	Female
TCGA-B6-A40C-01	BRCA	Tumor	3.73011	II	<65	Female
TCGA-E2-A1IF-01	BRCA	Tumor	4.14241	I	≥65	Female
TCGA-AO-A0JE-01	BRCA	Tumor	3.40872	III	<65	Female
TCGA-S3-AA11-01	BRCA	Tumor	3.01615	II	≥65	Female
TCGA-D8-A27I-01	BRCA	Tumor	4.29942	III	<65	Female
TCGA-AC-A3W6-01	BRCA	Tumor	4.02234	III	≥65	Female
TCGA-AR-A0TX-01	BRCA	Tumor	4.14156	II	<65	Female
TCGA-AO-A0JG-01	BRCA	Tumor	2.94488	III	<65	Female
TCGA-A8-A07L-01	BRCA	Tumor	4.84552	III	<65	Female
TCGA-A2-A0SV-01	BRCA	Tumor	3.96713	IV	<65	Female
TCGA-XX-A899-01	BRCA	Tumor	4.59155	III	<65	Female
TCGA-A7-A5ZW-01	BRCA	Tumor	4.21488	II	<65	Female
TCGA-E9-A1NE-01	BRCA	Tumor	3.7803	II	<65	Female
TCGA-BH-A0BR-01	BRCA	Tumor	3.29281	I	<65	Female
TCGA-Z7-A8R6-01	BRCA	Tumor	4.53045	I	<65	Female
TCGA-OL-A5D8-01	BRCA	Tumor	3.41951	II	<65	Female
TCGA-B6-A0IJ-01	BRCA	Tumor	4.96945	II	<65	Female
TCGA-OL-A5D7-01	BRCA	Tumor	3.93925	II	≥65	Female
TCGA-A2-A1FW-01	BRCA	Tumor	4.3016	III	<65	Female
TCGA-A7-A13H-01	BRCA	Tumor	3.60995	II	<65	Female
TCGA-A2-A0EO-01	BRCA	Tumor	4.20551	I	<65	Female
TCGA-BH-A0BF-01	BRCA	Tumor	3.68486	II	<65	Female
TCGA-AR-A5QN-01	BRCA	Tumor	3.63577	III	≥65	Female
TCGA-AQ-A54N-01	BRCA	Tumor	4.66275	II	<65	Female
TCGA-A2-A04V-01	BRCA	Tumor	3.54718	II	<65	Female
TCGA-E2-A14T-01	BRCA	Tumor	3.50462	II	<65	Female
TCGA-E9-A295-01	BRCA	Tumor	3.45946	II	≥65	Female
TCGA-EW-A1P4-01	BRCA	Tumor	4.83288	II	<65	Female
TCGA-A2-A0T4-01	BRCA	Tumor	4.42424	II	<65	Female
TCGA-BH-A0W3-01	BRCA	Tumor	4.36385	II	<65	Female
TCGA-BH-A42U-01	BRCA	Tumor	3.57528	II	≥65	Female
TCGA-A8-A08G-01	BRCA	Tumor	4.62646	II	<65	Female
TCGA-BH-A0BQ-01	BRCA	Tumor	3.76872	I	<65	Female
TCGA-EW-A1IX-01	BRCA	Tumor	3.42758	II	<65	Female
TCGA-GM-A5PV-01	BRCA	Tumor	3.41416	II	<65	Female
TCGA-B6-A401-01	BRCA	Tumor	3.03738	II	<65	Female
TCGA-C8-A1HG-01	BRCA	Tumor	4.54165	II	<65	Female
TCGA-E2-A10E-01	BRCA	Tumor	3.18426	II	<65	Female
TCGA-A7-A0CG-01	BRCA	Tumor	4.36947	II	≥65	Female
TCGA-A2-A0CS-01	BRCA	Tumor	2.85799	IV	≥65	Female
TCGA-A1-A0SG-01	BRCA	Tumor	3.40736	II	<65	Female
TCGA-E2-A1BD-01	BRCA	Tumor	2.96902	II	<65	Female
TCGA-E2-A14Z-01	BRCA	Tumor	3.17154	I	<65	Female
TCGA-A2-A04R-01	BRCA	Tumor	4.08154	I	<65	Female
TCGA-A7-A425-01	BRCA	Tumor	4.22879	III	≥65	Female
TCGA-E9-A1RF-01	BRCA	Tumor	3.00721	III	≥65	Female
TCGA-B6-A408-01	BRCA	Tumor	3.6229	III	<65	Female
TCGA-AN-A0AM-01	BRCA	Tumor	3.68366	II	<65	Female
TCGA-D8-A1JU-01	BRCA	Tumor	4.17234	I	<65	Female
TCGA-AR-A1AH-01	BRCA	Tumor	5.33486	II	<65	Female
TCGA-BH-A1EN-01	BRCA	Tumor	3.45282	II	≥65	Female
TCGA-E9-A3QA-01	BRCA	Tumor	4.67976	II	<65	Female
TCGA-BH-A0EB-01	BRCA	Tumor	2.91837	I	≥65	Female
TCGA-BH-A1EY-01	BRCA	Tumor	3.74519	II	≥65	Female
TCGA-E2-A574-01	BRCA	Tumor	0.704867	II	<65	Female
TCGA-D8-A1JB-01	BRCA	Tumor	3.26303	II	<65	Female
TCGA-D8-A27P-01	BRCA	Tumor	3.93832	I	<65	Female
TCGA-E9-A5FL-01	BRCA	Tumor	2.82374	II	≥65	Female
TCGA-LL-A5YM-01	BRCA	Tumor	3.07037	III	≥65	Female
TCGA-BH-A1FC-01	BRCA	Tumor	5.21571	II	≥65	Female
TCGA-XX-A89A-01	BRCA	Tumor	3.45282	II	≥65	Female
TCGA-GM-A2DL-01	BRCA	Tumor	3.25398	I	<65	Female
TCGA-AO-A12E-01	BRCA	Tumor	4.87874	II	<65	Female
TCGA-AR-A24S-01	BRCA	Tumor	3.86693	I	<65	Female
TCGA-E2-A15K-01	BRCA	Tumor	4.25323	II	<65	Female
TCGA-AO-A12G-01	BRCA	Tumor	2.82984	II	≥65	Female
TCGA-BH-A0HA-01	BRCA	Tumor	3.64727	I	<65	Female
TCGA-W8-A86G-01	BRCA	Tumor	3.27352	II	≥65	Female
TCGA-E2-A153-01	BRCA	Tumor	3.49314	II	<65	Female
TCGA-AR-A24W-01	BRCA	Tumor	4.62061	II	<65	Female
TCGA-D8-A1JJ-01	BRCA	Tumor	3.16026	II	<65	Female
TCGA-AO-A03P-01	BRCA	Tumor	2.98368	II	<65	Female
TCGA-E2-A158-01	BRCA	Tumor	4.46594	II	<65	Female
TCGA-A8-A079-01	BRCA	Tumor	3.78865	III	≥65	Female
TCGA-BH-A204-01	BRCA	Tumor	3.15058	II	≥65	Female
TCGA-BH-A0B4-01	BRCA	Tumor	3.75278	III	≥65	Male
TCGA-AO-A03T-01	BRCA	Tumor	4.21876	II	<65	Female
TCGA-E9-A1N6-01	BRCA	Tumor	3.24942	II	<65	Female
TCGA-GM-A2DM-01	BRCA	Tumor	3.2327	II	<65	Female
TCGA-A2-A4RX-01	BRCA	Tumor	4.77136	II	≥65	Female
TCGA-D8-A27H-01	BRCA	Tumor	5.32735	II	≥65	Female
TCGA-E9-A1NC-01	BRCA	Tumor	4.39508	II	<65	Female
TCGA-A2-A3XS-01	BRCA	Tumor	4.23495	III	<65	Female
TCGA-AR-A0TZ-01	BRCA	Tumor	3.78132	NA	<65	Female
TCGA-AO-A0J7-01	BRCA	Tumor	2.91265	II	≥65	Female
TCGA-D8-A1XY-01	BRCA	Tumor	3.2234	II	≥65	Female
TCGA-A2-A0CK-01	BRCA	Tumor	4.5404	III	<65	Female
TCGA-AC-A8OR-01	BRCA	Tumor	2.848	I	≥65	Female
TCGA-A2-A0YH-01	BRCA	Tumor	3.27648	III	<65	Female
TCGA-A2-A4S2-01	BRCA	Tumor	3.02501	III	<65	Female
TCGA-AQ-A7U7-01	BRCA	Tumor	3.54965	III	<65	Female
TCGA-E2-A10A-01	BRCA	Tumor	4.13336	II	<65	Female
TCGA-C8-A12P-01	BRCA	Tumor	2.02502	II	<65	Female
TCGA-GM-A5PX-01	BRCA	Tumor	4.0444	II	≥65	Female
TCGA-A7-A13F-01	BRCA	Tumor	2.85196	III	<65	Female
TCGA-D8-A1X9-01	BRCA	Tumor	3.23725	II	≥65	Female
TCGA-AR-A1AN-01	BRCA	Tumor	4.52672	II	<65	Female
TCGA-D8-A1Y0-01	BRCA	Tumor	4.58494	III	≥65	Female
TCGA-EW-A1PG-01	BRCA	Tumor	3.41951	II	<65	Female
TCGA-AN-A0FN-01	BRCA	Tumor	3.72466	I	<65	Female
TCGA-EW-A1PF-01	BRCA	Tumor	3.17955	I	<65	Female
TCGA-AO-A03L-01	BRCA	Tumor	3.44891	III	<65	Female
TCGA-AN-A0FY-01	BRCA	Tumor	4.58139	I	<65	Female
TCGA-AC-A7VC-01	BRCA	Tumor	4.18745	II	<65	Female
TCGA-E9-A1R3-01	BRCA	Tumor	2.48802	III	≥65	Female
TCGA-E2-A1IN-01	BRCA	Tumor	3.3785	I	<65	Female
TCGA-A2-A25E-01	BRCA	Tumor	3.91076	III	<65	Female
TCGA-EW-A1IY-01	BRCA	Tumor	3.39234	I	<65	Female
TCGA-B6-A0X4-01	BRCA	Tumor	3.27504	II	<65	Female
TCGA-D8-A1XQ-01	BRCA	Tumor	4.23419	II	≥65	Female
TCGA-A2-A0CL-01	BRCA	Tumor	4.17149	III	<65	Female
TCGA-C8-A27A-01	BRCA	Tumor	3.45418	II	<65	Female
TCGA-E9-A1R7-01	BRCA	Tumor	3.76344	II	<65	Female
TCGA-E9-A249-01	BRCA	Tumor	3.27648	II	<65	Female
TCGA-A8-A07P-01	BRCA	Tumor	3.50718	II	≥65	Female
TCGA-BH-A1F5-01	BRCA	Tumor	3.84198	II	<65	Female
TCGA-A8-A08F-01	BRCA	Tumor	4.17876	III	<65	Female
TCGA-AC-A5XU-01	BRCA	Tumor	3.98089	II	≥65	Female
TCGA-AN-A0XL-01	BRCA	Tumor	4.14081	II	<65	Female
TCGA-E9-A1ND-01	BRCA	Tumor	3.86199	II	≥65	Female
TCGA-AN-A03X-01	BRCA	Tumor	2.81147	II	≥65	Female
TCGA-A8-A08R-01	BRCA	Tumor	4.62464	II	<65	Female
TCGA-A2-A0YC-01	BRCA	Tumor	3.49314	II	<65	Female
TCGA-GM-A2DC-01	BRCA	Tumor	2.80941	II	<65	Female
TCGA-A2-A3XT-01	BRCA	Tumor	5.93495	II	<65	Female
TCGA-AN-A04C-01	BRCA	Tumor	2.65765	II	<65	Female
TCGA-A2-A0YT-01	BRCA	Tumor	4.25171	III	<65	Female
TCGA-BH-A1EO-01	BRCA	Tumor	3.71477	II	≥65	Female
TCGA-E2-A107-01	BRCA	Tumor	4.39365	III	<65	Female
TCGA-A2-A04W-01	BRCA	Tumor	2.60172	II	<65	Female
TCGA-LD-A74U-01	BRCA	Tumor	3.92318	III	≥65	Female
TCGA-B6-A0I5-01	BRCA	Tumor	3.30162	II	<65	Female
TCGA-BH-A0RX-01	BRCA	Tumor	3.32338	II	<65	Female
TCGA-BH-A0DV-01	BRCA	Tumor	3.99636	III	<65	Female
TCGA-GM-A2DO-01	BRCA	Tumor	3.89433	I	<65	Female
TCGA-A2-A0T1-01	BRCA	Tumor	3.29721	III	<65	Female
TCGA-BH-A1ET-01	BRCA	Tumor	3.22653	I	<65	Female
TCGA-BH-A0EI-01	BRCA	Tumor	3.81047	II	<65	Female
TCGA-E2-A15J-01	BRCA	Tumor	2.30159	I	<65	Female
TCGA-A1-A0SQ-01	BRCA	Tumor	4.81301	II	<65	Female
TCGA-AC-A2QJ-01	BRCA	Tumor	4.33266	III	<65	Female
TCGA-A7-A26H-01	BRCA	Tumor	3.33059	II	≥65	Female
TCGA-E2-A1IL-01	BRCA	Tumor	4.59337	II	≥65	Female
TCGA-AN-A04D-01	BRCA	Tumor	7.05091	II	<65	Female
TCGA-C8-A27B-01	BRCA	Tumor	4.98417	II	<65	Female
TCGA-AN-A0AS-01	BRCA	Tumor	2.55824	III	≥65	Female
TCGA-D8-A4Z1-01	BRCA	Tumor	3.86888	I	≥65	Female
TCGA-A8-A06R-01	BRCA	Tumor	2.79074	II	≥65	Female
TCGA-AO-A1KP-01	BRCA	Tumor	3.79394	II	≥65	Female
TCGA-E9-A1RC-01	BRCA	Tumor	4.26081	III	<65	Female
TCGA-A2-A04N-01	BRCA	Tumor	3.51101	I	≥65	Female
TCGA-BH-A8FY-01	BRCA	Tumor	2.94862	I	≥65	Female
TCGA-A8-A09V-01	BRCA	Tumor	3.59573	II	<65	Female
TCGA-GM-A3NY-01	BRCA	Tumor	2.74202	II	≥65	Female
TCGA-BH-A5J0-01	BRCA	Tumor	3.70046	I	<65	Female
TCGA-B6-A0I6-01	BRCA	Tumor	4.83848	II	<65	Female
TCGA-AO-A0JI-01	BRCA	Tumor	3.74741	II	<65	Female
TCGA-BH-A18I-01	BRCA	Tumor	4.07721	II	<65	Female
TCGA-AO-A0JC-01	BRCA	Tumor	3.55706	II	<65	Female
TCGA-A8-A09Z-01	BRCA	Tumor	3.78559	II	≥65	Female
TCGA-E9-A1RH-01	BRCA	Tumor	3.32338	II	<65	Female
TCGA-GM-A2DH-01	BRCA	Tumor	6.17035	I	<65	Female
TCGA-BH-A1ES-01	BRCA	Tumor	3.99551	II	<65	Female
TCGA-PL-A8LY-01	BRCA	Tumor	3.0858	II	<65	Female
TCGA-OL-A5RW-01	BRCA	Tumor	5.74954	II	<65	Female
TCGA-BH-A18M-01	BRCA	Tumor	3.55825	III	<65	Female
TCGA-E2-A14R-01	BRCA	Tumor	5.22963	II	<65	Female
TCGA-A8-A09M-01	BRCA	Tumor	3.03914	III	≥65	Female
TCGA-A1-A0SN-01	BRCA	Tumor	3.52853	II	<65	Female
TCGA-BH-A18F-01	BRCA	Tumor	4.59932	II	<65	Female
TCGA-AR-A2LM-01	BRCA	Tumor	4.17309	II	<65	Female
TCGA-E2-A10C-01	BRCA	Tumor	3.96713	II	<65	Female
TCGA-AR-A0TW-01	BRCA	Tumor	2.77817	III	<65	Female
TCGA-BH-A0W5-01	BRCA	Tumor	3.46855	II	≥65	Female
TCGA-AR-A24K-01	BRCA	Tumor	3.25703	II	<65	Female
TCGA-BH-A0HY-01	BRCA	Tumor	3.69824	I	<65	Female
TCGA-A2-A0EU-01	BRCA	Tumor	3.38546	I	≥65	Female
TCGA-D8-A1XW-01	BRCA	Tumor	4.08493	II	<65	Female
TCGA-AN-A0FL-01	BRCA	Tumor	3.17635	II	<65	Female
TCGA-PL-A8LZ-01	BRCA	Tumor	5.01924	III	<65	Female
TCGA-LL-A5YP-01	BRCA	Tumor	4.24489	II	<65	Female
TCGA-AC-A2BK-01	BRCA	Tumor	4.75383	III	≥65	Female
TCGA-AC-A7VB-01	BRCA	Tumor	4.44828	II	<65	Female
TCGA-E2-A1IG-01	BRCA	Tumor	3.38266	II	<65	Female
TCGA-AO-A0J2-01	BRCA	Tumor	3.98549	I	<65	Female
TCGA-BH-A28Q-01	BRCA	Tumor	3.06526	II	<65	Female
TCGA-AC-A2FB-01	BRCA	Tumor	3.65307	II	≥65	Female
TCGA-C8-A12L-01	BRCA	Tumor	3.33203	II	≥65	Female
TCGA-3C-AALK-01	BRCA	Tumor	3.42631	I	<65	Female
TCGA-E9-A1QZ-01	BRCA	Tumor	4.6542	II	<65	Female
TCGA-AC-A5EH-01	BRCA	Tumor	3.37714	II	≥65	Female
TCGA-GM-A2D9-01	BRCA	Tumor	3.31762	I	≥65	Female
TCGA-LD-A66U-01	BRCA	Tumor	3.96067	II	<65	Female
TCGA-AO-A1KO-01	BRCA	Tumor	3.02676	II	<65	Female
TCGA-AR-A0TP-01	BRCA	Tumor	5.39819	II	<65	Female
TCGA-A8-A07I-01	BRCA	Tumor	4.11771	III	≥65	Female
TCGA-A2-A0EY-01	BRCA	Tumor	3.14889	II	<65	Female
TCGA-LL-A442-01	BRCA	Tumor	3.87382	II	<65	Female
TCGA-A8-A08I-01	BRCA	Tumor	5.12636	II	<65	Female
TCGA-A8-A091-01	BRCA	Tumor	3.56924	II	<65	Female
TCGA-D8-A1XT-01	BRCA	Tumor	3.70046	II	<65	Female
TCGA-BH-A0DG-01	BRCA	Tumor	3.31906	II	<65	Female
TCGA-AR-A2LL-01	BRCA	Tumor	3.74843	II	≥65	Female
TCGA-4H-AAAK-01	BRCA	Tumor	4.15137	III	<65	Female
TCGA-3C-AALI-01	BRCA	Tumor	3.99458	II	<65	Female
TCGA-A8-A08P-01	BRCA	Tumor	3.6229	III	≥65	Female
TCGA-D8-A1X8-01	BRCA	Tumor	3.83695	III	<65	Female
TCGA-BH-A0E1-01	BRCA	Tumor	4.10687	II	<65	Female
TCGA-S3-A6ZG-01	BRCA	Tumor	4.52978	II	≥65	Female
TCGA-AO-A0J5-01	BRCA	Tumor	3.81251	IV	<65	Female
TCGA-A2-A0EM-01	BRCA	Tumor	3.25551	I	≥65	Female
TCGA-A8-A08T-01	BRCA	Tumor	3.50845	IV	<65	Female
TCGA-S3-AA12-01	BRCA	Tumor	3.42894	III	≥65	Female
TCGA-HN-A2NL-01	BRCA	Tumor	6.26338	II	<65	Female
TCGA-AO-A12A-01	BRCA	Tumor	4.18112	II	<65	Female
TCGA-A2-A0YM-01	BRCA	Tumor	3.07213	II	≥65	Female
TCGA-E2-A9RU-01	BRCA	Tumor	4.05483	III	≥65	Female
TCGA-C8-A130-01	BRCA	Tumor	4.06866	III	<65	Female
TCGA-E2-A1B4-01	BRCA	Tumor	1.97453	III	≥65	Female
TCGA-LL-A73Z-01	BRCA	Tumor	3.5729	IV	<65	Female
TCGA-C8-A1HI-01	BRCA	Tumor	3.8022	III	<65	Female
TCGA-LL-A6FR-01	BRCA	Tumor	4.58733	II	<65	Female
TCGA-PL-A8LV-01	BRCA	Tumor	4.4416	III	<65	Female
TCGA-A8-A07E-01	BRCA	Tumor	5.07898	NA	≥65	Female
TCGA-E9-A247-01	BRCA	Tumor	4.27352	I	<65	Female
TCGA-A2-A3XZ-01	BRCA	Tumor	3.51603	I	<65	Female
TCGA-A8-A07F-01	BRCA	Tumor	3.52735	II	≥65	Female
TCGA-B6-A0RN-01	BRCA	Tumor	2.8258	I	<65	Female
TCGA-LD-A7W5-01	BRCA	Tumor	3.706	III	<65	Female
TCGA-BH-A0BL-01	BRCA	Tumor	4.73121	I	<65	Female
TCGA-AN-A0XV-01	BRCA	Tumor	3.83798	III	≥65	Female
TCGA-A7-A4SB-01	BRCA	Tumor	4.37508	III	<65	Female
TCGA-AN-A0XU-01	BRCA	Tumor	5.88608	II	<65	Female
TCGA-A7-A6VV-01	BRCA	Tumor	4.87333	II	<65	Female
TCGA-E2-A1LI-01	BRCA	Tumor	5.03252	II	<65	Female
TCGA-B6-A0WS-01	BRCA	Tumor	3.10939	NA	<65	Female
TCGA-C8-A138-01	BRCA	Tumor	3.69381	III	<65	Female
TCGA-A7-A426-01	BRCA	Tumor	4.31176	III	<65	Female
TCGA-A7-A56D-01	BRCA	Tumor	2.65303	II	≥65	Female
TCGA-A8-A07B-01	BRCA	Tumor	3.36738	II	≥65	Female
TCGA-A8-A086-01	BRCA	Tumor	3.55459	II	<65	Female
TCGA-BH-A1FU-01	BRCA	Tumor	3.44365	I	<65	Female
TCGA-B6-A0RI-01	BRCA	Tumor	4.17234	III	<65	Female
TCGA-E2-A1B6-01	BRCA	Tumor	5.16271	II	<65	Female
TCGA-E9-A1N4-01	BRCA	Tumor	3.32194	III	<65	Female
TCGA-OL-A66O-01	BRCA	Tumor	4.4436	II	<65	Female
TCGA-A7-A6VY-01	BRCA	Tumor	4.10178	II	<65	Female
TCGA-GM-A2DA-01	BRCA	Tumor	3.87084	II	<65	Female
TCGA-B6-A0I1-01	BRCA	Tumor	3.89825	II	≥65	Female
TCGA-D8-A141-01	BRCA	Tumor	3.26455	NA	<65	Female
TCGA-BH-A0H9-01	BRCA	Tumor	2.66447	II	≥65	Female
TCGA-BH-A18T-01	BRCA	Tumor	2.96902	II	≥65	Female
TCGA-BH-A0BD-01	BRCA	Tumor	3.61822	II	<65	Female
TCGA-OL-A5RU-01	BRCA	Tumor	3.19851	II	<65	Female
TCGA-C8-A12T-01	BRCA	Tumor	3.92411	II	<65	Female
TCGA-A7-A0DA-01	BRCA	Tumor	4.76973	II	<65	Female
TCGA-A2-A25C-01	BRCA	Tumor	3.74741	II	<65	Female
TCGA-E2-A14V-01	BRCA	Tumor	3.03211	II	<65	Female
TCGA-BH-A0HP-01	BRCA	Tumor	3.66108	III	≥65	Female
TCGA-B6-A0I8-01	BRCA	Tumor	2.91265	NA	<65	Female
TCGA-E2-A1L7-01	BRCA	Tumor	5.66077	III	<65	Female
TCGA-E9-A1N8-01	BRCA	Tumor	3.83184	II	<65	Female
TCGA-A8-A085-01	BRCA	Tumor	1.42222	II	<65	Male
TCGA-AR-A0U0-01	BRCA	Tumor	5.25358	II	≥65	Female
TCGA-A7-A0CE-01	BRCA	Tumor	4.59452	II	<65	Female
TCGA-C8-A12Y-01	BRCA	Tumor	3.60646	II	<65	Female
TCGA-AC-A2BM-01	BRCA	Tumor	3.96161	II	<65	Female
TCGA-BH-A0E0-01	BRCA	Tumor	3.54718	III	<65	Female
TCGA-E2-A15G-01	BRCA	Tumor	2.55824	II	≥65	Female
TCGA-D8-A146-01	BRCA	Tumor	3.48029	II	<65	Female
TCGA-C8-A12U-01	BRCA	Tumor	3.466	II	<65	Female
TCGA-B6-A0WT-01	BRCA	Tumor	3.15546	II	<65	Female
TCGA-D8-A27M-01	BRCA	Tumor	4.50081	I	<65	Female
TCGA-A8-A081-01	BRCA	Tumor	3.81149	II	≥65	Female
TCGA-AO-A03O-01	BRCA	Tumor	4.19294	II	≥65	Female
TCGA-E2-A15L-01	BRCA	Tumor	3.43693	II	≥65	Female
TCGA-E2-A15H-01	BRCA	Tumor	3.39505	II	<65	Female
TCGA-A8-A093-01	BRCA	Tumor	3.66219	II	<65	Female
TCGA-BH-A18S-01	BRCA	Tumor	2.62297	I	≥65	Female
TCGA-AR-A1AO-01	BRCA	Tumor	4.0108	II	<65	Female
TCGA-AC-A23G-01	BRCA	Tumor	3.39369	II	≥65	Female
TCGA-AR-A24Z-01	BRCA	Tumor	4.00451	II	<65	Female
TCGA-D8-A145-01	BRCA	Tumor	4.1326	II	≥65	Female
TCGA-BH-A42V-01	BRCA	Tumor	3.5059	I	<65	Female
TCGA-D8-A1XB-01	BRCA	Tumor	3.24181	II	<65	Female
TCGA-A2-A0YL-01	BRCA	Tumor	3.06694	III	<65	Female
TCGA-A7-A5ZX-01	BRCA	Tumor	4.18821	III	<65	Female
TCGA-EW-A1P7-01	BRCA	Tumor	4.17952	II	<65	Female
TCGA-AR-A5QQ-01	BRCA	Tumor	3.83286	III	≥65	Female
TCGA-S3-AA15-01	BRCA	Tumor	3.89722	II	<65	Female
TCGA-AR-A24M-01	BRCA	Tumor	2.81353	III	<65	Female
TCGA-A2-A0EW-01	BRCA	Tumor	4.43025	III	<65	Female
TCGA-EW-A1J3-01	BRCA	Tumor	3.38817	I	<65	Female
TCGA-EW-A1P3-01	BRCA	Tumor	3.91645	II	<65	Female
TCGA-BH-A1FD-01	BRCA	Tumor	3.58738	I	≥65	Female
TCGA-EW-A424-01	BRCA	Tumor	4.17394	III	<65	Female
TCGA-E2-A2P5-01	BRCA	Tumor	3.46209	III	≥65	Female
TCGA-A2-A259-01	BRCA	Tumor	3.0858	I	≥65	Female
TCGA-E2-A1B1-01	BRCA	Tumor	4.0108	II	<65	Female
TCGA-A7-A3J0-01	BRCA	Tumor	3.23877	II	<65	Female
TCGA-AR-A2LR-01	BRCA	Tumor	4.80683	I	<65	Female
TCGA-A2-A0ES-01	BRCA	Tumor	3.1457	II	<65	Female
TCGA-EW-A1P8-01	BRCA	Tumor	4.34978	III	<65	Female
TCGA-AR-A0U4-01	BRCA	Tumor	4.04525	II	<65	Female
TCGA-A8-A08C-01	BRCA	Tumor	3.79079	II	≥65	Female
TCGA-LL-A7T0-01	BRCA	Tumor	4.24489	II	≥65	Female
TCGA-A7-A13D-01	BRCA	Tumor	1.64155	II	<65	Female
TCGA-EW-A1OZ-01	BRCA	Tumor	2.58495	II	<65	Female
TCGA-A2-A1FX-01	BRCA	Tumor	4.21952	III	<65	Female
TCGA-E2-A10F-01	BRCA	Tumor	4.00358	II	<65	Female
TCGA-A7-A4SD-01	BRCA	Tumor	4.47377	II	<65	Female
TCGA-E2-A1B5-01	BRCA	Tumor	3.67693	II	<65	Female
TCGA-BH-A0DE-01	BRCA	Tumor	3.83091	II	<65	Female
TCGA-AO-A0JM-01	BRCA	Tumor	4.31034	II	<65	Female
TCGA-E2-A14P-01	BRCA	Tumor	4.14156	III	≥65	Female
TCGA-E9-A227-01	BRCA	Tumor	3.48539	II	<65	Female
TCGA-AR-A2LH-01	BRCA	Tumor	4.1627	III	<65	Female
TCGA-A8-A07O-01	BRCA	Tumor	5.57799	II	<65	Female
TCGA-A2-A0D3-01	BRCA	Tumor	2.1635	I	<65	Female
TCGA-AO-A0JA-01	BRCA	Tumor	3.87382	III	<65	Female
TCGA-A2-A4S0-01	BRCA	Tumor	3.25703	II	≥65	Female
TCGA-B6-A0IE-01	BRCA	Tumor	3.84095	III	<65	Female
TCGA-OL-A66J-01	BRCA	Tumor	4.02055	I	≥65	Female
TCGA-D8-A1JI-01	BRCA	Tumor	2.64849	II	<65	Female
TCGA-OL-A5RX-01	BRCA	Tumor	3.91841	I	<65	Female
TCGA-EW-A1OY-01	BRCA	Tumor	4.02947	II	<65	Female
TCGA-AR-A5QM-01	BRCA	Tumor	3.88463	II	<65	Female
TCGA-A2-A0CQ-01	BRCA	Tumor	3.66338	I	<65	Female
TCGA-BH-A0BA-01	BRCA	Tumor	3.69261	III	<65	Female
TCGA-D8-A27F-01	BRCA	Tumor	5.31799	II	<65	Female
TCGA-C8-A26Z-01	BRCA	Tumor	3.51347	II	<65	Female
TCGA-E2-A14S-01	BRCA	Tumor	2.65303	I	≥65	Female
TCGA-A8-A06O-01	BRCA	Tumor	4.31328	I	<65	Female
TCGA-D8-A1JM-01	BRCA	Tumor	3.30746	II	<65	Female
TCGA-C8-A1HO-01	BRCA	Tumor	3.729	III	<65	Female
TCGA-E9-A228-01	BRCA	Tumor	4.5053	II	<65	Female
TCGA-E9-A1RA-01	BRCA	Tumor	4.56013	I	<65	Female
TCGA-V7-A7HQ-01	BRCA	Tumor	2.98552	III	≥65	Female
TCGA-OL-A6VR-01	BRCA	Tumor	3.96441	I	<65	Female
TCGA-AR-A1AW-01	BRCA	Tumor	3.39098	II	≥65	Female
TCGA-AR-A1AY-01	BRCA	Tumor	5.02322	I	≥65	Female
TCGA-BH-A0H6-01	BRCA	Tumor	3.48029	I	≥65	Female
TCGA-EW-A1OV-01	BRCA	Tumor	3.3277	II	<65	Female
TCGA-A2-A04U-01	BRCA	Tumor	2.96343	II	<65	Female
TCGA-D8-A1JF-01	BRCA	Tumor	2.35615	III	≥65	Female
TCGA-OL-A6VQ-01	BRCA	Tumor	3.58619	II	<65	Female
TCGA-C8-A273-01	BRCA	Tumor	3.96713	II	<65	Female
TCGA-C8-A132-01	BRCA	Tumor	3.32914	II	<65	Female
TCGA-BH-A0EE-01	BRCA	Tumor	6.4311	II	≥65	Female
TCGA-B6-A0RQ-01	BRCA	Tumor	2.57529	II	≥65	Female
TCGA-D8-A27W-01	BRCA	Tumor	3.35899	III	<65	Female
TCGA-AR-A2LJ-01	BRCA	Tumor	4.67918	III	<65	Female
TCGA-A8-A075-01	BRCA	Tumor	3.7071	II	<65	Female
TCGA-A1-A0SD-01	BRCA	Tumor	3.53603	II	<65	Female
TCGA-A2-A3Y0-01	BRCA	Tumor	2.65993	II	<65	Female
TCGA-EW-A6SD-01	BRCA	Tumor	2.4005	II	<65	Female
TCGA-E2-A14W-01	BRCA	Tumor	4.58139	II	≥65	Male
TCGA-LQ-A4E4-01	BRCA	Tumor	3.55825	III	≥65	Female
TCGA-AR-A256-01	BRCA	Tumor	3.84095	II	<65	Female
TCGA-A2-A0T3-01	BRCA	Tumor	4.16591	I	<65	Female
TCGA-BH-A0HN-01	BRCA	Tumor	2.54099	I	≥65	Female
TCGA-A7-A26G-01	BRCA	Tumor	3.68145	II	<65	Female
TCGA-AN-A0FV-01	BRCA	Tumor	2.87776	II	<65	Female
TCGA-A7-A0CD-01	BRCA	Tumor	3.09595	I	≥65	Female
TCGA-BH-A208-01	BRCA	Tumor	3.83891	II	<65	Female
TCGA-BH-A1F6-01	BRCA	Tumor	3.49186	NA	<65	Female
TCGA-AR-A1AU-01	BRCA	Tumor	4.07467	III	<65	Female
TCGA-AR-A24X-01	BRCA	Tumor	3.48284	II	<65	Female
TCGA-B6-A0IO-01	BRCA	Tumor	3.40872	II	≥65	Female
TCGA-E2-A1IE-01	BRCA	Tumor	3.99008	II	<65	Female
TCGA-AN-A0AJ-01	BRCA	Tumor	4.21024	II	≥65	Female
TCGA-AO-A128-01	BRCA	Tumor	3.88846	II	<65	Female
TCGA-AR-A24T-01	BRCA	Tumor	3.9458	III	<65	Female
TCGA-A2-A0CT-01	BRCA	Tumor	4.37708	II	≥65	Female
TCGA-BH-A1F2-01	BRCA	Tumor	4.36319	III	<65	Female
TCGA-D8-A1J9-01	BRCA	Tumor	3.00896	I	<65	Female
TCGA-E2-A150-01	BRCA	Tumor	3.68366	II	<65	Female
TCGA-AR-A251-01	BRCA	Tumor	4.58379	III	<65	Female
TCGA-BH-A0B1-01	BRCA	Tumor	3.82784	II	≥65	Female
TCGA-D8-A1JE-01	BRCA	Tumor	2.89722	II	<65	Female
TCGA-A2-A0CP-01	BRCA	Tumor	2.94862	I	<65	Female
TCGA-C8-A274-01	BRCA	Tumor	2.19217	II	<65	Female
TCGA-BH-A5IZ-01	BRCA	Tumor	5.88677	II	<65	Female
TCGA-A8-A076-01	BRCA	Tumor	3.74418	II	≥65	Female
TCGA-B6-A40B-01	BRCA	Tumor	3.13586	I	≥65	Female
TCGA-AR-A0U2-01	BRCA	Tumor	4.46727	III	<65	Female
TCGA-B6-A0IH-01	BRCA	Tumor	3.48676	III	≥65	Female
TCGA-D8-A27K-01	BRCA	Tumor	3.79598	II	<65	Female
TCGA-E9-A5FK-01	BRCA	Tumor	3.59453	III	<65	Female
TCGA-EW-A1PB-01	BRCA	Tumor	5.19772	III	≥65	Female
TCGA-BH-A0E9-01	BRCA	Tumor	3.53484	II	<65	Female
TCGA-A1-A0SE-01	BRCA	Tumor	4.35967	I	<65	Female
TCGA-E9-A1NH-01	BRCA	Tumor	3.16994	II	≥65	Female
TCGA-EW-A2FW-01	BRCA	Tumor	4.82429	II	<65	Female
TCGA-AO-A0JD-01	BRCA	Tumor	3.36594	III	<65	Female
TCGA-A7-A3IY-01	BRCA	Tumor	2.59696	I	≥65	Female
TCGA-AO-A0J8-01	BRCA	Tumor	2.79288	II	<65	Female
TCGA-A7-A3IZ-01	BRCA	Tumor	3.63108	II	<65	Female
TCGA-A2-A1G0-01	BRCA	Tumor	4.16431	II	<65	Female
TCGA-D8-A1XZ-01	BRCA	Tumor	3.34203	III	≥65	Female
TCGA-AR-A0TY-01	BRCA	Tumor	3.40465	II	<65	Female
TCGA-A2-A0SW-01	BRCA	Tumor	2.58978	IV	≥65	Female
TCGA-OL-A5DA-01	BRCA	Tumor	4.05483	II	<65	Female
TCGA-A7-A5ZV-01	BRCA	Tumor	4.87381	II	<65	Female
TCGA-LL-A50Y-01	BRCA	Tumor	3.58738	II	≥65	Female
TCGA-BH-A0BP-01	BRCA	Tumor	4.03651	I	≥65	Female
TCGA-AR-A1AK-01	BRCA	Tumor	3.79079	I	≥65	Female
TCGA-E9-A22G-01	BRCA	Tumor	5.8392	II	<65	Female
TCGA-AC-A2QH-01	BRCA	Tumor	2.125	II	<65	Female
TCGA-LL-A441-01	BRCA	Tumor	3.87084	I	<65	Female
TCGA-A8-A0A2-01	BRCA	Tumor	2.9982	II	≥65	Female
TCGA-E2-A576-01	BRCA	Tumor	3.78448	I	≥65	Female
TCGA-B6-A1KC-01	BRCA	Tumor	3.50718	II	≥65	Female
TCGA-OL-A66N-01	BRCA	Tumor	4.02412	III	<65	Female
TCGA-A2-A1FV-01	BRCA	Tumor	3.30449	II	≥65	Female
TCGA-C8-A1HM-01	BRCA	Tumor	4.37851	II	≥65	Female
TCGA-D8-A1JT-01	BRCA	Tumor	3.61115	II	≥65	Female
TCGA-A2-A04P-01	BRCA	Tumor	3.50335	III	<65	Female
TCGA-BH-A0GY-01	BRCA	Tumor	3.52232	II	≥65	Female
TCGA-E2-A56Z-01	BRCA	Tumor	4.61946	II	≥65	Female
TCGA-A7-A13E-01	BRCA	Tumor	2.87707	II	<65	Female
TCGA-E2-A1LS-01	BRCA	Tumor	1.15703	I	<65	Female
TCGA-A2-A0CX-01	BRCA	Tumor	1.87187	II	<65	Female
TCGA-A8-A07S-01	BRCA	Tumor	3.98549	II	≥65	Female
TCGA-BH-A1FM-01	BRCA	Tumor	3.43829	III	<65	Female
TCGA-A1-A0SM-01	BRCA	Tumor	3.77928	II	≥65	Male
TCGA-AQ-A04H-01	BRCA	Tumor	3.82989	III	<65	Female
TCGA-LL-A6FP-01	BRCA	Tumor	3.34771	II	≥65	Female
TCGA-A2-A0T5-01	BRCA	Tumor	2.9891	II	<65	Female
TCGA-A7-A4SF-01	BRCA	Tumor	3.88752	II	<65	Female
TCGA-A2-A25B-01	BRCA	Tumor	2.4725	II	<65	Female
TCGA-E2-A1IO-01	BRCA	Tumor	3.90973	I	<65	Female
TCGA-A2-A3XW-01	BRCA	Tumor	3.8022	II	<65	Female
TCGA-A1-A0SI-01	BRCA	Tumor	4.46861	II	<65	Female
TCGA-B6-A0RP-01	BRCA	Tumor	3.25855	NA	≥65	Female
TCGA-AQ-A04L-01	BRCA	Tumor	2.69824	II	<65	Female
TCGA-E2-A14N-01	BRCA	Tumor	3.30162	II	<65	Female
TCGA-AN-A049-01	BRCA	Tumor	4.26527	II	<65	Female
TCGA-A1-A0SB-01	BRCA	Tumor	2.61351	I	≥65	Female
TCGA-BH-A0GZ-01	BRCA	Tumor	2.71807	II	<65	Female
TCGA-BH-A0DP-01	BRCA	Tumor	3.09763	II	<65	Female
TCGA-AC-A2QI-01	BRCA	Tumor	3.16674	III	≥65	Female
TCGA-5L-AAT1-01	BRCA	Tumor	3.10771	IV	<65	Female
TCGA-A8-A06N-01	BRCA	Tumor	4.39232	III	≥65	Female
TCGA-BH-A8G0-01	BRCA	Tumor	3.70267	II	<65	Female
TCGA-A2-A0T6-01	BRCA	Tumor	3.59096	II	<65	Female
TCGA-AN-A0FF-01	BRCA	Tumor	5.1663	I	<65	Female
TCGA-E2-A15I-01	BRCA	Tumor	2.86593	II	<65	Female
TCGA-LL-A5YL-01	BRCA	Tumor	3.31762	II	<65	Female
TCGA-C8-A26X-01	BRCA	Tumor	3.21724	II	<65	Female
TCGA-AN-A0FD-01	BRCA	Tumor	2.51346	II	≥65	Female
TCGA-AN-A0AK-01	BRCA	Tumor	3.76557	II	≥65	Female
TCGA-D8-A1JS-01	BRCA	Tumor	2.09421	I	≥65	Female
TCGA-AO-A1KS-01	BRCA	Tumor	3.57656	II	≥65	Female
TCGA-AR-A24U-01	BRCA	Tumor	4.27427	II	<65	Female
TCGA-AR-A1AX-01	BRCA	Tumor	3.67131	I	<65	Female
TCGA-BH-A0C3-01	BRCA	Tumor	5.92817	I	<65	Female
TCGA-AC-A62Y-01	BRCA	Tumor	3.39098	II	≥65	Female
TCGA-D8-A1JD-01	BRCA	Tumor	4.27124	II	<65	Female
TCGA-S3-AA0Z-01	BRCA	Tumor	6.66289	II	<65	Female
TCGA-E9-A1N3-01	BRCA	Tumor	3.94673	III	≥65	Female
TCGA-A2-A0T2-01	BRCA	Tumor	3.38817	IV	≥65	Female
TCGA-BH-A0B5-01	BRCA	Tumor	3.97453	III	<65	Female
TCGA-LL-A9Q3-01	BRCA	Tumor	2.55094	III	≥65	Female
TCGA-BH-A18N-01	BRCA	Tumor	3.22189	II	≥65	Female
TCGA-D8-A27R-01	BRCA	Tumor	4.04703	III	<65	Female
TCGA-AO-A0J9-01	BRCA	Tumor	3.75806	III	<65	Female
TCGA-E9-A1N5-01	BRCA	Tumor	4.12685	II	<65	Female
TCGA-BH-A209-01	BRCA	Tumor	3.57895	I	≥65	Female
TCGA-E2-A1AZ-01	BRCA	Tumor	3.94019	II	<65	Female
TCGA-AN-A0FK-01	BRCA	Tumor	3.35195	III	≥65	Female
TCGA-A2-A0YI-01	BRCA	Tumor	3.51347	I	<65	Female
TCGA-D8-A1XO-01	BRCA	Tumor	3.31618	II	<65	Female
TCGA-D8-A27G-01	BRCA	Tumor	2.78244	II	≥65	Female
TCGA-AR-A0TT-01	BRCA	Tumor	3.04617	III	<65	Female
TCGA-A8-A0A4-01	BRCA	Tumor	4.21336	II	≥65	Female
TCGA-D8-A1X7-01	BRCA	Tumor	2.342	II	<65	Female
TCGA-AC-A3OD-01	BRCA	Tumor	2.09086	II	≥65	Female
TCGA-E2-A1LA-01	BRCA	Tumor	4.62934	II	<65	Female
TCGA-A8-A095-01	BRCA	Tumor	3.32194	I	<65	Female
TCGA-D8-A143-01	BRCA	Tumor	4.69158	II	<65	Female
TCGA-A2-A0YE-01	BRCA	Tumor	3.49314	II	<65	Female
TCGA-A2-A0D2-01	BRCA	Tumor	5.06909	II	<65	Female
TCGA-AC-A3YI-01	BRCA	Tumor	2.7698	III	≥65	Female
TCGA-A8-A07Z-01	BRCA	Tumor	4.27579	II	≥65	Female
TCGA-AN-A0FT-01	BRCA	Tumor	1.95237	II	<65	Female
TCGA-A2-A0YF-01	BRCA	Tumor	3.59215	I	≥65	Female
TCGA-BH-A0DS-01	BRCA	Tumor	3.99008	III	≥65	Female
TCGA-E9-A1R5-01	BRCA	Tumor	2.73981	I	<65	Female
TCGA-E9-A243-01	BRCA	Tumor	3.40872	II	<65	Female
TCGA-A2-A25D-01	BRCA	Tumor	3.3205	III	≥65	Female
TCGA-E2-A159-01	BRCA	Tumor	4.55764	II	<65	Female
TCGA-A8-A0A7-01	BRCA	Tumor	4.0108	II	<65	Female
TCGA-B6-A0X5-01	BRCA	Tumor	1.23264	II	<65	Female
TCGA-B6-A0RE-01	BRCA	Tumor	3.33482	NA	<65	Female
TCGA-A2-A0CY-01	BRCA	Tumor	0.495692	II	<65	Female
TCGA-JL-A3YX-01	BRCA	Tumor	3.50973	II	<65	Female
TCGA-AC-A3QP-01	BRCA	Tumor	3.39369	II	≥65	Female
TCGA-EW-A1PH-01	BRCA	Tumor	4.69043	II	<65	Female
TCGA-BH-A0DH-01	BRCA	Tumor	3.6229	II	<65	Female
TCGA-E9-A22H-01	BRCA	Tumor	4.38194	II	<65	Female
TCGA-D8-A3Z6-01	BRCA	Tumor	3.23573	III	<65	Female
TCGA-E2-A155-01	BRCA	Tumor	3.51101	II	<65	Female
TCGA-B6-A0X1-01	BRCA	Tumor	5.39331	NA	<65	Female
TCGA-PE-A5DE-01	BRCA	Tumor	3.4751	II	<65	Female
TCGA-A8-A07U-01	BRCA	Tumor	3.72133	III	≥65	Female
TCGA-A1-A0SP-01	BRCA	Tumor	3.43693	II	<65	Female
TCGA-S3-A6ZH-01	BRCA	Tumor	4.08493	III	<65	Female
TCGA-A2-A3XU-01	BRCA	Tumor	2.98185	II	<65	Female
TCGA-A1-A0SH-01	BRCA	Tumor	4.02947	II	<65	Female
TCGA-E2-A1LB-01	BRCA	Tumor	2.94862	II	<65	Female
TCGA-BH-A0AV-01	BRCA	Tumor	4.8324	I	<65	Female
TCGA-A2-A0D0-01	BRCA	Tumor	1.36735	II	<65	Female
TCGA-A8-A08S-01	BRCA	Tumor	3.74741	II	≥65	Female
TCGA-EW-A2FR-01	BRCA	Tumor	3.32482	III	<65	Female
TCGA-C8-A133-01	BRCA	Tumor	3.54105	III	≥65	Female
TCGA-A2-A3XY-01	BRCA	Tumor	4.33342	II	<65	Female
TCGA-EW-A3E8-01	BRCA	Tumor	4.4189	II	<65	Female
TCGA-A2-A0SU-01	BRCA	Tumor	3.843	II	≥65	Female
TCGA-C8-A1HE-01	BRCA	Tumor	2.37017	II	<65	Female
TCGA-B6-A0RM-01	BRCA	Tumor	4.14081	NA	<65	Female
TCGA-AQ-A0Y5-01	BRCA	Tumor	2.59454	III	≥65	Female
TCGA-5L-AAT0-01	BRCA	Tumor	3.05136	II	<65	Female
TCGA-AR-A1AI-01	BRCA	Tumor	2.33341	II	<65	Female
TCGA-D8-A3Z5-01	BRCA	Tumor	3.98455	III	<65	Female
TCGA-GM-A2DN-01	BRCA	Tumor	4.52481	II	<65	Female
TCGA-B6-A1KI-01	BRCA	Tumor	3.11938	I	<65	Female
TCGA-BH-A0BO-01	BRCA	Tumor	3.64957	I	<65	Female
TCGA-E2-A152-01	BRCA	Tumor	3.75593	I	<65	Female
TCGA-A8-A06T-01	BRCA	Tumor	3.96441	III	≥65	Female
TCGA-AC-A2FE-01	BRCA	Tumor	3.3089	III	<65	Female
TCGA-LL-A6FQ-01	BRCA	Tumor	2.73556	III	≥65	Female
TCGA-E9-A248-01	BRCA	Tumor	3.87084	II	<65	Female
TCGA-A7-A26I-01	BRCA	Tumor	2.64939	II	≥65	Female
TCGA-C8-A12Q-01	BRCA	Tumor	2.43562	III	≥65	Female
TCGA-BH-A0HU-01	BRCA	Tumor	5.71098	I	<65	Female
TCGA-AR-A24V-01	BRCA	Tumor	3.44628	II	<65	Female
TCGA-B6-A0WX-01	BRCA	Tumor	3.70156	III	<65	Female
TCGA-D8-A1Y2-01	BRCA	Tumor	3.27504	II	≥65	Female
TCGA-AN-A0AR-01	BRCA	Tumor	2.89332	II	<65	Female
TCGA-A8-A06P-01	BRCA	Tumor	3.5236	III	<65	Female
TCGA-AC-A62X-01	BRCA	Tumor	5.89601	II	≥65	Female
TCGA-AC-A2FO-01	BRCA	Tumor	4.48093	II	≥65	Female
TCGA-B6-A3ZX-01	BRCA	Tumor	4.67188	IV	<65	Female
TCGA-D8-A142-01	BRCA	Tumor	3.24486	II	≥65	Female
TCGA-LD-A9QF-01	BRCA	Tumor	3.81251	I	≥65	Female
TCGA-BH-A0DX-01	BRCA	Tumor	3.91076	I	<65	Female
TCGA-B6-A0RU-01	BRCA	Tumor	6.45453	I	<65	Female
TCGA-EW-A1J6-01	BRCA	Tumor	2.52354	I	≥65	Female
TCGA-E9-A22B-01	BRCA	Tumor	2.55335	I	≥65	Female
TCGA-E2-A106-01	BRCA	Tumor	2.65538	I	<65	Female
TCGA-A1-A0SF-01	BRCA	Tumor	4.12685	II	<65	Female
TCGA-OL-A5RV-01	BRCA	Tumor	2.79074	III	<65	Female
TCGA-E2-A1BC-01	BRCA	Tumor	4.54538	I	<65	Female
TCGA-BH-A0W7-01	BRCA	Tumor	4.71476	I	<65	Female
TCGA-E2-A15C-01	BRCA	Tumor	3.47638	I	<65	Female
TCGA-AR-A0U3-01	BRCA	Tumor	3.80629	II	<65	Female
TCGA-BH-A0HW-01	BRCA	Tumor	3.96254	I	<65	Female
TCGA-GM-A3NW-01	BRCA	Tumor	3.44492	II	<65	Female
TCGA-D8-A1XU-01	BRCA	Tumor	2.6713	I	<65	Female
TCGA-BH-A0B3-01	BRCA	Tumor	5.15221	II	<65	Female
TCGA-PL-A8LX-01	BRCA	Tumor	3.36314	IV	<65	Female
TCGA-B6-A0IN-01	BRCA	Tumor	3.44228	NA	<65	Female
TCGA-A2-A3KC-01	BRCA	Tumor	3.9588	II	<65	Female
TCGA-BH-A0HX-01	BRCA	Tumor	3.28096	II	<65	Female
TCGA-A8-A097-01	BRCA	Tumor	4.35472	II	≥65	Female
TCGA-E9-A22E-01	BRCA	Tumor	3.66449	III	<65	Female
TCGA-B6-A0IP-01	BRCA	Tumor	3.40872	I	≥65	Female
TCGA-A2-A04X-01	BRCA	Tumor	4.39984	II	<65	Female
TCGA-E2-A1IU-01	BRCA	Tumor	3.16514	I	<65	Female
TCGA-AC-A3BB-01	BRCA	Tumor	4.3455	III	<65	Female
TCGA-A8-A094-01	BRCA	Tumor	3.43429	II	≥65	Female
TCGA-C8-A12Z-01	BRCA	Tumor	3.0409	II	<65	Female
TCGA-D8-A1XF-01	BRCA	Tumor	3.37714	II	<65	Female
TCGA-A8-A082-01	BRCA	Tumor	4.47444	II	<65	Female
TCGA-AR-A1AL-01	BRCA	Tumor	3.58976	III	<65	Female
TCGA-3C-AALJ-01	BRCA	Tumor	3.11266	II	<65	Female
TCGA-LL-A440-01	BRCA	Tumor	3.8728	I	<65	Female
TCGA-AR-A2LK-01	BRCA	Tumor	4.20324	III	<65	Female
TCGA-A8-A07G-01	BRCA	Tumor	3.22189	II	≥65	Female
TCGA-AO-A12H-01	BRCA	Tumor	4.08578	II	≥65	Female
TCGA-BH-A0DI-01	BRCA	Tumor	3.50079	II	<65	Female
TCGA-BH-A0B7-01	BRCA	Tumor	4.32116	II	<65	Female
TCGA-A2-A0EX-01	BRCA	Tumor	3.48676	II	<65	Female
TCGA-D8-A1XR-01	BRCA	Tumor	3.93355	II	<65	Female
TCGA-AR-A0TQ-01	BRCA	Tumor	3.70046	III	<65	Female
TCGA-BH-A18P-01	BRCA	Tumor	4.52041	I	<65	Female
TCGA-E2-A15O-01	BRCA	Tumor	3.65187	I	≥65	Female
TCGA-AO-A12C-01	BRCA	Tumor	3.0409	II	<65	Female
TCGA-OL-A97C-01	BRCA	Tumor	4.48991	II	≥65	Female
TCGA-BH-A18G-01	BRCA	Tumor	3.22189	I	≥65	Female
TCGA-B6-A0IA-01	BRCA	Tumor	2.94296	II	<65	Female
TCGA-A8-A090-01	BRCA	Tumor	3.75806	II	≥65	Female
TCGA-5T-A9QA-01	BRCA	Tumor	1.275	II	<65	Female
TCGA-AN-A0XT-01	BRCA	Tumor	3.35754	III	<65	Female
TCGA-AO-A0J4-01	BRCA	Tumor	4.13666	I	<65	Female
TCGA-A2-A0YK-01	BRCA	Tumor	4.56377	II	<65	Female
TCGA-A8-A09K-01	BRCA	Tumor	3.52981	II	≥65	Female
TCGA-E2-A153-11	BRCA	Normal	3.27648	II	<65	Female
TCGA-BH-A0BQ-11	BRCA	Normal	4.40118	I	<65	Female
TCGA-BH-A204-11	BRCA	Normal	5.91961	II	≥65	Female
TCGA-E9-A1RF-11	BRCA	Normal	5.29606	III	≥65	Female
TCGA-A7-A13F-11	BRCA	Normal	5.54226	III	<65	Female
TCGA-AC-A23H-11	BRCA	Normal	4.72139	II	≥65	Female
TCGA-BH-A0HA-11	BRCA	Normal	3.45019	I	<65	Female
TCGA-A7-A0CE-11	BRCA	Normal	3.95515	II	<65	Female
TCGA-BH-A0HK-11	BRCA	Normal	4.36109	II	≥65	Female
TCGA-BH-A0B7-11	BRCA	Normal	4.28025	II	<65	Female
TCGA-E2-A158-11	BRCA	Normal	6.69904	II	<65	Female
TCGA-BH-A0DV-11	BRCA	Normal	3.3533	III	<65	Female
TCGA-BH-A1ET-11	BRCA	Normal	4.90638	I	<65	Female
TCGA-E9-A1ND-11	BRCA	Normal	5.05395	II	≥65	Female
TCGA-BH-A18M-11	BRCA	Normal	5.89847	III	<65	Female
TCGA-BH-A1EO-11	BRCA	Normal	5.50812	II	≥65	Female
TCGA-AC-A2FB-11	BRCA	Normal	5.36705	II	≥65	Female
TCGA-E9-A1RH-11	BRCA	Normal	6.92303	II	<65	Female
TCGA-BH-A0DP-11	BRCA	Normal	4.00808	II	<65	Female
TCGA-BH-A0H9-11	BRCA	Normal	6.70142	II	≥65	Female
TCGA-BH-A0C3-11	BRCA	Normal	4.53973	I	<65	Female
TCGA-BH-A1FU-11	BRCA	Normal	5.3023	I	<65	Female
TCGA-E9-A1N4-11	BRCA	Normal	3.61822	III	<65	Female
TCGA-BH-A18S-11	BRCA	Normal	4.95561	I	≥65	Female
TCGA-GI-A2C9-11	BRCA	Normal	4.57469	II	<65	Female
TCGA-E2-A1L7-11	BRCA	Normal	3.27352	III	<65	Female
TCGA-E9-A1NA-11	BRCA	Normal	5.03514	II	<65	Female
TCGA-BH-A0E0-11	BRCA	Normal	5.1048	III	<65	Female
TCGA-E9-A1R7-11	BRCA	Normal	5.33486	II	<65	Female
TCGA-BH-A1FD-11	BRCA	Normal	5.67097	I	≥65	Female
TCGA-BH-A0DD-11	BRCA	Normal	5.75759	II	<65	Male
TCGA-BH-A208-11	BRCA	Normal	4.94622	II	<65	Female
TCGA-BH-A0BA-11	BRCA	Normal	5.50714	III	<65	Female
TCGA-E9-A1N6-11	BRCA	Normal	4.95416	II	<65	Female
TCGA-BH-A1F6-11	BRCA	Normal	5.65078	NA	<65	Female
TCGA-A7-A0DB-11	BRCA	Normal	5.42993	II	<65	Female
TCGA-BH-A1F2-11	BRCA	Normal	7.16081	III	<65	Female
TCGA-E2-A15I-11	BRCA	Normal	6.9144	II	<65	Female
TCGA-A7-A13E-11	BRCA	Normal	6.2774	II	<65	Female
TCGA-E2-A1LS-11	BRCA	Normal	7.68283	I	<65	Female
TCGA-BH-A0BW-11	BRCA	Normal	3.92505	I	≥65	Female
TCGA-BH-A1EW-11	BRCA	Normal	4.97546	II	<65	Female
TCGA-BH-A0DH-11	BRCA	Normal	5.86937	II	<65	Female
TCGA-E9-A1RD-11	BRCA	Normal	5.15503	II	≥65	Female
TCGA-BH-A0B5-11	BRCA	Normal	8.13205	III	<65	Female
TCGA-BH-A18N-11	BRCA	Normal	5.2418	II	≥65	Female
TCGA-BH-A209-11	BRCA	Normal	5.26225	I	≥65	Female
TCGA-E2-A1LB-11	BRCA	Normal	3.76557	II	<65	Female
TCGA-AC-A2FM-11	BRCA	Normal	4.59155	II	≥65	Female
TCGA-E9-A1NF-11	BRCA	Normal	5.07209	II	<65	Female
TCGA-BH-A0AZ-11	BRCA	Normal	3.93448	III	<65	Female
TCGA-E2-A1BC-11	BRCA	Normal	6.66022	I	<65	Female
TCGA-BH-A0BZ-11	BRCA	Normal	4.87681	III	<65	Female
TCGA-E2-A1LH-11	BRCA	Normal	3.82069	I	<65	Female
TCGA-BH-A18P-11	BRCA	Normal	7.61557	I	<65	Female
TCGA-BH-A0B3-11	BRCA	Normal	5.47058	II	<65	Female
TCGA-E9-A1N9-11	BRCA	Normal	4.62761	II	<65	Female
TCGA-BH-A0BM-11	BRCA	Normal	4.13175	II	<65	Female
TCGA-BH-A0E1-11	BRCA	Normal	4.08663	II	<65	Female
TCGA-BH-A0BJ-11	BRCA	Normal	3.95234	II	<65	Female
TCGA-A7-A0CH-11	BRCA	Normal	4.73881	II	≥65	Female
TCGA-A7-A0DC-11	BRCA	Normal	5.76338	I	<65	Female
TCGA-BH-A203-11	BRCA	Normal	5.37125	II	≥65	Female
TCGA-BH-A18R-11	BRCA	Normal	6.07553	II	<65	Female
TCGA-BH-A1FJ-11	BRCA	Normal	4.42958	III	≥65	Female
TCGA-BH-A1FB-11	BRCA	Normal	4.52423	II	<65	Female
TCGA-BH-A0BS-11	BRCA	Normal	5.11354	III	<65	Female
TCGA-BH-A0DO-11	BRCA	Normal	4.3709	I	≥65	Female
TCGA-BH-A0DK-11	BRCA	Normal	2.87188	II	<65	Female
TCGA-BH-A1FN-11	BRCA	Normal	4.28983	II	<65	Female
TCGA-BH-A1FG-11	BRCA	Normal	4.38194	I	≥65	Female
TCGA-BH-A1F8-11	BRCA	Normal	5.05356	III	≥65	Female
TCGA-BH-A0BV-11	BRCA	Normal	4.41414	II	≥65	Female
TCGA-BH-A0AU-11	BRCA	Normal	4.09933	II	<65	Female
TCGA-A7-A13G-11	BRCA	Normal	7.30325	II	≥65	Female
TCGA-BH-A0H5-11	BRCA	Normal	4.54845	I	<65	Female
TCGA-BH-A1EV-11	BRCA	Normal	6.3003	III	<65	Female
TCGA-BH-A1FH-11	BRCA	Normal	5.19295	IV	<65	Female
TCGA-E9-A1RI-11	BRCA	Normal	5.98454	III	<65	Female
TCGA-A7-A0D9-11	BRCA	Normal	5.99734	II	<65	Female
TCGA-BH-A0B8-11	BRCA	Normal	7.22278	I	<65	Female
TCGA-E9-A1NG-11	BRCA	Normal	4.5317	II	<65	Female
TCGA-E9-A1RB-11	BRCA	Normal	5.84352	II	<65	Female
TCGA-BH-A18L-11	BRCA	Normal	5.88922	III	<65	Female
TCGA-BH-A1EU-11	BRCA	Normal	4.37784	I	≥65	Female
TCGA-BH-A0DZ-11	BRCA	Normal	3.79904	II	<65	Female
TCGA-E9-A1N5-11	BRCA	Normal	4.80635	II	<65	Female
TCGA-BH-A0DQ-11	BRCA	Normal	4.25626	II	<65	Female
TCGA-BH-A18U-11	BRCA	Normal	4.69821	III	≥65	Female
TCGA-E2-A15M-11	BRCA	Normal	4.7339	II	≥65	Female
TCGA-BH-A18Q-11	BRCA	Normal	5.60404	II	<65	Female
TCGA-AC-A2FF-11	BRCA	Normal	4.2304	II	<65	Female
TCGA-BH-A1FE-11	BRCA	Normal	4.68533	II	<65	Female
TCGA-BH-A18V-11	BRCA	Normal	4.67697	II	<65	Female
TCGA-BH-A0BT-11	BRCA	Normal	3.31034	II	<65	Female
TCGA-BH-A0C0-11	BRCA	Normal	4.17791	II	<65	Female
TCGA-BH-A0DT-11	BRCA	Normal	4.18273	II	<65	Female
TCGA-GI-A2C8-11	BRCA	Normal	2.60406	III	<65	Female
TCGA-BH-A0DL-11	BRCA	Normal	4.92833	II	<65	Female
TCGA-BH-A18J-11	BRCA	Normal	4.81455	IV	<65	Female
TCGA-BH-A1FR-11	BRCA	Normal	4.39365	III	≥65	Female
TCGA-BH-A0BC-11	BRCA	Normal	4.91982	III	<65	Female
TCGA-BH-A18K-11	BRCA	Normal	6.11997	I	<65	Female
TCGA-E2-A1IG-11	BRCA	Normal	6.16937	II	<65	Female
TCGA-BH-A0DG-11	BRCA	Normal	4.72524	II	<65	Female
TCGA-BH-A1FM-11	BRCA	Normal	5.94154	III	<65	Female
TCGA-BH-A1FC-11	BRCA	Normal	5.03824	II	≥65	Female
TCGA-BH-A0H7-11	BRCA	Normal	5.22769	III	≥65	Female
TCGA-BH-A0AY-11	BRCA	Normal	6.12884	II	<65	Female
TCGA-BH-A1F0-11	BRCA	Normal	5.25962	II	≥65	Female
TCGA-BH-A1EN-11	BRCA	Normal	6.55966	II	≥65	Female
TCGA-E9-A1RC-11	BRCA	Normal	6.63389	III	<65	Female
TCGA-E2-A15K-11	BRCA	Normal	4.52108	II	<65	Female
TCGA-EK-A2RE-01	CESC	Tumor	3.97453	NA	<65	Female
TCGA-IR-A3L7-01	CESC	Tumor	6.34948	NA	<65	Female
TCGA-Q1-A73Q-01	CESC	Tumor	5.93407	NA	<65	Female
TCGA-C5-A1MF-01	CESC	Tumor	3.8074	NA	<65	Female
TCGA-ZJ-A8QQ-01	CESC	Tumor	3.78448	NA	<65	Female
TCGA-EX-A3L1-01	CESC	Tumor	2.69156	NA	<65	Female
TCGA-JW-A5VI-01	CESC	Tumor	4.93307	NA	<65	Female
TCGA-EA-A1QT-01	CESC	Tumor	7.13489	NA	<65	Female
TCGA-UC-A7PG-01	CESC	Tumor	3.88165	NA	<65	Female
TCGA-EA-A97N-01	CESC	Tumor	6.06913	NA	<65	Female
TCGA-EA-A3QD-01	CESC	Tumor	4.33266	NA	<65	Female
TCGA-C5-A1ME-01	CESC	Tumor	5.15299	NA	<65	Female
TCGA-C5-A8YR-01	CESC	Tumor	4.33342	NA	<65	Female
TCGA-FU-A40J-01	CESC	Tumor	6.74916	NA	<65	Female
TCGA-VS-A9V5-01	CESC	Tumor	7.17153	NA	<65	Female
TCGA-MY-A913-01	CESC	Tumor	2.94862	NA	<65	Female
TCGA-VS-A8Q9-01	CESC	Tumor	4.96161	NA	≥65	Female
TCGA-DS-A0VL-01	CESC	Tumor	6.1809	NA	<65	Female
TCGA-VS-A9UU-01	CESC	Tumor	6.11229	NA	<65	Female
TCGA-ZJ-AAXN-01	CESC	Tumor	2.40869	NA	<65	Female
TCGA-VS-A9U6-01	CESC	Tumor	6.62646	NA	<65	Female
TCGA-C5-A2LX-01	CESC	Tumor	6.30139	NA	<65	Female
TCGA-C5-A1M8-01	CESC	Tumor	8.16623	NA	<65	Female
TCGA-C5-A7CJ-01	CESC	Tumor	5.47185	NA	<65	Female
TCGA-GH-A9DA-01	CESC	Tumor	3.0286	NA	<65	Female
TCGA-EA-A5O9-01	CESC	Tumor	6.46135	NA	<65	Female
TCGA-Q1-A73P-01	CESC	Tumor	6.51633	NA	<65	Female
TCGA-C5-A8XK-01	CESC	Tumor	5.31906	NA	<65	Female
TCGA-C5-A907-01	CESC	Tumor	3.07037	NA	<65	Female
TCGA-VS-A9UD-01	CESC	Tumor	6.51148	NA	≥65	Female
TCGA-C5-A7CM-01	CESC	Tumor	4.81252	NA	<65	Female
TCGA-VS-A9V2-01	CESC	Tumor	4.90154	NA	<65	Female
TCGA-VS-A94Y-01	CESC	Tumor	3.71366	NA	<65	Female
TCGA-C5-A8ZZ-01	CESC	Tumor	4.36528	NA	<65	Female
TCGA-VS-A9UJ-01	CESC	Tumor	3.53977	NA	<65	Female
TCGA-ZJ-AAXI-01	CESC	Tumor	5.28388	NA	≥65	Female
TCGA-Q1-A6DT-01	CESC	Tumor	3.51219	NA	<65	Female
TCGA-VS-A9UQ-01	CESC	Tumor	6.45601	NA	<65	Female
TCGA-VS-A8EG-01	CESC	Tumor	7.06084	NA	<65	Female
TCGA-EX-A69L-01	CESC	Tumor	5.92669	NA	<65	Female
TCGA-Q1-A73O-01	CESC	Tumor	4.04177	NA	<65	Female
TCGA-VS-A8QC-01	CESC	Tumor	7.06669	NA	<65	Female
TCGA-EA-A5ZE-01	CESC	Tumor	5.97136	NA	<65	Female
TCGA-ZJ-A8QO-01	CESC	Tumor	6.90518	NA	≥65	Female
TCGA-JX-A5QV-01	CESC	Tumor	4.65075	NA	<65	Female
TCGA-EK-A2GZ-01	CESC	Tumor	2.85998	NA	<65	Female
TCGA-EK-A2R9-01	CESC	Tumor	6.16868	NA	<65	Female
TCGA-IR-A3LL-01	CESC	Tumor	5.56223	NA	<65	Female
TCGA-C5-A1M5-01	CESC	Tumor	7.23818	NA	<65	Female
TCGA-C5-A7X8-01	CESC	Tumor	5.85325	NA	<65	Female
TCGA-EA-A3HS-01	CESC	Tumor	5.00131	NA	<65	Female
TCGA-IR-A3LH-01	CESC	Tumor	5.51066	NA	<65	Female
TCGA-C5-A1M9-01	CESC	Tumor	3.50207	NA	<65	Female
TCGA-DG-A2KJ-01	CESC	Tumor	2.95794	NA	<65	Female
TCGA-Q1-A5R3-01	CESC	Tumor	3.278	NA	<65	Female
TCGA-HG-A2PA-01	CESC	Tumor	6.12993	NA	<65	Female
TCGA-EA-A50E-01	CESC	Tumor	4.08154	NA	<65	Female
TCGA-EA-A556-01	CESC	Tumor	3.15546	NA	<65	Female
TCGA-VS-A9V3-01	CESC	Tumor	6.70072	NA	<65	Female
TCGA-VS-A9UH-01	CESC	Tumor	5.46403	NA	<65	Female
TCGA-JX-A3PZ-01	CESC	Tumor	3.5729	NA	<65	Female
TCGA-C5-A1MP-01	CESC	Tumor	5.27462	NA	<65	Female
TCGA-MU-A5YI-01	CESC	Tumor	5.77006	NA	<65	Female
TCGA-VS-A8QA-01	CESC	Tumor	7.41656	NA	<65	Female
TCGA-FU-A5XV-01	CESC	Tumor	4.71533	NA	<65	Female
TCGA-EX-A8YF-01	CESC	Tumor	3.77085	NA	<65	Female
TCGA-ZJ-A8QR-01	CESC	Tumor	5.49795	NA	<65	Female
TCGA-IR-A3LB-01	CESC	Tumor	4.77078	NA	<65	Female
TCGA-EK-A2PI-01	CESC	Tumor	6.77522	NA	<65	Female
TCGA-HM-A6W2-01	CESC	Tumor	3.29128	NA	<65	Female
TCGA-EK-A2IR-01	CESC	Tumor	3.9486	NA	<65	Female
TCGA-IR-A3LF-01	CESC	Tumor	6.59558	NA	<65	Female
TCGA-HM-A4S6-01	CESC	Tumor	5.78635	NA	<65	Female
TCGA-VS-A8QF-01	CESC	Tumor	4.14241	NA	<65	Female
TCGA-VS-AA62-01	CESC	Tumor	3.05831	NA	<65	Female
TCGA-C5-A7UE-01	CESC	Tumor	5.15056	NA	<65	Female
TCGA-DS-A5RQ-01	CESC	Tumor	4.81966	NA	≥65	Female
TCGA-BI-A20A-01	CESC	Tumor	7.34837	NA	<65	Female
TCGA-EA-A3HU-01	CESC	Tumor	6.11711	NA	<65	Female
TCGA-EK-A2RM-01	CESC	Tumor	5.22068	NA	<65	Female
TCGA-DG-A2KK-01	CESC	Tumor	7.0261	NA	<65	Female
TCGA-C5-A1MI-01	CESC	Tumor	4.66448	NA	<65	Female
TCGA-JW-A852-01	CESC	Tumor	5.33486	NA	<65	Female
TCGA-EK-A2RA-01	CESC	Tumor	6.86036	NA	≥65	Female
TCGA-EK-A2RB-01	CESC	Tumor	5.84696	NA	<65	Female
TCGA-C5-A1MJ-01	CESC	Tumor	5.72079	NA	<65	Female
TCGA-MY-A5BE-01	CESC	Tumor	6.60954	NA	<65	Female
TCGA-C5-A1BE-01	CESC	Tumor	6.13732	NA	<65	Female
TCGA-ZJ-AAXT-01	CESC	Tumor	4.9986	NA	<65	Female
TCGA-LP-A7HU-01	CESC	Tumor	4.43759	NA	<65	Female
TCGA-2W-A8YY-01	CESC	Tumor	2.77185	NA	<65	Female
TCGA-EA-A411-01	CESC	Tumor	5.99183	NA	<65	Female
TCGA-C5-A1MN-01	CESC	Tumor	3.50335	NA	<65	Female
TCGA-C5-A2M2-01	CESC	Tumor	6.44365	NA	<65	Female
TCGA-EK-A2PK-01	CESC	Tumor	3.77613	NA	<65	Female
TCGA-EA-A410-01	CESC	Tumor	2.92975	NA	<65	Female
TCGA-VS-A952-01	CESC	Tumor	7.07562	NA	≥65	Female
TCGA-EK-A2IP-01	CESC	Tumor	3.53603	NA	<65	Female
TCGA-EK-A2PG-01	CESC	Tumor	5.8392	NA	≥65	Female
TCGA-FU-A3YQ-01	CESC	Tumor	5.17992	NA	<65	Female
TCGA-DS-A1OB-01	CESC	Tumor	5.23421	NA	<65	Female
TCGA-VS-A959-01	CESC	Tumor	5.86298	NA	≥65	Female
TCGA-EK-A2R7-01	CESC	Tumor	5.73551	NA	<65	Female
TCGA-JW-A5VJ-01	CESC	Tumor	4.08832	NA	<65	Female
TCGA-C5-A7UH-01	CESC	Tumor	4.46928	NA	<65	Female
TCGA-MA-AA3Z-01	CESC	Tumor	5.95532	NA	<65	Female
TCGA-VS-A9UR-01	CESC	Tumor	7.27225	NA	<65	Female
TCGA-EK-A3GN-01	CESC	Tumor	4.2683	NA	<65	Female
TCGA-DS-A3LQ-01	CESC	Tumor	3.34203	NA	<65	Female
TCGA-ZJ-AAXU-01	CESC	Tumor	5.14609	NA	<65	Female
TCGA-VS-A9UY-01	CESC	Tumor	6.27859	NA	<65	Female
TCGA-ZJ-AAXA-01	CESC	Tumor	5.55274	NA	<65	Female
TCGA-EK-A2RO-01	CESC	Tumor	7.16508	NA	<65	Female
TCGA-DS-A0VM-01	CESC	Tumor	5.79647	NA	<65	Female
TCGA-EX-A1H5-01	CESC	Tumor	7.34112	NA	<65	Female
TCGA-FU-A3EO-01	CESC	Tumor	5.89335	NA	<65	Female
TCGA-EK-A2RK-01	CESC	Tumor	6.85134	NA	≥65	Female
TCGA-C5-A1BL-01	CESC	Tumor	6.26862	NA	<65	Female
TCGA-Q1-A73S-01	CESC	Tumor	4.08154	NA	<65	Female
TCGA-PN-A8MA-01	CESC	Tumor	5.58103	NA	<65	Female
TCGA-DS-A7WF-01	CESC	Tumor	6.32805	NA	<65	Female
TCGA-C5-A7X3-01	CESC	Tumor	3.19059	NA	≥65	Female
TCGA-HM-A3JK-01	CESC	Tumor	5.46139	NA	<65	Female
TCGA-ZJ-AAXJ-01	CESC	Tumor	3.92411	NA	<65	Female
TCGA-VS-A9V1-01	CESC	Tumor	4.0951	NA	<65	Female
TCGA-FU-A3HZ-01	CESC	Tumor	2.72681	NA	<65	Female
TCGA-EA-A78R-01	CESC	Tumor	6.13279	NA	<65	Female
TCGA-JW-A5VG-01	CESC	Tumor	4.64499	NA	<65	Female
TCGA-VS-A9UV-01	CESC	Tumor	6.29971	NA	≥65	Female
TCGA-C5-A8YT-01	CESC	Tumor	3.84496	NA	<65	Female
TCGA-ZX-AA5X-01	CESC	Tumor	5.20676	NA	<65	Female
TCGA-VS-A958-01	CESC	Tumor	5.33096	NA	<65	Female
TCGA-VS-A8EL-01	CESC	Tumor	4.73718	NA	<65	Female
TCGA-ZJ-AB0I-01	CESC	Tumor	5.46921	NA	<65	Female
TCGA-C5-A2LZ-01	CESC	Tumor	6.22845	NA	≥65	Female
TCGA-VS-A950-01	CESC	Tumor	3.42087	NA	<65	Female
TCGA-IR-A3LK-01	CESC	Tumor	5.71314	NA	≥65	Female
TCGA-DS-A1OC-01	CESC	Tumor	5.20316	NA	<65	Female
TCGA-C5-A3HE-01	CESC	Tumor	4.02769	NA	<65	Female
TCGA-MA-AA3W-01	CESC	Tumor	6.0845	NA	<65	Female
TCGA-VS-A9UL-01	CESC	Tumor	7.3436	NA	≥65	Female
TCGA-VS-A9UO-01	CESC	Tumor	5.91863	NA	<65	Female
TCGA-C5-A8XJ-01	CESC	Tumor	5.85973	NA	≥65	Female
TCGA-C5-A7CL-01	CESC	Tumor	5.01304	NA	<65	Female
TCGA-FU-A3NI-01	CESC	Tumor	6.02235	NA	<65	Female
TCGA-EA-A439-01	CESC	Tumor	7.22397	NA	<65	Female
TCGA-VS-A9V0-01	CESC	Tumor	5.81199	NA	<65	Female
TCGA-EK-A3GK-01	CESC	Tumor	5.21065	NA	<65	Female
TCGA-C5-A7CG-01	CESC	Tumor	6.37922	NA	<65	Female
TCGA-C5-A1BI-01	CESC	Tumor	5.63608	NA	<65	Female
TCGA-HM-A3JJ-01	CESC	Tumor	6.23269	NA	<65	Female
TCGA-C5-A7UI-01	CESC	Tumor	5.28914	NA	<65	Female
TCGA-ZJ-AAXD-01	CESC	Tumor	6.37734	NA	<65	Female
TCGA-EK-A2R8-01	CESC	Tumor	4.98824	NA	<65	Female
TCGA-VS-A9UP-01	CESC	Tumor	6.12204	NA	<65	Female
TCGA-C5-A1BF-01	CESC	Tumor	4.95609	NA	<65	Female
TCGA-EX-A69M-01	CESC	Tumor	2.38681	NA	<65	Female
TCGA-EA-A5ZD-01	CESC	Tumor	5.41479	NA	<65	Female
TCGA-JX-A3Q0-01	CESC	Tumor	6.05829	NA	<65	Female
TCGA-BI-A0VS-01	CESC	Tumor	2.96718	NA	<65	Female
TCGA-VS-A8EJ-01	CESC	Tumor	6.3484	NA	<65	Female
TCGA-DR-A0ZL-01	CESC	Tumor	4.98185	NA	<65	Female
TCGA-MA-AA41-01	CESC	Tumor	5.07258	NA	<65	Female
TCGA-EA-A3HQ-01	CESC	Tumor	6.457	NA	<65	Female
TCGA-LP-A5U2-01	CESC	Tumor	5.81483	NA	<65	Female
TCGA-EA-A43B-01	CESC	Tumor	5.24414	NA	<65	Female
TCGA-C5-A3HD-01	CESC	Tumor	3.79904	NA	<65	Female
TCGA-IR-A3LI-01	CESC	Tumor	6.28352	NA	<65	Female
TCGA-VS-A8EI-01	CESC	Tumor	4.94158	NA	<65	Female
TCGA-EA-A4BA-01	CESC	Tumor	1.51603	NA	<65	Female
TCGA-C5-A3HL-01	CESC	Tumor	6.38218	NA	≥65	Female
TCGA-EA-A3Y4-01	CESC	Tumor	3.18106	NA	<65	Female
TCGA-UC-A7PF-01	CESC	Tumor	6.72836	NA	<65	Female
TCGA-VS-A9UB-01	CESC	Tumor	4.72351	NA	<65	Female
TCGA-UC-A7PI-01	CESC	Tumor	5.64333	NA	<65	Female
TCGA-DG-A2KL-01	CESC	Tumor	6.38841	NA	<65	Female
TCGA-JW-AAVH-01	CESC	Tumor	6.24236	NA	<65	Female
TCGA-MY-A5BF-01	CESC	Tumor	6.50506	NA	≥65	Female
TCGA-Q1-A5R1-01	CESC	Tumor	6.2544	NA	<65	Female
TCGA-FU-A57G-01	CESC	Tumor	3.03211	NA	<65	Female
TCGA-C5-A1BQ-01	CESC	Tumor	5.50587	NA	≥65	Female
TCGA-EK-A2PL-01	CESC	Tumor	4.24944	NA	<65	Female
TCGA-Q1-A6DW-01	CESC	Tumor	6.25401	NA	<65	Female
TCGA-C5-A2M1-01	CESC	Tumor	4.24489	NA	<65	Female
TCGA-R2-A69V-01	CESC	Tumor	3.7071	NA	<65	Female
TCGA-EA-A5ZF-01	CESC	Tumor	6.52108	NA	<65	Female
TCGA-FU-A23L-01	CESC	Tumor	5.35827	NA	<65	Female
TCGA-DS-A1OA-01	CESC	Tumor	5.7517	NA	≥65	Female
TCGA-EK-A2H1-01	CESC	Tumor	4.40194	NA	<65	Female
TCGA-LP-A4AU-01	CESC	Tumor	2.92792	NA	<65	Female
TCGA-VS-A9U7-01	CESC	Tumor	7.06917	NA	<65	Female
TCGA-C5-A2LS-01	CESC	Tumor	6.14974	NA	<65	Female
TCGA-MA-AA3Y-01	CESC	Tumor	2.77817	NA	<65	Female
TCGA-DG-A2KM-01	CESC	Tumor	4.22112	NA	<65	Female
TCGA-C5-A3HF-01	CESC	Tumor	4.75807	NA	<65	Female
TCGA-C5-A2LT-01	CESC	Tumor	1.88359	NA	<65	Female
TCGA-C5-A1BK-01	CESC	Tumor	5.50147	NA	<65	Female
TCGA-UC-A7PD-01	CESC	Tumor	4.99909	NA	<65	Female
TCGA-MY-A5BD-01	CESC	Tumor	6.61132	NA	<65	Female
TCGA-VS-A9UZ-01	CESC	Tumor	6.63735	NA	<65	Female
TCGA-DS-A1OD-01	CESC	Tumor	5.10267	NA	<65	Female
TCGA-C5-A8XH-01	CESC	Tumor	6.36282	NA	<65	Female
TCGA-EK-A2RC-01	CESC	Tumor	6.63092	NA	<65	Female
TCGA-JX-A3Q8-01	CESC	Tumor	7.70084	NA	<65	Female
TCGA-JW-A5VL-01	CESC	Tumor	4.84147	NA	<65	Female
TCGA-DS-A7WI-01	CESC	Tumor	3.35195	NA	<65	Female
TCGA-VS-A953-01	CESC	Tumor	6.37675	NA	<65	Female
TCGA-EA-A44S-01	CESC	Tumor	5.96811	NA	<65	Female
TCGA-VS-A957-01	CESC	Tumor	6.82071	NA	<65	Female
TCGA-JW-A5VH-01	CESC	Tumor	2.76553	NA	<65	Female
TCGA-EA-A3HR-01	CESC	Tumor	5.81169	NA	<65	Female
TCGA-EA-A3QE-01	CESC	Tumor	4.16827	NA	<65	Female
TCGA-WL-A834-01	CESC	Tumor	4.29135	NA	<65	Female
TCGA-C5-A901-01	CESC	Tumor	5.78527	NA	<65	Female
TCGA-JW-A69B-01	CESC	Tumor	5.88627	NA	<65	Female
TCGA-FU-A3HY-01	CESC	Tumor	5.50108	NA	<65	Female
TCGA-C5-A1M6-01	CESC	Tumor	6.41232	NA	<65	Female
TCGA-VS-A9V4-01	CESC	Tumor	0.731174	NA	<65	Female
TCGA-VS-A8Q8-01	CESC	Tumor	5.01885	NA	<65	Female
TCGA-DS-A0VN-01	CESC	Tumor	4.10263	NA	<65	Female
TCGA-MU-A8JM-01	CESC	Tumor	4.56501	NA	<65	Female
TCGA-C5-A2LY-01	CESC	Tumor	6.10351	NA	<65	Female
TCGA-FU-A23K-01	CESC	Tumor	5.3854	NA	<65	Female
TCGA-EA-A6QX-01	CESC	Tumor	6.74143	NA	<65	Female
TCGA-C5-A7CH-01	CESC	Tumor	4.09594	NA	<65	Female
TCGA-EK-A2RN-01	CESC	Tumor	3.41008	NA	<65	Female
TCGA-EK-A2RJ-01	CESC	Tumor	3.60995	NA	<65	Female
TCGA-C5-A1BM-01	CESC	Tumor	5.86121	NA	≥65	Female
TCGA-Q1-A73R-01	CESC	Tumor	7.71965	NA	<65	Female
TCGA-DS-A7WH-01	CESC	Tumor	5.2566	NA	<65	Female
TCGA-ZJ-AAX4-01	CESC	Tumor	4.669	NA	≥65	Female
TCGA-C5-A7CK-01	CESC	Tumor	4.77502	NA	<65	Female
TCGA-VS-A8EK-01	CESC	Tumor	5.33271	NA	≥65	Female
TCGA-EA-A1QS-01	CESC	Tumor	6.68399	NA	<65	Female
TCGA-FU-A3WB-01	CESC	Tumor	7.61626	NA	<65	Female
TCGA-FU-A3TQ-01	CESC	Tumor	6.17213	NA	<65	Female
TCGA-C5-A8XI-01	CESC	Tumor	5.96899	NA	≥65	Female
TCGA-C5-A1BN-01	CESC	Tumor	4.81349	NA	<65	Female
TCGA-IR-A3LA-01	CESC	Tumor	4.00986	NA	<65	Female
TCGA-VS-A94X-01	CESC	Tumor	3.88463	NA	<65	Female
TCGA-MA-AA42-01	CESC	Tumor	6.65676	NA	≥65	Female
TCGA-C5-A8YQ-01	CESC	Tumor	2.71366	NA	≥65	Female
TCGA-ZJ-AB0H-01	CESC	Tumor	4.36804	NA	<65	Female
TCGA-C5-A7X5-01	CESC	Tumor	1.49568	NA	≥65	Female
TCGA-VS-A9U5-01	CESC	Tumor	5.07297	NA	<65	Female
TCGA-C5-A1M7-01	CESC	Tumor	5.33525	NA	<65	Female
TCGA-C5-A905-01	CESC	Tumor	3.58252	NA	<65	Female
TCGA-Q1-A5R2-01	CESC	Tumor	6.03209	NA	<65	Female
TCGA-EK-A3GJ-01	CESC	Tumor	5.20161	NA	<65	Female
TCGA-MU-A51Y-01	CESC	Tumor	6.17775	NA	<65	Female
TCGA-DG-A2KH-01	CESC	Tumor	6.29112	NA	<65	Female
TCGA-VS-A8EB-01	CESC	Tumor	2.83388	NA	<65	Female
TCGA-LP-A4AX-01	CESC	Tumor	4.10094	NA	<65	Female
TCGA-VS-A94Z-01	CESC	Tumor	6.18465	NA	<65	Female
TCGA-ZJ-AAXB-01	CESC	Tumor	4.1611	NA	<65	Female
TCGA-C5-A1MQ-01	CESC	Tumor	3.78763	NA	<65	Female
TCGA-EX-A1H6-01	CESC	Tumor	5.68842	NA	<65	Female
TCGA-ZJ-AAXF-01	CESC	Tumor	5.0622	NA	<65	Female
TCGA-VS-A9UM-01	CESC	Tumor	6.90994	NA	<65	Female
TCGA-VS-A8EH-01	CESC	Tumor	5.1185	NA	<65	Female
TCGA-BI-A0VR-01	CESC	Tumor	6.0913	NA	<65	Female
TCGA-EA-A5FO-01	CESC	Tumor	6.69429	NA	<65	Female
TCGA-DR-A0ZM-01	CESC	Tumor	4.1326	NA	<65	Female
TCGA-MA-AA43-01	CESC	Tumor	5.47605	NA	<65	Female
TCGA-C5-A7UC-01	CESC	Tumor	2.6848	NA	<65	Female
TCGA-C5-A7XC-01	CESC	Tumor	6.14176	NA	<65	Female
TCGA-VS-A8QH-01	CESC	Tumor	2.42764	NA	≥65	Female
TCGA-LP-A5U3-01	CESC	Tumor	6.42893	NA	<65	Female
TCGA-DS-A1O9-01	CESC	Tumor	6.19668	NA	≥65	Female
TCGA-EA-A3HT-01	CESC	Tumor	5.65911	NA	≥65	Female
TCGA-IR-A3LC-01	CESC	Tumor	5.97913	NA	<65	Female
TCGA-FU-A770-01	CESC	Tumor	6.49813	NA	<65	Female
TCGA-VS-A8EC-01	CESC	Tumor	4.46269	NA	<65	Female
TCGA-4J-AA1J-01	CESC	Tumor	5.79283	NA	<65	Female
TCGA-LP-A4AV-01	CESC	Tumor	4.4436	NA	<65	Female
TCGA-EK-A2RL-01	CESC	Tumor	7.20907	NA	<65	Female
TCGA-EK-A3GM-01	CESC	Tumor	2.64849	NA	≥65	Female
TCGA-VS-A9UC-01	CESC	Tumor	5.49727	NA	<65	Female
TCGA-FU-A2QG-01	CESC	Tumor	4.70927	NA	<65	Female
TCGA-EK-A2PM-01	CESC	Tumor	4.5904	NA	≥65	Female
TCGA-DS-A0VK-01	CESC	Tumor	5.78763	NA	<65	Female
TCGA-VS-A94W-01	CESC	Tumor	6.025	NA	<65	Female
TCGA-C5-A1MK-01	CESC	Tumor	5.54041	NA	≥65	Female
TCGA-C5-A1MH-01	CESC	Tumor	5.01217	NA	≥65	Female
TCGA-C5-A0TN-01	CESC	Tumor	4.87478	NA	<65	Female
TCGA-VS-A9UI-01	CESC	Tumor	6.23595	NA	≥65	Female
TCGA-FU-A3TX-01	CESC	Tumor	5.55117	NA	≥65	Female
TCGA-Q1-A6DV-01	CESC	Tumor	6.53789	NA	<65	Female
TCGA-C5-A1ML-01	CESC	Tumor	6.43496	NA	<65	Female
TCGA-VS-A8QM-01	CESC	Tumor	5.67303	NA	<65	Female
TCGA-RA-A741-01	CESC	Tumor	5.74768	NA	<65	Female
[truncated: 8,081 more rows]

## Sheet: Links for public datasets
Database	Dadaset	Link
Gene Expression Omnibus	GSE4824-GPL97	https://www.ncbi.nlm.nih.gov/geo/query/acc.cgi?acc=GSE4824
	GSE60052	https://www.ncbi.nlm.nih.gov/geo/query/acc.cgi?acc=GSE60052
	GSE83492	https://www.ncbi.nlm.nih.gov/geo/query/acc.cgi?acc=GSE83492
	GSE15240	https://www.ncbi.nlm.nih.gov/geo/query/acc.cgi?acc=GSE15240
	GSE43346	https://www.ncbi.nlm.nih.gov/geo/query/acc.cgi?acc=GSE43346
	GSE30219	https://www.ncbi.nlm.nih.gov/geo/query/acc.cgi?acc=GSE30219
	GSE18385	https://www.ncbi.nlm.nih.gov/geo/query/acc.cgi?acc=GSE18385
	GSE52237	https://www.ncbi.nlm.nih.gov/geo/query/acc.cgi?acc=GSE52237
	GSE66294	https://www.ncbi.nlm.nih.gov/geo/query/acc.cgi?acc=GSE66294
	GSE43079	https://www.ncbi.nlm.nih.gov/geo/query/acc.cgi?acc=GSE43079
	GSE47436	https://www.ncbi.nlm.nih.gov/geo/query/acc.cgi?acc=GSE47436
	GSE45626	https://www.ncbi.nlm.nih.gov/geo/query/acc.cgi?acc=GSE45626
	GSE18674	https://www.ncbi.nlm.nih.gov/geo/query/acc.cgi?acc=GSE18674
	GSE11784	https://www.ncbi.nlm.nih.gov/geo/query/acc.cgi?acc=GSE11784
	GSE7832	https://www.ncbi.nlm.nih.gov/geo/query/acc.cgi?acc=GSE7832
	GSE10006	https://www.ncbi.nlm.nih.gov/geo/query/acc.cgi?acc=GSE10006
	GSE8545	https://www.ncbi.nlm.nih.gov/geo/query/acc.cgi?acc=GSE8545
	GSE4824-GPL96	https://www.ncbi.nlm.nih.gov/geo/query/acc.cgi?acc=GSE4824
	GSE4127	https://www.ncbi.nlm.nih.gov/geo/query/acc.cgi?acc=GSE4127
	GSE6044	https://www.ncbi.nlm.nih.gov/geo/query/acc.cgi?acc=GSE6044
	GSE83227	https://www.ncbi.nlm.nih.gov/geo/query/acc.cgi?acc=GSE83227
	GSE108055	https://www.ncbi.nlm.nih.gov/geo/query/acc.cgi?acc=GSE108055
	GSE44447	https://www.ncbi.nlm.nih.gov/geo/query/acc.cgi?acc=GSE44447
	GSE40275	https://www.ncbi.nlm.nih.gov/geo/query/acc.cgi?acc=GSE40275
	GSE1037	https://www.ncbi.nlm.nih.gov/geo/query/acc.cgi?acc=GSE1037
	GSE11969	https://www.ncbi.nlm.nih.gov/geo/query/acc.cgi?acc=GSE11969
	GSE149507	https://www.ncbi.nlm.nih.gov/geo/query/acc.cgi?acc=GSE149507
	GSE32036	https://www.ncbi.nlm.nih.gov/geo/query/acc.cgi?acc=GSE32036
Depmap Portal	CCLE for SYNJ2	https://depmap.org/portal/download/
Xena database	Pan-cancer data for SYNJ2	http://xena.ucsc.edu/
Sanger Box (v3.0)	Pan-cancer analysis for SYNJ2	http://vip.sangerbox.com/
