# Supplementary material for: Clinical significance of cyclin-dependent kinase inhibitor 2C expression in cancers: from small cell lung carcinoma to pan-cancers
Source: BMC Pulm Med. 2022 Jun 24;22:246. doi: 10.1186/s12890-022-02036-5 (PMC9233395; doi:10.1186/s12890-022-02036-5)
Supplement: Supplementary file 4 — Additional file 4: All results of enrichment analyses of CDKN2C positively related Up-DEGs. [file 12890_2022_2036_MOESM4_ESM.xlsx]

## Sheet: Legend
Additional file 4. All results of enrichment analyses of CDKN2C positively related Up-DEGs.

## Sheet: CC
ID	Description	GeneRatio	BgRatio	p.adjust	geneID	Count
GO:0005874	Microtubule	37/389	423/19520	1.96831e-11	ASPM/CENPE/CENPJ/CKAP2/DCX/DYNLT1/EML5/FSD1/KIF11/KIF14/KIF15/KIF1A/KIF22/KIF23/KIF5C/KIFC1/KLC1/MAP1B/MAP2/MAPT/MDM1/NAV1/NEK2/PCNT/PRC1/PSRC1/RACGAP1/SARM1/STMN1/TIAM1/TTLL5/TTLL7/TUBA1A/TUBA1B/TUBB/TUBB3/TUBGCP3	37
GO:0043025	Neuronal cell body	38/389	474/19520	6.81152e-11	ADCYAP1/ARHGEF7/ASCL1/BACE1/CACNA1A/CDK5R1/CHRNA3/CNTNAP2/CRMP1/DDC/DNER/DYNLT1/ELAVL4/ENC1/ENO2/GDI1/HCN3/KCNB2/KIF1A/KIF5C/KLHL14/KLHL24/L1CAM/MAP1B/MAP2/MAPT/MAST1/NRXN1/RBM8A/RRM1/SEZ6/SH3GL2/SLC1A4/SNCAIP/STMN2/SYT11/TIAM1/TTLL7	38
GO:0000775	Chromosome, centromeric region	23/389	196/19520	1.31848e-09	BUB3/CDT1/CENPA/CENPE/CENPF/CENPI/CENPK/DSN1/HELLS/ITGB3BP/KIF22/NCAPD3/NDC80/NEK2/NUF2/RAD21/SMC4/SPC25/SS18L1/STAG2/TOP2A/TTK/ZWINT	23
GO:0005819	Spindle	29/389	381/19520	6.60743e-08	ASPM/CDC7/CENPE/CENPF/CKAP2/CKAP2L/CRMP1/DYNLT1/ECT2/ESPL1/FBXO5/KIF11/KIF14/KIF15/KIF22/KIF23/KIFC1/NEK2/NUSAP1/PRC1/PSRC1/RACGAP1/RAD21/STAG2/TACC3/TERF1/TOPBP1/TTK/TUBGCP3	29
GO:0150034	Distal axon	24/389	287/19520	1.98754e-07	ADCYAP1/ATCAY/AUTS2/CALB2/CDK5R1/CRMP1/DYNLT1/ELAVL4/GAD1/HCN3/KIF5C/KLC1/L1CAM/MAP1B/MAP2/MAPT/PTPRN2/SNAP25/STMN2/STMN3/SYT11/TBC1D24/TIAM1/TUBB3	24
GO:0098793	Presynapse	31/389	487/19520	6.13421e-07	ADCYAP1/AMPH/ATCAY/ATP2B3/BACE1/BSN/CADPS/CALB2/CDH2/CDK5R1/DDC/GAD1/GAD2/GRM2/HCN3/KIF1A/NLGN1/NLGN4X/NRXN1/PCLO/PTPRN2/RIMS2/SH3GL2/SNAP25/SNCAIP/STX1A/STXBP1/SYN1/SYT11/TBC1D24/TRIM9	31
GO:0030427	Site of polarized growth	17/389	184/19520	5.7608e-06	ATCAY/AUTS2/CDK5R1/CRMP1/DYNLT1/ELAVL4/KIF5C/KLC1/L1CAM/MAP1B/MAP2/MAPT/SNAP25/STMN2/STMN3/TIAM1/TUBB3	17
GO:0098992	Neuronal dense core vesicle	5/389	13/19520	9.24509e-05	CADPS/CHGA/KIF1A/SCG2/STXBP5L	5
GO:0098978	Glutamatergic synapse	20/389	308/19520	0.000103653	ADAM22/ADCY1/ATP2B3/BSN/CADPS/CBLN1/CLSTN2/ELAVL1/FYN/FZD9/HRAS/NLGN1/NLGN4X/PCLO/PIN1/SH3GL2/SNAP25/STX1A/STXBP1/TIAM1	20
GO:0098984	Neuron to neuron synapse	21/389	342/19520	0.000134733	ADAM22/ADCY1/ADD2/BAALC/BACE1/BSN/CDH2/CDK5R1/CHRNA3/CLSTN2/FYN/MAP1B/NLGN1/NLGN4X/PCLO/PSD3/SH3GL2/STX1A/SYN1/SYT11/TIAM1	21
GO:0014069	Postsynaptic density	19/389	313/19520	0.000377558	ADAM22/ADCY1/ADD2/BAALC/BSN/CDH2/CDK5R1/CHRNA3/CLSTN2/FYN/MAP1B/NLGN1/NLGN4X/PCLO/PSD3/STX1A/SYN1/SYT11/TIAM1	19
GO:0008021	Synaptic vesicle	14/389	197/19520	0.000685795	AMPH/BACE1/BSN/DDC/GAD2/KIF1A/PTPRN2/SH3GL2/SNAP25/SNCAIP/STX1A/SYN1/SYT11/TRIM9	14
GO:0060077	Inhibitory synapse	4/389	14/19520	0.00183198	GAD1/GAD2/NLGN4X/SYT11	4
GO:0030496	Midbody	13/389	193/19520	0.00185139	CENPE/CENPF/CRMP1/ECT2/GDI1/KIF14/KIF23/NEK2/PIN1/PRC1/PSRC1/RACGAP1/SAFB	13
GO:0097060	Synaptic membrane	19/389	368/19520	0.00209328	ADAM22/ADCY1/CALB2/CBLN1/CDH2/CHRNA3/CLSTN2/GAD2/GRM2/NLGN1/NLGN4X/NRXN1/RIMS2/SNAP25/SNCAIP/STX1A/STXBP1/SYT11/TIAM1	19
GO:0044306	Neuron projection terminus	10/389	130/19520	0.00315837	ADCYAP1/ATCAY/BSN/CALB2/GAD1/GCH1/HCN3/PTPRN2/SYT11/TBC1D24	10
GO:0060076	Excitatory synapse	6/389	46/19520	0.00315837	BSN/CALB2/CBLN1/NLGN1/NLGN4X/SYT11	6
GO:0098685	Schaffer collateral - CA1 synapse	7/389	67/19520	0.00383969	ADCY1/BSN/FYN/INA/SH3GL2/SYN1/SYT11	7
GO:0042575	DNA polymerase complex	4/389	20/19520	0.00581509	POLA1/POLE/POLE2/REV3L	4
GO:0005667	Transcription regulator complex	18/389	409/19520	0.0144964	ASCL1/BEX1/DEPDC1/E2F1/E2F7/E2F8/HES6/INSM1/MBD3/MNAT1/PARP1/RBBP8/SIX2/SIX3/SMAD4/SOX4/TFDP1/TLE2	18
GO:0000307	Cyclin-dependent protein kinase holoenzyme complex	5/389	43/19520	0.0147213	CCNA1/CCNE2/CDK2/CDKN2D/MNAT1	5
GO:0098831	Presynaptic active zone cytoplasmic component	3/389	13/19520	0.016909	BSN/PCLO/RIMS2	3
GO:0005635	Nuclear envelope	19/389	462/19520	0.0198577	AGPAT5/CENPF/DTL/GCH1/GNAZ/IPO9/LBR/LEMD3/LMNB1/LMNB2/NELL1/NRM/NRXN1/PARP1/POLA1/RRM1/STX1A/TMPO/TUBB	19
GO:0071565	NBAF complex	3/389	15/19520	0.0236984	ACTL6B/SMARCA4/SS18L1	3
GO:0019898	Extrinsic component of membrane	14/389	304/19520	0.0251676	CDH2/FYN/GNAZ/GNG4/KIF1A/OPA1/PIK3R3/RACGAP1/SARM1/SNAP25/SOCS4/SYK/SYN1/TIAM1	14
GO:0043195	Terminal bouton	5/389	52/19520	0.0277231	ADCYAP1/CALB2/PTPRN2/SYT11/TBC1D24	5
GO:0031234	Extrinsic component of cytoplasmic side of plasma membrane	7/389	100/19520	0.0285823	FYN/GNAZ/GNG4/RACGAP1/SNAP25/SYK/TIAM1	7
GO:0097440	Apical dendrite	3/389	18/19520	0.0348523	MAP1B/MAP2/SEZ6	3
GO:1904115	Axon cytoplasm	5/389	58/19520	0.0389053	AP3B2/KIF1A/KIF5C/MAPT/OPA1	5

## Sheet: BP
ID	Description	GeneRatio	BgRatio	p.adjust	geneID	Count
GO:0000819	Sister chromatid segregation	33/378	199/18862	2.15e-17	BUB3/CDT1/CENPE/CENPF/CENPK/DSN1/ESPL1/FBXO5/FEN1/KIF14/KIF22/KIF23/KIFC1/NCAPD3/NCAPG2/NDC80/NEK2/NUF2/NUSAP1/PHF13/POGZ/PRC1/PSRC1/PTTG1/RACGAP1/RAD21/SMC4/STAG2/TACC3/TOP2A/TTK/UBE2C/ZWINT	33
GO:0098813	Nuclear chromosome segregation	36/378	273/18862	2.05e-16	BUB3/CCNE2/CDT1/CENPE/CENPF/CENPK/DSN1/ECT2/ESPL1/FBXO5/FEN1/FMN2/KIF14/KIF22/KIF23/KIFC1/NCAPD3/NCAPG2/NDC80/NEK2/NUF2/NUSAP1/PHF13/POGZ/PRC1/PSRC1/PTTG1/RACGAP1/RAD21/SMC4/STAG2/TACC3/TOP2A/TTK/UBE2C/ZWINT	36
GO:0048285	Organelle fission	47/378	486/18862	2.05e-16	BUB3/CCNA1/CCNE2/CDC25C/CDT1/CENPE/CENPF/CENPK/CEP192/DSN1/ESPL1/FBXO43/FBXO5/FMN2/GDAP1/KIF11/KIF14/KIF22/KIF23/KIFC1/MAPT/MYBL1/NCAPD3/NCAPG2/NDC80/NEK2/NUF2/NUSAP1/OPA1/PHF13/PIN1/POGZ/PRC1/PSRC1/PTTG1/RACGAP1/RAD21/RAD54L/SMC4/SMPD3/STAG2/TACC3/TOP2A/TTK/UBE2C/UBE2S/ZWINT	47
GO:0007059	Chromosome segregation	37/378	337/18862	1.94e-14	BUB3/CCNE2/CDT1/CENPE/CENPF/CENPK/DSN1/ECT2/ESPL1/FBXO5/FEN1/FMN2/KIF14/KIF22/KIF23/KIFC1/NCAPD3/NCAPG2/NDC80/NEK2/NUF2/NUSAP1/PHF13/POGZ/PRC1/PSRC1/PTTG1/RACGAP1/RAD21/SMC4/SPC25/STAG2/TACC3/TOP2A/TTK/UBE2C/ZWINT	37
GO:0006260	DNA replication	33/378	280/18862	1.14e-13	BARD1/CCNE2/CDC7/CDK2/CDT1/CHAF1A/DHX9/DONSON/DTL/E2F7/E2F8/EXO1/FAM111B/FBXO5/FEN1/HRAS/LIG1/MCM2/METTL4/NASP/NFIB/POLA1/POLE/POLE2/RBBP8/REV3L/RFC4/RNASEH2A/RRM1/TERF1/THOC1/TIMELESS/TOPBP1	33
GO:0007051	Spindle organization	26/378	182/18862	1.61e-12	ASPM/CENPE/CENPJ/CEP192/ESPL1/FBXO5/FSD1/KIF11/KIF23/KIFC1/NDC80/NEK2/NUF2/PCNT/PRC1/PSRC1/RACGAP1/SPC25/STAG2/STIL/STMN1/TACC3/TRIM36/TTK/TUBB/TUBGCP3	26
GO:0033044	Regulation of chromosome organization	30/378	273/18862	1.32e-11	AUTS2/BUB3/CDT1/CENPE/CENPF/DNMT1/DNMT3B/ESPL1/FBXO5/FEN1/ISL1/KMT2A/MAPT/MCM2/MNAT1/NDC80/NEK2/PARP1/PAXIP1/PRKD1/PTTG1/RAD21/RPS6KA5/SMAD4/TACC3/TERF1/TOP2A/TTK/UBE2C/ZWINT	30
GO:0000082	G1/S transition of mitotic cell cycle	29/378	275/18862	9.44e-11	CCNA1/CCNE2/CDC25C/CDC7/CDK2/CDKN1B/CDKN2A/CDKN2C/CDKN2D/CDKN3/CDT1/E2F1/E2F7/E2F8/EZH2/FBXO5/KHDRBS1/KIF14/MCM2/MNAT1/NASP/NPAT/POLA1/POLE/POLE2/SOX4/TFDP1/TYMS/ZNF324	29
GO:0010948	Negative regulation of cell cycle process	33/378	359/18862	9.53e-11	BUB3/CCP110/CDC25C/CDC7/CDK2/CDKN1B/CDKN2A/CDKN2C/CDKN2D/CDT1/CENPF/DONSON/DTL/E2F1/E2F7/E2F8/ESPL1/EZH2/FBXO43/FBXO5/FZD9/MDM1/NDC80/NEK2/PTTG1/RAD21/RBBP8/SOX4/TERF1/TFDP1/TOPBP1/TTK/ZWINT	33
GO:0044843	Cell cycle G1/S phase transition	29/378	298/18862	5.21e-10	CCNA1/CCNE2/CDC25C/CDC7/CDK2/CDKN1B/CDKN2A/CDKN2C/CDKN2D/CDKN3/CDT1/E2F1/E2F7/E2F8/EZH2/FBXO5/KHDRBS1/KIF14/MCM2/MNAT1/NASP/NPAT/POLA1/POLE/POLE2/SOX4/TFDP1/TYMS/ZNF324	29
GO:0045787	Positive regulation of cell cycle	33/378	395/18862	9.67e-10	ASCL1/CDC25C/CDC7/CDK2/CDK5R1/CDKN1B/CDT1/CENPJ/DTL/E2F1/E2F7/E2F8/ECT2/ESPL1/EZH2/FBXO5/FEN1/FOXA1/FZD9/INSM1/KIF14/KIF23/MNAT1/NDC80/NUSAP1/PSRC1/RACGAP1/RAD21/SMPD3/SOX4/TFDP1/THOC1/UBE2C	33
GO:0010975	Regulation of neuron projection development	34/378	428/18862	1.74e-09	ADCYAP1/ARHGAP33/CAMK1D/CAMK2B/CBFA2T2/CDH2/CDK5R1/CHRNA3/CRMP1/DYNLT1/ENC1/EZH2/FYN/GDI1/KIAA0319/KIF1A/L1CAM/MAP1B/MAP2/MAPT/MARK1/NDRG4/NLGN1/OPA1/PRKD1/RELN/SARM1/SEZ6/SHOX2/SNAP25/SS18L1/STMN2/TIAM1/TOX	34
GO:0007269	Neurotransmitter secretion	20/378	155/18862	7.05e-09	ADCY1/BACE1/CADPS/CHRNA3/GAD1/GAD2/NAPB/NLGN1/NRXN1/PCLO/PTPRN2/RIMS2/SNAP25/SNCAIP/STX1A/STXBP1/STXBP5L/SYN1/SYT11/TRIM9	20
GO:0099643	Signal release from synapse	20/378	155/18862	7.05e-09	ADCY1/BACE1/CADPS/CHRNA3/GAD1/GAD2/NAPB/NLGN1/NRXN1/PCLO/PTPRN2/RIMS2/SNAP25/SNCAIP/STX1A/STXBP1/STXBP5L/SYN1/SYT11/TRIM9	20
GO:0099504	Synaptic vesicle cycle	21/378	177/18862	1.05e-08	ADCY1/AMPH/BACE1/BSN/CADPS/CDH2/CDK5R1/DDC/NAPB/NLGN1/NLGN4X/PCLO/RIMS2/SH3GL2/SNAP25/STX1A/STXBP1/STXBP5L/SYN1/SYT11/TRIM9	21
GO:0051383	Kinetochore organization	9/378	22/18862	2.72e-08	CDT1/CENPA/CENPE/CENPF/CENPK/NDC80/NUF2/POGZ/SMC4	9
GO:0050808	Synapse organization	30/378	412/18862	1.43e-07	ADD2/ARHGAP33/BSN/CACNB3/CAMK2B/CBLN1/CDH2/CDK5R1/CLSTN2/DNER/FYN/FZD9/INA/KIF1A/L1CAM/MAP1B/MAPT/NLGN1/NLGN4X/NRCAM/NRXN1/OPA1/PCLO/PIN1/RELN/SEZ6/SYN1/TIAM1/TUBA1A/TUBB	30
GO:0051321	Meiotic cell cycle	23/378	250/18862	1.46e-07	BUB3/CCNA1/CCNE2/CDC25C/CDK2/ESPL1/EXO1/FBXO43/FBXO5/FMN2/MYBL1/NCAPD3/NEK2/NUF2/PTTG1/RAD21/RAD54L/RBBP8/SMC4/STAG2/TOP2A/TTK/TUBGCP3	23
GO:0006836	Neurotransmitter transport	21/378	209/18862	1.51e-07	ADCY1/BACE1/CADPS/CHRNA3/DDC/GAD1/GAD2/NAPB/NLGN1/NRXN1/PCLO/PTPRN2/RIMS2/SNAP25/SNCAIP/STX1A/STXBP1/STXBP5L/SYN1/SYT11/TRIM9	21
GO:0001505	Regulation of neurotransmitter levels	21/378	211/18862	1.75e-07	ABAT/ADCY1/BACE1/CADPS/CHRNA3/GAD1/GAD2/NAPB/NLGN1/NRXN1/PCLO/PTPRN2/RIMS2/SNAP25/SNCAIP/STX1A/STXBP1/STXBP5L/SYN1/SYT11/TRIM9	21
GO:0050804	Modulation of chemical synaptic transmission	29/378	405/18862	3.21e-07	ADCY1/ADCYAP1/BACE1/CACNA1A/CACNB3/CALB2/CAMK2B/CBLN1/CDH2/CHRNA3/CLSTN2/FYN/GRM2/GRM8/HRAS/MAP1B/MAPT/NLGN1/NLGN4X/NRXN1/RELN/RIMS2/SNAP25/SNCAIP/STX1A/STXBP1/STXBP5L/SYN1/SYT11	29
GO:0007088	Regulation of mitotic nuclear division	15/378	109/18862	4.04e-07	BUB3/CDC25C/CDT1/CENPF/ESPL1/FBXO43/FBXO5/NDC80/NEK2/NUSAP1/PIN1/RAD21/SMPD3/TTK/ZWINT	15
GO:0031346	Positive regulation of cell projection organization	26/378	344/18862	6e-07	ADCYAP1/ARHGEF7/AUTS2/CAMK1D/CAMK2B/CBFA2T2/CCP110/DYNLT1/ENC1/EZH2/FYN/GDI1/HRAS/L1CAM/MAP1B/MAPT/NDRG4/NLGN1/OPA1/PRKD1/RELN/SHOX2/SS18L1/STMN2/TIAM1/TOX	26
GO:0071103	DNA conformation change	26/378	352/18862	9.25e-07	ASF1B/CDKN2A/CENPA/CENPI/CENPK/CHAF1A/CHD7/DHX9/DNMT1/HELLS/HMGB2/HMGB3/ITGB3BP/MBD3/MCM2/MNAT1/NASP/NCAPD3/NCAPG2/NUSAP1/PARP1/PHF13/RAD54L/RFC4/SMC4/TOP2A	26
GO:0000083	Regulation of transcription involved in G1/S transition of mitotic cell cycle	9/378	35/18862	1.53e-06	CCNA1/CDT1/E2F1/E2F7/FBXO5/NPAT/POLA1/TFDP1/TYMS	9
GO:0051983	Regulation of chromosome segregation	13/378	89/18862	1.7e-06	BUB3/CDT1/CENPE/CENPF/ESPL1/FBXO5/NDC80/PTTG1/RAD21/TACC3/TTK/UBE2C/ZWINT	13
GO:0051960	Regulation of nervous system development	28/378	422/18862	2.33e-06	ADCYAP1/ASCL1/CAMK2B/CBLN1/CDK5R1/CHD7/CLSTN2/DLL3/DYNLT1/E2F1/EZH2/GDI1/HES6/HMGB2/KIAA0319/KIF14/L1CAM/MAP1B/MAP2/MAPT/NLGN1/NRXN1/OPA1/RELN/SHOX2/SOX11/SS18L1/TIAM1	28
GO:0044839	Cell cycle G2/M phase transition	22/378	276/18862	2.88e-06	CCP110/CDC25C/CDC7/CDK2/CENPF/CENPJ/CEP192/DONSON/DTL/FBXO5/KHDRBS1/KIF14/MELK/MNAT1/NEK2/PAXIP1/PCNT/PKIA/RAD21/TOPBP1/TUBA1A/TUBB	22
GO:0000086	G2/M transition of mitotic cell cycle	21/378	258/18862	4.02e-06	CCP110/CDC25C/CDC7/CDK2/CENPF/CENPJ/CEP192/DONSON/DTL/FBXO5/KHDRBS1/KIF14/MELK/MNAT1/NEK2/PCNT/PKIA/RAD21/TOPBP1/TUBA1A/TUBB	21
GO:0000910	Cytokinesis	17/378	171/18862	4.13e-06	CCP110/CENPA/CKAP2/E2F7/E2F8/ECT2/ESPL1/FMN2/FSD1/KIF14/KIF23/NUSAP1/PIN1/PRC1/RACGAP1/STMN1/TRIM36	17
GO:0051656	Establishment of organelle localization	27/378	431/18862	1.02e-05	AP3B2/CDT1/CENPA/CENPE/CENPF/CHGA/DYNLT1/ESPL1/FMN2/KIF14/KIF1A/KIF22/KIF5C/KIFC1/MAP1B/MAP2/MAPT/MARK1/NDC80/NLGN1/NUF2/NUSAP1/OPA1/PSRC1/STXBP1/SYK/SYT11	27
GO:0090329	Regulation of DNA-dependent DNA replication	9/378	47/18862	1.68e-05	CDC7/CDT1/DONSON/E2F7/E2F8/FBXO5/METTL4/RFC4/TIMELESS	9
GO:0046785	Microtubule polymerization	11/378	77/18862	1.84e-05	CDK5R1/CENPJ/CEP192/FBXO5/MAP1B/MAP2/MAPT/PSRC1/STMN1/STMN2/TUBGCP3	11
GO:0050767	Regulation of neurogenesis	23/378	348/18862	2.92e-05	ADCYAP1/ASCL1/CAMK2B/CDK5R1/CHD7/DLL3/DYNLT1/E2F1/EZH2/GDI1/HES6/HMGB2/KIAA0319/L1CAM/MAP1B/MAP2/MAPT/OPA1/RELN/SHOX2/SOX11/SS18L1/TIAM1	23
GO:0051571	Positive regulation of histone H3-K4 methylation	6/378	18/18862	4.24e-05	AUTS2/DNMT1/DNMT3B/KMT2A/PAXIP1/SMAD4	6
GO:0030900	Forebrain development	23/378	357/18862	4.32e-05	ADCYAP1/APLP1/ASCL1/BTBD3/CDH2/CDK5R1/CHD7/CNTNAP2/DLX5/E2F1/EZH2/FYN/ISL1/KIF14/KIF1A/NFIB/PGAP1/RELN/RRM1/SIX3/STIL/TACC3/TOX	23
GO:0099175	Regulation of postsynapse organization	11/378	87/18862	5.5e-05	ARHGAP33/CAMK2B/CBLN1/CDH2/CDK5R1/FYN/KIF1A/NLGN1/OPA1/RELN/TIAM1	11
GO:0001764	Neuron migration	14/378	145/18862	5.63e-05	ASCL1/AUTS2/CAMK2B/CDK5R1/CELSR2/DCX/DNER/FYN/KIAA0319/MAP1B/MARK1/NAV1/NRCAM/RELN	14
GO:0034508	Centromere complex assembly	9/378	56/18862	6.41e-05	CENPA/CENPE/CENPF/CENPI/CENPK/HELLS/ITGB3BP/NASP/POGZ	9
GO:0098815	Modulation of excitatory postsynaptic potential	8/378	44/18862	9.05e-05	CACNB3/CBLN1/NLGN1/NLGN4X/NRXN1/RELN/RIMS2/STX1A	8
GO:0035418	Protein localization to synapse	10/378	80/18862	0.000162363	ADAM22/BSN/DLG3/HRAS/KIF5C/MAPT/NLGN1/NRXN1/PCLO/SNAP25	10
GO:0051588	Regulation of neurotransmitter transport	11/378	99/18862	0.000172744	ADCY1/BACE1/CHRNA3/NLGN1/RIMS2/SNCAIP/STX1A/STXBP1/STXBP5L/SYN1/SYT11	11
GO:0050000	Chromosome localization	10/378	81/18862	0.000175751	CDT1/CENPE/CENPF/FMN2/KIF14/KIF22/KIFC1/NDC80/NUF2/PSRC1	10
GO:0000079	Regulation of cyclin-dependent protein serine/threonine kinase activity	11/378	101/18862	0.000198606	CCNA1/CCNE2/CDC25C/CDK5R1/CDKN1B/CDKN2A/CDKN2C/CDKN2D/CDKN3/MNAT1/PSRC1	11
GO:0060284	Regulation of cell development	26/378	485/18862	0.000200237	ADCYAP1/ARHGEF7/ASCL1/CAMK2B/CDK5R1/CHD7/DLL3/DYNLT1/E2F1/EZH2/GDI1/HES6/HMGB2/KIAA0319/KIF14/L1CAM/MAP1B/MAP2/MAPT/OPA1/RELN/SHOX2/SMAD4/SOX11/SS18L1/TIAM1	26
GO:0072331	Signal transduction by p53 class mediator	18/378	263/18862	0.000218879	BARD1/CDC25C/CDK2/CDK5R1/CDKN1B/E2F1/E2F7/E2F8/EXO1/MBD3/PAXIP1/PIN1/PMAIP1/RBBP8/RFC4/SOX4/TFDP1/TOPBP1	18
GO:0032465	Regulation of cytokinesis	10/378	90/18862	0.000397228	CCP110/E2F7/E2F8/ECT2/FSD1/KIF14/KIF23/PIN1/PRC1/RACGAP1	10
GO:0035249	Synaptic transmission, glutamatergic	10/378	90/18862	0.000397228	ADCYAP1/CDH2/GRM2/GRM8/NAPB/NLGN1/NRXN1/RELN/SLC1A4/STXBP1	10
GO:0032201	Telomere maintenance via semi-conservative replication	6/378	27/18862	0.000397228	FEN1/POLA1/POLE/POLE2/RFC4/TERF1	6
GO:0071824	Protein-DNA complex subunit organization	18/378	281/18862	0.000472399	ASF1B/CDT1/CENPA/CENPE/CENPF/CENPI/CENPK/CHAF1A/HELLS/HMGB2/ITGB3BP/MCM2/MNAT1/NASP/PARP1/POGZ/SMARCA4/TERF1	18
GO:0061351	Neural precursor cell proliferation	12/378	138/18862	0.000617049	ADCYAP1/ASCL1/CDH2/FZD9/INSM1/KIF14/KIF1A/MELK/RACGAP1/RRM1/SIX3/TOX	12
GO:0050803	Regulation of synapse structure or activity	15/378	214/18862	0.000768145	ARHGAP33/CAMK2B/CBLN1/CDH2/CDK5R1/CLSTN2/FYN/KIF1A/NLGN1/NRXN1/OPA1/RELN/TIAM1/TUBA1A/TUBB	15
GO:0045664	Regulation of neuron differentiation	14/378	190/18862	0.000804493	ASCL1/CDK5R1/DNMT3B/DTX1/ECT2/FOXA1/ISL1/MAP1B/NLGN1/NRCAM/OPA1/SIX3/SOX11/TIAM1	14
GO:0021700	Developmental maturation	17/378	268/18862	0.000810457	ACTL6B/ASCL1/CAMK2B/CDK5R1/CNTNAP2/FBXO5/FOXA1/KIF14/MAP1B/NRCAM/NRXN1/OPA1/RELN/SEZ6/SIX3/STXBP1/TYMS	17
GO:0060563	Neuroepithelial cell differentiation	5/378	20/18862	0.000946742	ASCL1/CDH2/INSM1/SOX11/SOX4	5
GO:0017157	Regulation of exocytosis	14/378	197/18862	0.00109884	ADCY1/BACE1/CADPS/NLGN1/PCLO/RIMS2/SMPD3/STX1A/STXBP1/STXBP5L/SYK/SYN1/SYT11/TRIM9	14
GO:0097104	Postsynaptic membrane assembly	4/378	11/18862	0.00111449	CDH2/NLGN1/NLGN4X/NRXN1	4
GO:2000758	Positive regulation of peptidyl-lysine acetylation	6/378	34/18862	0.00120581	AUTS2/ISL1/PAXIP1/RPS6KA5/SMAD4/SOX4	6
GO:0031113	Regulation of microtubule polymerization	7/378	50/18862	0.00131972	CDK5R1/MAP1B/MAP2/MAPT/PSRC1/STMN1/STMN2	7
GO:0042063	Gliogenesis	17/378	283/18862	0.00138314	ADAM22/ADCYAP1/ASCL1/CDH2/CDK5R1/CDKN2C/DNER/DTX1/E2F1/EZH2/MAPT/MMP24/NFIB/RELN/SOX11/SOX4/TIAM1	17
GO:0016049	Cell growth	23/378	470/18862	0.00179663	AUTS2/CDK5R1/CDKN1B/CDKN2A/CDKN2C/CDKN2D/GDI1/GNG4/KIAA0319/KIF14/L1CAM/MAP1B/MAP2/MAPT/NRCAM/PIN1/PSRC1/RIMS2/SH3BP4/SH3GL2/SMAD4/SMARCA4/TIAM1	23
GO:0051653	Spindle localization	7/378	53/18862	0.00180467	ASPM/CENPA/DYNLT1/ESPL1/FMN2/NDC80/NUSAP1	7
GO:0106027	Neuron projection organization	9/378	91/18862	0.001832	ARHGAP33/CAMK2B/CDK5R1/FYN/KIF1A/NLGN1/OPA1/RELN/TIAM1	9
GO:0060078	Regulation of postsynaptic membrane potential	11/378	136/18862	0.00195312	ADCYAP1/CACNB3/CBLN1/CHRNA3/NLGN1/NLGN4X/NRXN1/RELN/RIMS2/SEZ6/STX1A	11
GO:0097479	Synaptic vesicle localization	7/378	54/18862	0.00199362	AP3B2/CDH2/KIF5C/MAP2/NLGN1/PCLO/SYN1	7
GO:0070507	Regulation of microtubule cytoskeleton organization	11/378	137/18862	0.00203043	CDK5R1/FSD1/MAP1B/MAP2/MAPT/PSRC1/STMN1/STMN2/STMN3/TACC3/TRIM36	11
GO:0071459	Protein localization to chromosome, centromeric region	5/378	25/18862	0.00239399	BUB3/CDT1/CENPA/NDC80/TTK	5
GO:0006310	DNA recombination	17/378	299/18862	0.00239399	CDC7/EXO1/FEN1/HMGB2/HMGB3/MCM2/PARP1/PAXIP1/PGBD5/RAD21/RAD54L/RBBP8/REV3L/THOC1/TIMELESS/TOP2A/UNG	17
GO:0006333	Chromatin assembly or disassembly	14/378	221/18862	0.00300562	ASF1B/CDKN2A/CENPA/CENPI/CENPK/CHAF1A/DNMT1/HELLS/HMGB2/ITGB3BP/MBD3/MCM2/NASP/SMARCA4	14
GO:0031497	Chromatin assembly	13/378	196/18862	0.00315846	ASF1B/CDKN2A/CENPA/CENPI/CENPK/CHAF1A/DNMT1/HELLS/HMGB2/ITGB3BP/MBD3/MCM2/NASP	13
GO:0043523	Regulation of neuron apoptotic process	13/378	197/18862	0.00330528	ASCL1/BACE1/CDK5R1/CITED1/FYN/FZD9/HRAS/ISL1/KIF14/PARP1/PIN1/STXBP1/TOX3	13
GO:0007018	Microtubule-based movement	19/378	370/18862	0.00335084	AP3B2/CELSR2/CENPE/FMN2/IFT81/KIF11/KIF14/KIF15/KIF1A/KIF22/KIF23/KIF5C/KIFC1/KLC1/MAP1B/MAP2/MAPT/OPA1/RACGAP1	19
GO:0140056	Organelle localization by membrane tethering	12/378	172/18862	0.00339485	AHI1/CCP110/CENPJ/CEP192/NDRG4/NEK2/PCNT/SNAP25/STX1A/STXBP1/TUBA1A/TUBB	12
GO:0009914	Hormone transport	17/378	312/18862	0.00357896	ADCYAP1/CACNA1A/CHD7/CHGA/GRP/ISL1/PCLO/PTPRN2/RIMS2/SMAD4/SMPD3/SNAP25/SOX11/SOX4/STX1A/STXBP5L/TIAM1	17
GO:0070997	Neuron death	18/378	342/18862	0.00357896	ASCL1/BACE1/CDK5R1/CHGA/CITED1/DPYSL4/FYN/FZD9/HRAS/ISL1/KIF14/MAPT/PARP1/PIN1/SARM1/STXBP1/TBC1D24/TOX3	18
GO:0032886	Regulation of microtubule-based process	14/378	227/18862	0.00366067	CDK5R1/CENPJ/FSD1/MAP1B/MAP2/MAPT/MDM1/PSRC1/STIL/STMN1/STMN2/STMN3/TACC3/TRIM36	14
GO:0001558	Regulation of cell growth	20/378	406/18862	0.00382821	CDK5R1/CDKN1B/CDKN2A/CDKN2C/CDKN2D/GDI1/GNG4/KIAA0319/KIF14/L1CAM/MAP1B/MAP2/MAPT/NRCAM/PIN1/PSRC1/RIMS2/SH3BP4/SMAD4/SMARCA4	20
GO:0032386	Regulation of intracellular transport	18/378	350/18862	0.00450959	BARD1/CACNB3/CDK5R1/DHX9/E2F1/ECT2/FYN/GDI1/HRAS/KHDRBS1/MAP1B/MAP2/NDRG4/PCNT/PGAP1/PKIA/PMAIP1/TFDP1	18
GO:0043254	Regulation of protein-containing complex assembly	21/378	446/18862	0.00474093	ADD2/CDK5R1/CDT1/CYFIP2/INSM1/ISL1/JAM3/KIF14/MAP1B/MAP2/MAPT/NAPB/PARP1/PSRC1/STMN1/STMN2/STX1A/STXBP1/SYK/TERF1/TRIM9	21
GO:0022406	Membrane docking	12/378	181/18862	0.00497729	AHI1/CCP110/CENPJ/CEP192/NDRG4/NEK2/PCNT/SNAP25/STX1A/STXBP1/TUBA1A/TUBB	12
GO:0007158	Neuron cell-cell adhesion	4/378	17/18862	0.00504131	CDK5R1/NLGN1/NLGN4X/NRXN1	4
GO:0051258	Protein polymerization	16/378	294/18862	0.00507201	ADD2/CDK5R1/CENPJ/CEP192/CYFIP2/FBXO5/MAP1B/MAP2/MAPT/OPA1/PSRC1/STMN1/STMN2/TUBGCP3/UBE2C/UBE2S	16
GO:0043087	Regulation of GTPase activity	22/378	487/18862	0.00573765	ADCYAP1/ARHGAP33/ARHGEF7/DEPDC1/DEPDC1B/DYNLT1/ECT2/EZH2/GDI1/HRAS/OCRL/PIN1/PTPRN2/RACGAP1/RGS17/RGS7/SH3BP4/STMN1/STMN3/STXBP5L/TBC1D24/TIAM1	22
GO:0051293	Establishment of spindle localization	6/378	48/18862	0.00595121	CENPA/DYNLT1/ESPL1/FMN2/NDC80/NUSAP1	6
GO:1901214	Regulation of neuron death	16/378	302/18862	0.00656587	ASCL1/BACE1/CDK5R1/CHGA/CITED1/FYN/FZD9/HRAS/ISL1/KIF14/MAPT/PARP1/PIN1/SARM1/STXBP1/TOX3	16
GO:0048588	Developmental cell growth	13/378	222/18862	0.00837042	AUTS2/CDK5R1/GDI1/KIAA0319/L1CAM/MAP1B/MAP2/MAPT/NRCAM/PIN1/RIMS2/SH3GL2/TIAM1	13
GO:0097711	Ciliary basal body-plasma membrane docking	8/378	95/18862	0.0092989	AHI1/CCP110/CENPJ/CEP192/NEK2/PCNT/TUBA1A/TUBB	8
GO:0051302	Regulation of cell division	11/378	171/18862	0.00983991	CCP110/E2F7/E2F8/ECT2/FGF9/FSD1/KIF14/KIF23/PIN1/PRC1/RACGAP1	11
GO:0048568	Embryonic organ development	19/378	412/18862	0.00997478	AHI1/CHD7/CITED1/DLX5/DLX6/E2F7/E2F8/KMT2A/MBD3/MYO3A/NDRG4/PBX3/POLE/SHOX2/SIX2/SIX3/SOX11/STIL/VANGL2	19
GO:0071709	Membrane assembly	5/378	36/18862	0.0100569	CDH2/NLGN1/NLGN4X/NRXN1/SYT11	5
GO:0090313	Regulation of protein targeting to membrane	5/378	36/18862	0.0100569	CACNB3/CDK5R1/FYN/GDI1/HRAS	5
GO:0048485	Sympathetic nervous system development	4/378	21/18862	0.0101738	ASCL1/INSM1/SOX11/SOX4	4
GO:0051402	Neuron apoptotic process	13/378	230/18862	0.0109777	ASCL1/BACE1/CDK5R1/CITED1/FYN/FZD9/HRAS/ISL1/KIF14/PARP1/PIN1/STXBP1/TOX3	13
GO:0019886	Antigen processing and presentation of exogenous peptide antigen via MHC class II	8/378	99/18862	0.011577	CENPE/KIF11/KIF15/KIF22/KIF23/KLC1/RACGAP1/SH3GL2	8
GO:0051098	Regulation of binding	17/378	357/18862	0.0126462	ADD2/ARHGEF7/CDT1/CRMP1/DHX9/E2F1/HMGB2/ISL1/MAP2/NEK2/PARP1/PIN1/SMAD4/SOX11/STMN1/TIAM1/ZFP90	17
GO:0042769	DNA damage response, detection of DNA damage	5/378	39/18862	0.0138643	DTL/PARP1/RFC4/SOX4/USP1	5
GO:0007389	Pattern specification process	19/378	426/18862	0.0138643	ACVR2A/AHI1/ASCL1/CELSR2/CITED1/DLL3/FOXA1/HES6/ISL1/NDRG4/PBX3/PGAP1/RELN/RIPPLY3/SIX2/SIX3/SMAD4/STIL/VANGL2	19
GO:0098930	Axonal transport	6/378	59/18862	0.0150666	AP3B2/KIF1A/KIF5C/MAP2/MAPT/OPA1	6
GO:0062149	Detection of stimulus involved in sensory perception of pain	4/378	24/18862	0.0158697	BACE1/CACNB3/FYN/MMP24	4
GO:2000177	Regulation of neural precursor cell proliferation	7/378	82/18862	0.0164514	ADCYAP1/ASCL1/CDH2/FZD9/INSM1/SIX3/TOX	7
GO:0044091	Membrane biogenesis	5/378	41/18862	0.0165649	CDH2/NLGN1/NLGN4X/NRXN1/SYT11	5
GO:0050890	Cognition	14/378	276/18862	0.0178757	ADCY1/CHD7/CNTNAP2/FEN1/FYN/FZD9/KCNK10/MAPT/NDRG4/NLGN4X/NRXN1/SLC1A4/SNAP25/SYT11	14
GO:0017156	Calcium-ion regulated exocytosis	6/378	63/18862	0.0196035	CADPS/RIMS2/STX1A/STXBP1/SYT11/TRIM9	6
GO:0046189	Phenol-containing compound biosynthetic process	5/378	43/18862	0.0196035	CITED1/DDC/GCH1/INSM1/TRPC1	5
GO:0006890	Retrograde vesicle-mediated transport, Golgi to endoplasmic reticulum	7/378	87/18862	0.0218196	CENPE/KIF11/KIF15/KIF22/KIF23/KLC1/RACGAP1	7
GO:0048469	Cell maturation	10/378	166/18862	0.0229667	ACTL6B/ASCL1/CNTNAP2/FBXO5/FOXA1/KIF14/NRCAM/OPA1/SIX3/TYMS	10
GO:0030705	Cytoskeleton-dependent intracellular transport	11/378	195/18862	0.0231738	AP3B2/IFT81/KIF1A/KIF5C/MAP1B/MAP2/MAPT/OPA1/TUBA1A/TUBA1B/TUBB	11
GO:0060560	Developmental growth involved in morphogenesis	12/378	225/18862	0.0235435	AUTS2/CDK5R1/GDI1/KIAA0319/L1CAM/MAP1B/MAP2/MAPT/NRCAM/RIMS2/SH3GL2/TIAM1	12
GO:0045023	G0 to G1 transition	5/378	47/18862	0.0273381	CDC7/E2F1/EZH2/RBBP8/TFDP1	5
GO:0050966	Detection of mechanical stimulus involved in sensory perception of pain	3/378	14/18862	0.0276988	BACE1/CACNB3/FYN	3
GO:0030534	Adult behavior	8/378	117/18862	0.0276988	ABAT/ADAM22/CHD7/CHRNA3/CNTNAP2/NLGN4X/NRXN1/SEZ6	8
GO:1902430	Negative regulation of amyloid-beta formation	4/378	29/18862	0.0281552	PIN1/RTN1/RTN2/RTN3	4
GO:0003208	Cardiac ventricle morphogenesis	6/378	69/18862	0.0284624	CHD7/CPE/ISL1/SMAD4/SOX11/SOX4	6
GO:0060041	Retina development in camera-type eye	9/378	145/18862	0.0288074	AHI1/CHD7/DCX/MDM1/OPA1/RRM1/SIX3/SMARCA4/TTLL5	9
GO:0032200	Telomere organization	10/378	174/18862	0.0298572	CCNE2/EXO1/FEN1/NEK2/PARP1/POLA1/POLE/POLE2/RFC4/TERF1	10
GO:0015837	Amine transport	7/378	94/18862	0.0306241	ARL6IP1/CHGA/CHRNA3/DDC/STX1A/STXBP1/SYT11	7
GO:0098727	Maintenance of cell number	9/378	148/18862	0.0321965	CDH2/ELAVL1/EZH2/FANCC/MMP24/SIX2/SMAD4/SOX4/ZNF706	9
GO:0043584	Nose development	3/378	15/18862	0.0321965	ASCL1/CHD7/DLX5	3
GO:0060391	Positive regulation of SMAD protein signal transduction	3/378	15/18862	0.0321965	KIAA0319/PARP1/SMAD4	3
GO:2000136	Regulation of cell proliferation involved in heart morphogenesis	3/378	15/18862	0.0321965	ISL1/PIM1/SMAD4	3
GO:0002790	Peptide secretion	17/378	401/18862	0.0333357	ADCYAP1/CACNA1A/CBLN1/CHD7/CHGA/GRP/ISL1/PCLO/PTPRN2/RIMS2/SCG2/SMPD3/SNAP25/SOX4/STX1A/STXBP5L/TIAM1	17
GO:0035176	Social behavior	5/378	50/18862	0.0333636	CNTNAP2/GAD1/GRP/NLGN4X/NRXN1	5
GO:0035270	Endocrine system development	8/378	122/18862	0.0334144	ADCYAP1/ASCL1/CDH2/INSM1/ISL1/ONECUT2/SIX3/SOX4	8
GO:0031345	Negative regulation of cell projection organization	10/378	180/18862	0.0359934	CBFA2T2/CCP110/CDK5R1/CRMP1/FYN/GDI1/KIAA0319/MAP2/NLGN1/STMN2	10
GO:0048311	Mitochondrion distribution	3/378	16/18862	0.0371634	ATCAY/MAPT/OPA1	3
GO:0048557	Embryonic digestive tract morphogenesis	3/378	16/18862	0.0371634	SHOX2/SIX2/SOX11	3
GO:0061548	Ganglion development	3/378	16/18862	0.0371634	ASCL1/INSM1/TUBB3	3
GO:0099558	Maintenance of synapse structure	3/378	16/18862	0.0371634	BSN/CBLN1/PCLO	3
GO:0043113	Receptor clustering	5/378	52/18862	0.0379299	CDH2/DLG3/FZD9/NLGN1/NRXN1	5
GO:0051703	Biological process involved in intraspecies interaction between organisms	5/378	52/18862	0.0379299	CNTNAP2/GAD1/GRP/NLGN4X/NRXN1	5
GO:0045926	Negative regulation of growth	12/378	245/18862	0.0402192	CDK5R1/CDKN1B/CDKN2A/CDKN2C/CDKN2D/GNG4/KIAA0319/MAP2/PSRC1/SH3BP4/SMAD4/SMARCA4	12
GO:0043547	Positive regulation of GTPase activity	17/378	411/18862	0.0402192	ADCYAP1/ARHGAP33/ARHGEF7/DEPDC1/DEPDC1B/ECT2/EZH2/GDI1/HRAS/OCRL/PIN1/RACGAP1/RGS17/RGS7/STXBP5L/TBC1D24/TIAM1	17
GO:0007215	Glutamate receptor signaling pathway	5/378	53/18862	0.0404528	CDK5R1/FYN/GRM2/GRM8/TIAM1	5
GO:0051447	Negative regulation of meiotic cell cycle	3/378	17/18862	0.0426386	FBXO43/FBXO5/TTK	3
GO:0071695	Anatomical structure maturation	11/378	218/18862	0.0446808	ACTL6B/ASCL1/CDK5R1/CNTNAP2/FBXO5/FOXA1/KIF14/NRCAM/OPA1/SIX3/TYMS	11
GO:0006475	Internal protein amino acid acetylation	9/378	160/18862	0.0479707	ACTL6B/AUTS2/ISL1/KMT2A/MAPT/MBD3/PAXIP1/RPS6KA5/SMAD4	9
GO:2001020	Regulation of response to DNA damage stimulus	11/378	221/18862	0.0488197	CDKN2D/DHX9/FBXO5/FMN2/MAPT/PARP1/PAXIP1/PMAIP1/THOC1/TIMELESS/USP1	11
GO:0033189	Response to vitamin A	3/378	18/18862	0.0489089	DNMT3B/MAP1B/TYMS	3
GO:0035493	SNARE complex assembly	3/378	18/18862	0.0489089	STX1A/STXBP1/TRIM9	3
GO:0051052	Regulation of DNA metabolic process	15/378	353/18862	0.0495159	CDT1/DHX9/FMN2/KMT2A/MBD3/NEK2/PARP1/PAXIP1/RFC4/TERF1/TFDP1/THOC1/TIMELESS/TOX/USP1	15

## Sheet: MF
ID	Description	GeneRatio	BgRatio	p.adjust	geneID	Count
GO:0015631	Tubulin binding	38/374	368/18337	1e-13	CDK5R1/CENPE/CENPF/CENPJ/DCX/EML5/FSD1/FYN/IFT81/JAKMIP2/KIF11/KIF14/KIF15/KIF1A/KIF22/KIF23/KIF5C/KIFC1/MAP1B/MAP2/MAPT/MAST1/MDM1/NUSAP1/OPA1/PRC1/PSRC1/RACGAP1/STMN1/STMN2/STMN3/SYT11/TERF1/TIAM1/TRIM36/TTLL5/TTLL7/TUBGCP3	38
GO:0140097	Catalytic activity, acting on DNA	22/374	204/18337	3.93e-08	CHD7/DHX9/DNMT1/DNMT3B/EXO1/FEN1/LIG1/MCM2/METTL4/NEIL3/PGBD5/POLA1/POLE/POLE2/RAD54L/RBBP8/REV3L/RFC4/TDP1/TERF1/TOP2A/UNG	22
GO:0003774	Motor activity	13/374	129/18337	0.000334439	CENPE/DYNLT1/KIF11/KIF14/KIF15/KIF1A/KIF22/KIF23/KIF5C/KIFC1/KLC1/MYO3A/PIN1	13
GO:0016538	Cyclin-dependent protein serine/threonine kinase regulator activity	8/374	50/18337	0.0007892	CCNA1/CCNE2/CDK5R1/CDKN1B/CDKN2A/CDKN2C/CDKN2D/MNAT1	8
GO:0003697	Single-stranded DNA binding	11/374	116/18337	0.00177833	DHX9/HMGB2/MAPT/MCM2/MYEF2/NEIL3/POLA1/RBBP8/SMC4/TDP1/TERF1	11
GO:0031490	Chromatin DNA binding	10/374	103/18337	0.00300466	DHX9/EZH2/HMGN2/INSM1/LEMD3/MBD3/SMARCA4/TOX/TOX3/ZIC2	10
GO:0004861	Cyclin-dependent protein serine/threonine kinase inhibitor activity	4/374	12/18337	0.00407961	CDKN1B/CDKN2A/CDKN2C/CDKN2D	4
GO:0000217	DNA secondary structure binding	6/374	36/18337	0.00407961	HMGB2/HMGB3/KMT2A/MAPT/NEIL3/RBBP8	6
GO:0035925	MRNA 3-UTR AU-rich region binding	5/374	24/18337	0.00494243	ELAVL1/ELAVL3/ELAVL4/ILF3/MEX3D	5
GO:0008301	DNA binding, bending	4/374	18/18337	0.0175555	HMGB2/HMGB3/TERF1/TOP2A	4
GO:0034061	DNA polymerase activity	5/374	36/18337	0.0269	POLA1/POLE/POLE2/REV3L/TERF1	5
GO:0004523	RNA-DNA hybrid ribonuclease activity	3/374	10/18337	0.0298539	EXO1/FEN1/RNASEH2A	3
GO:0005200	structural constituent of cytoskeleton	8/374	103/18337	0.0360753	ACTL6B/ADD2/INA/TUBA1A/TUBA1B/TUBB/TUBB3/TUBGCP3	8

## Sheet: KEGG
ID	Description	GeneRatio	BgRatio	p.adjust	geneID	Count
hsa04110	Cell cycle	20/179	126/8146	6.62262e-10	BUB3/CCNA1/CCNE2/CDC25C/CDC7/CDK2/CDKN1B/CDKN2A/CDKN2C/CDKN2D/E2F1/ESPL1/GADD45G/MCM2/PTTG1/RAD21/SMAD4/STAG2/TFDP1/TTK	20
hsa03030	DNA replication	8/179	36/8146	0.000102279	FEN1/LIG1/MCM2/POLA1/POLE/POLE2/RFC4/RNASEH2A	8
hsa03410	Base excision repair	7/179	33/8146	0.000475478	FEN1/LIG1/NEIL3/PARP1/POLE/POLE2/UNG	7
hsa05214	Glioma	8/179	75/8146	0.0117401	AKT3/CAMK1D/CAMK2B/CDKN2A/E2F1/GADD45G/HRAS/PIK3R3	8
hsa05220	Chronic myeloid leukemia	8/179	76/8146	0.0117401	AKT3/CDKN1B/CDKN2A/E2F1/GADD45G/HRAS/PIK3R3/SMAD4	8
hsa01522	Endocrine resistance	9/179	98/8146	0.0117401	ADCY1/AKT3/CDKN1B/CDKN2A/CDKN2C/DLL3/E2F1/HRAS/PIK3R3	9
hsa05166	Human T-cell leukemia virus 1 infection	14/179	222/8146	0.012838	ADCY1/AKT3/BUB3/CCNA1/CCNE2/CDK2/CDKN2A/CDKN2C/E2F1/ESPL1/HRAS/PIK3R3/PTTG1/SMAD4	14
hsa05226	Gastric cancer	11/179	149/8146	0.0129787	AKT3/CCNE2/CDK2/CDKN1B/E2F1/FGF9/FZD9/GADD45G/HRAS/PIK3R3/SMAD4	11
hsa04911	Insulin secretion	8/179	86/8146	0.0156445	ADCY1/ADCYAP1/CAMK2B/KCNMB2/PCLO/RIMS2/SNAP25/STX1A	8
hsa04210	Apoptosis	10/179	136/8146	0.0183333	AKT3/GADD45G/HRAS/LMNB1/LMNB2/PARP1/PIK3R3/PMAIP1/TUBA1A/TUBA1B	10
hsa04725	Cholinergic synapse	9/179	113/8146	0.0183333	ADCY1/AKT3/CACNA1A/CAMK2B/CHRNA3/FYN/GNG4/HRAS/PIK3R3	9
hsa05218	Melanoma	7/179	72/8146	0.0184039	AKT3/CDKN2A/E2F1/FGF9/GADD45G/HRAS/PIK3R3	7
hsa05223	Non-small cell lung cancer	7/179	72/8146	0.0184039	AKT3/CDKN2A/E2F1/GADD45G/HRAS/KIF5C/PIK3R3	7
hsa04514	Cell adhesion molecules	10/179	149/8146	0.028073	CADM1/CDH2/CNTNAP2/JAM3/L1CAM/NCAM1/NLGN1/NLGN4X/NRCAM/NRXN1	10
hsa04934	Cushing syndrome	10/179	155/8146	0.0351596	ADCY1/CAMK2B/CCNE2/CDK2/CDKN1B/CDKN2A/CDKN2C/E2F1/FZD9/KMT2A	10
hsa04114	Oocyte meiosis	9/179	131/8146	0.0356363	ADCY1/CAMK2B/CCNE2/CDC25C/CDK2/ESPL1/FBXO43/FBXO5/PTTG1	9
hsa05206	MicroRNAs in cancer	15/179	310/8146	0.048114	CCNE2/CDC25C/CDKN1B/CDKN2A/DNMT1/DNMT3B/E2F1/EZH2/HRAS/KIF23/PIK3R3/PIM1/RPS6KA5/SOX4/STMN1	15
hsa03420	Nucleotide excision repair	5/179	47/8146	0.048114	LIG1/MNAT1/POLE/POLE2/RFC4	5
hsa05225	Hepatocellular carcinoma	10/179	168/8146	0.0489281	ACTL6B/AKT3/CDKN2A/E2F1/FZD9/GADD45G/HRAS/PIK3R3/SMAD4/SMARCA4	10
hsa05222	Small cell lung cancer	7/179	92/8146	0.0489281	AKT3/CCNE2/CDK2/CDKN1B/E2F1/GADD45G/PIK3R3	7
hsa04550	Signaling pathways regulating pluripotency of stem cells	9/179	143/8146	0.0489281	ACVR2A/AKT3/DLX5/FZD9/HRAS/ID4/ISL1/PIK3R3/SMAD4	9
