# Supplementary material for: Clinical significance of cyclin-dependent kinase inhibitor 2C expression in cancers: from small cell lung carcinoma to pan-cancers
Source: BMC Pulm Med. 2022 Jun 24;22:246. doi: 10.1186/s12890-022-02036-5 (PMC9233395; doi:10.1186/s12890-022-02036-5)
Supplement: Supplementary file 5 — Additional file 5: All results of enrichment analyses of FOXA1 positively related Up-DEGs. [file 12890_2022_2036_MOESM5_ESM.xlsx]

## Sheet: Legend
Additional file 5. All results of enrichment analyses of FOXA1 positively related Up-DEGs.

## Sheet: CC
ID	Description	GeneRatio	BgRatio	pvalue	p.adjust	qvalue	geneID	Count
GO:0044295	Axonal growth cone	3/89	28/19520	0.000276376	0.0233557	0.0202885	DYNLT1/KIF5C/TIAM1	3
GO:0043025	Neuronal cell body	9/89	474/19520	0.0003098	0.0233557	0.0202885	ASCL1/CACNA1A/DYNLT1/KIF1A/KIF5C/PCSK2/SH3GL2/SYT11/TIAM1	9
GO:0150034	Distal axon	7/89	287/19520	0.000340131	0.0233557	0.0202885	CXADR/DPYSL3/DYNLT1/GAD1/KIF5C/SYT11/TIAM1	7
GO:0031234	Extrinsic component of cytoplasmic side of plasma membrane	4/89	100/19520	0.00113435	0.0454229	0.0394578	FARP1/GNG4/SYK/TIAM1	4
GO:0032009	Early phagosome	2/89	12/19520	0.00131696	0.0454229	0.0394578	SYK/SYT11	2
GO:0030427	Site of polarized growth	5/89	184/19520	0.0015435	0.0454229	0.0394578	CXADR/DPYSL3/DYNLT1/KIF5C/TIAM1	5
GO:0060077	Inhibitory synapse	2/89	14/19520	0.00180508	0.0464807	0.0403767	GAD1/SYT11	2

## Sheet: BP
ID	Description	GeneRatio	BgRatio	pvalue	p.adjust	qvalue	geneID	Count
GO:0002065	Columnar/cuboidal epithelial cell differentiation	6/87	82/18862	2.1384e-06	0.00384484	0.00338992	ASCL1/CBFA2T2/FOXA1/INSM1/PROX1/SOX4	6
GO:0045787	Positive regulation of cell cycle	10/87	395/18862	1.37918e-05	0.0123988	0.0109318	ASCL1/CDK2/CDKN1B/E2F7/ESPL1/FOXA1/INSM1/PROX1/SMPD3/SOX4	10
GO:0000082	G1/S transition of mitotic cell cycle	8/87	275/18862	3.98186e-05	0.0127985	0.0112842	CCNE2/CDK2/CDKN1B/CDKN2C/E2F7/NASP/NPAT/SOX4	8
GO:0043584	Nose development	3/87	15/18862	4.14317e-05	0.0127985	0.0112842	ASCL1/DLX5/PROX1	3
GO:0061351	Neural precursor cell proliferation	6/87	138/18862	4.27091e-05	0.0127985	0.0112842	ASCL1/INSM1/KIF1A/MELK/PROX1/TOX	6
GO:0044843	Cell cycle G1/S phase transition	8/87	298/18862	7.00488e-05	0.0156544	0.0138022	CCNE2/CDK2/CDKN1B/CDKN2C/E2F7/NASP/NPAT/SOX4	8
GO:2000179	Positive regulation of neural precursor cell proliferation	4/87	50/18862	8.26986e-05	0.0156544	0.0138022	ASCL1/INSM1/PROX1/TOX	4
GO:0046629	Gamma-delta T cell activation	3/87	19/18862	8.70656e-05	0.0156544	0.0138022	CXADR/SOX4/SYK	3
GO:0048485	Sympathetic nervous system development	3/87	21/18862	0.000118707	0.0158176	0.0139461	ASCL1/INSM1/SOX4	3
GO:0006977	DNA damage response, signal transduction by p53 class mediator resulting in cell cycle arrest	4/87	56/18862	0.000129143	0.0158176	0.0139461	CDK2/CDKN1B/E2F7/SOX4	4
GO:0072431	Signal transduction involved in mitotic G1 DNA damage checkpoint	4/87	57/18862	0.000138403	0.0158176	0.0139461	CDK2/CDKN1B/E2F7/SOX4	4
GO:1902400	Intracellular signal transduction involved in G1 DNA damage checkpoint	4/87	57/18862	0.000138403	0.0158176	0.0139461	CDK2/CDKN1B/E2F7/SOX4	4
GO:1902402	Signal transduction involved in mitotic DNA damage checkpoint	4/87	59/18862	0.000158352	0.0158176	0.0139461	CDK2/CDKN1B/E2F7/SOX4	4
GO:1902403	Signal transduction involved in mitotic DNA integrity checkpoint	4/87	59/18862	0.000158352	0.0158176	0.0139461	CDK2/CDKN1B/E2F7/SOX4	4
GO:0044783	G1 DNA damage checkpoint	4/87	63/18862	0.000204363	0.016702	0.0147259	CDK2/CDKN1B/E2F7/SOX4	4
GO:1902807	Negative regulation of cell cycle G1/S phase transition	5/87	124/18862	0.000272037	0.0203801	0.0179688	CDK2/CDKN1B/CDKN2C/E2F7/SOX4	5
GO:0023061	Signal release	9/87	475/18862	0.000340171	0.0240111	0.0211702	CACNA1A/GAD1/RAB11FIP3/RIMS2/SMPD3/SOX4/SYK/SYT11/TIAM1	9
GO:0010976	Positive regulation of neuron projection development	5/87	153/18862	0.000711933	0.0412921	0.0364065	CBFA2T2/DPYSL3/DYNLT1/TIAM1/TOX	5
GO:0051656	Establishment of organelle localization	8/87	431/18862	0.000841786	0.0458646	0.040438	DYNLT1/ESPL1/FNBP1L/KIF1A/KIF5C/SYK/SYT11/TRAPPC6B	8
GO:0045666	Positive regulation of neuron differentiation	4/87	94/18862	0.000938691	0.0496402	0.0437668	ASCL1/FOXA1/NRCAM/PROX1	4

## Sheet: MF
ID	Description	GeneRatio	BgRatio	pvalue	p.adjust	qvalue	geneID	Count
GO:0031490	Chromatin DNA binding	5/87	103/18337	0.000130061	0.0257522	0.023548	INSM1/LEMD3/SMARCC2/TOX/TOX3	5
GO:0030332	Cyclin binding	3/87	30/18337	0.000381755	0.0377938	0.0345589	CDK2/CDKN1B/INSM1	3

## Sheet: KEGG
ID	Description	GeneRatio	BgRatio	pvalue	p.adjust	qvalue	geneID	Count
hsa04110	Cell cycle	6/40	126/8146	3.03238e-05	0.00482149	0.0041815	CCNE2/CDK2/CDKN1B/CDKN2C/ESPL1/PTTG1	6
hsa05166	Human T-cell leukemia virus 1 infection	6/40	222/8146	0.000676659	0.0494184	0.0428588	CCNE2/CDK2/CDKN2C/ESPL1/PIK3R3/PTTG1	6
hsa05222	Small cell lung cancer	4/40	92/8146	0.00102041	0.0494184	0.0428588	CCNE2/CDK2/CDKN1B/PIK3R3	4
hsa05215	Prostate cancer	4/40	97/8146	0.00124323	0.0494184	0.0428588	CCNE2/CDK2/CDKN1B/PIK3R3	4
