# Supplementary material for: Clinical significance of cyclin-dependent kinase inhibitor 2C expression in cancers: from small cell lung carcinoma to pan-cancers
Source: BMC Pulm Med. 2022 Jun 24;22:246. doi: 10.1186/s12890-022-02036-5 (PMC9233395; doi:10.1186/s12890-022-02036-5)
Supplement: Supplementary file 6 — Additional file 6: All p-values of Wilcoxon rank-sum tests of CDKN2C expression levels between various types of cell lines. [file 12890_2022_2036_MOESM6_ESM.xlsx]

## Sheet: all_p
Additional file 6. All p-values of Wilcoxon rank-sum tests of CDKN2C expression levels between various types of cell lines.
	CESC	CHOL	COAD	ESCA	GBMLGG	HNSC	KIRC	LIHC	PAAD	PRAD	SCLC	STAD	THCA
CHOL	0.0290367	-	-	-	-	-	-	-	-	-	-	-	-
COAD	0.000417113	0.0104523	-	-	-	-	-	-	-	-	-	-	-
ESCA	0.026839	0.97664	0.0231015	-	-	-	-	-	-	-	-	-	-
GBMLGG	0.0614883	2.95549e-06	5.30739e-10	7.38586e-06	-	-	-	-	-	-	-	-	-
HNSC	0.000626514	0.126533	0.203811	0.110131	1.55966e-09	-	-	-	-	-	-	-	-
KIRC	0.991794	2.38067e-05	3.8276e-10	8.37729e-05	0.000634663	9.00441e-10	-	-	-	-	-	-	-
LIHC	0.529476	0.00996218	7.60144e-06	0.00908343	0.00248376	2.94452e-05	0.259849	-	-	-	-	-	-
PAAD	0.0126319	0.676951	0.000581295	0.655069	2.35633e-08	0.0102285	4.65606e-06	0.00793101	-	-	-	-	-
PRAD	0.0493839	0.780233	0.283534	0.864882	0.00268821	0.486906	0.00171376	0.0407939	0.706752	-	-	-	-
SCLC	0.000216852	3.96606e-12	2.88072e-19	1.90741e-11	0.00039939	6.07774e-18	2.68114e-07	1.30577e-06	3.29904e-15	1.25279e-05	-	-	-
STAD	0.0515029	0.45354	0.000880852	0.515281	7.21249e-06	0.00760835	0.000436176	0.0481294	0.72845	0.567224	5.63369e-12	-	-
THCA	0.853826	0.00298182	9.2111e-06	0.00348328	0.0746823	2.66626e-05	0.945747	0.490379	0.00311008	0.0105753	0.000361726	0.00968675	-
UCS	0.0975146	0.353228	0.000844712	0.319605	2.06708e-05	0.00820145	0.0033834	0.147224	0.406512	0.419377	7.12417e-11	0.726695	0.048368
Notes: All p-values in this table are based on the wilcoxon rank-sum tests between two types of cancer lines (e.g., CESC vs. CHOL).
