# Supplementary material for: Clinical significance of cyclin-dependent kinase inhibitor 2C expression in cancers: from small cell lung carcinoma to pan-cancers
Source: BMC Pulm Med. 2022 Jun 24;22:246. doi: 10.1186/s12890-022-02036-5 (PMC9233395; doi:10.1186/s12890-022-02036-5)
Supplement: Supplementary file 7 — Additional file 7: Multivariate Cox regression analysis for detecting the independent prognosis significance of CDKN2C in pan-cancer. [file 12890_2022_2036_MOESM7_ESM.xlsx]

## Sheet: Sheet1
Additional file 7. Multivariate Cox regression analysis for detecting the independent prognosis significance of CDKN2C in pan-cancer.
Survival category	Cancer	Parameter	HR	95% CI of HR		p-value		Survival category	Cancer	Parameter	HR	95% CI of HR		p-value
OS	CESC	CDKN2C expression	0.809	0.679	0.964	0.018		DFI	LGG	CDKN2C expression	1.521	1.061	2.183	0.023
		Age_in_year (≥65 vs. <65)	2.234	1.278	3.903	0.005				Age_in_year (≥65 vs. <65)	7.662	2.091	28.075	0.002
	HNSCC	CDKN2C expression	0.927	0.809	1.062	0.272				Gender (Male vs. Female)	1.033	0.425	2.514	0.943
		AJCC_stage (III-IV vs. I-II)	1.95	1.311	2.903	0.001			LIHC	CDKN2C expression	1.194	1.03	1.383	0.018
		Age_in_year (≥65 vs. <65)	1.434	1.065	1.93	0.018				AJCC_stage (III-IV vs. I-II)	2.264	1.545	3.317	<0.001
	KICH	CDKN2C expression	5.285	2.114	13.211	<0.001				Age_in_year (≥65 vs. <65)	1.298	0.901	1.869	0.161
		AJCC_stage (III-IV vs. I-II)	56.594	4.134	774.753	0.003				Gender (Male vs. Female)	1.228	0.844	1.788	0.284
		Age_in_year (≥65 vs. <65)	0.897	0.134	5.98	0.91		PFI	ACC	CDKN2C expression	1.239	0.932	1.648	0.14
		Gender (Male vs. Female)	0.689	0.11	4.331	0.691				AJCC_stage (III-IV vs. I-II)	4.083	2.027	8.225	<0.001
	LGG	CDKN2C expression	1.783	1.542	2.062	<0.001				Age_in_year (≥65 vs. <65)	1.715	0.741	3.969	0.208
		Age_in_year (≥65 vs. <65)	3.986	2.37	6.704	<0.001				Gender (Male vs. Female)	0.598	0.304	1.178	0.137
		Gender (Male vs. Female)	1.176	0.815	1.696	0.386			HNSCC	CDKN2C expression	0.883	0.765	1.02	0.091
	KIRP	CDKN2C expression	1.198	0.912	1.573	0.195				AJCC_stage (III-IV vs. I-II)	1.823	1.201	2.767	0.005
		AJCC_stage (III-IV vs. I-II)	5.549	2.823	10.909	<0.001				Age_in_year (≥65 vs. <65)	1.291	0.944	1.766	0.11
		Age_in_year (≥65 vs. <65)	0.882	0.463	1.679	0.702				Gender (Male vs. Female)	1.015	0.716	1.438	0.935
		Gender (Male vs. Female)	0.709	0.348	1.443	0.343			KICH	CDKN2C expression	5.466	2.409	12.401	<0.001
	MESO	CDKN2C expression	1.628	1.261	2.103	<0.001				AJCC_stage (III-IV vs. I-II)	38.981	5.413	280.726	<0.001
		AJCC_stage (III-IV vs. I-II)	0.749	0.427	1.314	0.314				Age_in_year (≥65 vs. <65)	0.894	0.145	5.523	0.904
		Age_in_year (≥65 vs. <65)	1.522	0.944	2.454	0.085				Gender (Male vs. Female)	0.247	0.044	1.385	0.112
		Gender (Male vs. Female)	0.686	0.366	1.283	0.238			KIRP	CDKN2C expression	1.191	0.944	1.503	0.14
	THYM	CDKN2C expression	0.574	0.338	0.976	0.04				AJCC_stage (III-IV vs. I-II)	7.018	3.875	12.712	<0.001
		Age_in_year (≥65 vs. <65)	1.43	0.282	7.263	0.666				Age_in_year (≥65 vs. <65)	0.83	0.469	1.468	0.522
		Gender (Male vs. Female)	0.483	0.113	2.072	0.327				Gender (Male vs. Female)	0.563	0.31	1.024	0.06
	UVM	CDKN2C expression	2.875	1.389	5.948	0.004			LGG	CDKN2C expression	1.525	1.368	1.701	<0.001
		AJCC_stage (III-IV vs. I-II)	1.155	0.45	2.965	0.764				Age_in_year (≥65 vs. <65)	2.22	1.41	3.495	0.001
		Age_in_year (≥65 vs. <65)	2.164	0.886	5.288	0.09				Gender (Male vs. Female)	0.9	0.674	1.202	0.475
		Gender (Male vs. Female)	1.203	0.478	3.03	0.694			LIHC	CDKN2C expression	1.151	1.008	1.315	0.038
DSS	CESC	CDKN2C expression	0.8	0.658	0.972	0.025				AJCC_stage (III-IV vs. I-II)	2.075	1.483	2.903	<0.001
		Age_in_year (≥65 vs. <65)	2.401	1.285	4.486	0.006				Age_in_year (≥65 vs. <65)	0.972	0.703	1.343	0.861
	HNSCC	CDKN2C expression	0.861	0.719	1.032	0.105				Gender (Male vs. Female)	0.98	0.706	1.36	0.902
		AJCC_stage (III-IV vs. I-II)	2.26	1.284	3.979	0.005			MESO	CDKN2C expression	1.712	1.29	2.272	<0.001
		Age_in_year (≥65 vs. <65)	1.214	0.82	1.797	0.332				AJCC_stage (III-IV vs. I-II)	0.523	0.286	0.956	0.035
		Gender (Male vs. Female)	0.946	0.613	1.461	0.804				Age_in_year (≥65 vs. <65)	1.382	0.817	2.337	0.227
	KICH	CDKN2C expression	91692.8	0.019	4.32651e+11	0.145				Gender (Male vs. Female)	0.315	0.157	0.634	0.001
		AJCC_stage (III-IV vs. I-II)	1106860117454930	<0.001	4.93552e+35	0.153			PRAD	CDKN2C expression	1.562	1.208	2.019	0.001
		Age_in_year (≥65 vs. <65)	0.531	0.001	304.78	0.845				Age_in_year (≥65 vs. <65)	0.919	0.589	1.433	0.708
		Gender (Male vs. Female)	1.608	0.002	1093.35	0.886			UVM	CDKN2C expression	3.594	1.845	7	<0.001
	KIRP	CDKN2C expression	1.262	0.905	1.76	0.17				AJCC_stage (III-IV vs. I-II)	1.231	0.553	2.738	0.611
		AJCC_stage (III-IV vs. I-II)	35.666	8.308	153.122	<0.001				Age_in_year (≥65 vs. <65)	1.243	0.566	2.732	0.588
		Age_in_year (≥65 vs. <65)	0.434	0.18	1.047	0.063				Gender (Male vs. Female)	0.675	0.313	1.455	0.316
		Gender (Male vs. Female)	0.628	0.275	1.433	0.269
	LGG	CDKN2C expression	1.834	1.58	2.13	<0.001
		Age_in_year (≥65 vs. <65)	3.948	2.241	6.955	<0.001
		Gender (Male vs. Female)	1.186	0.807	1.742	0.385
	LUSC	CDKN2C expression	0.742	0.547	1.005	0.054
		AJCC_stage (III-IV vs. I-II)	2.553	1.615	4.036	<0.001
		Age_in_year (≥65 vs. <65)	0.984	0.631	1.533	0.942
		Gender (Male vs. Female)	1.239	0.73	2.105	0.428
	MESO	CDKN2C expression	2.679	1.8	3.988	<0.001
		AJCC_stage (III-IV vs. I-II)	0.591	0.287	1.215	0.153
		Age_in_year (≥65 vs. <65)	1.403	0.746	2.638	0.294
		Gender (Male vs. Female)	0.592	0.282	1.245	0.167
	READ	CDKN2C expression	5.773	0.89	37.436	0.066
		AJCC_stage (III-IV vs. I-II)	3.53216e+09	<0.001	Infinite	0.999
		Age_in_year (≥65 vs. <65)	1.938	0.173	21.689	0.591
		Gender (Male vs. Female)	1.047	0.121	9.045	0.967
	THCA	CDKN2C expression	0.396	0.129	1.217	0.106
		AJCC_stage (III-IV vs. I-II)	4.739	0.447	50.204	0.196
		Age_in_year (≥65 vs. <65)	6.288	0.999	39.563	0.05
		Gender (Male vs. Female)	3.832	0.705	20.829	0.12
	UVM	CDKN2C expression	3.407	1.531	7.583	0.003
		AJCC_stage (III-IV vs. I-II)	1.248	0.46	3.385	0.663
		Age_in_year (≥65 vs. <65)	1.901	0.748	4.83	0.177
		Gender (Male vs. Female)	1.054	0.409	2.712	0.914
Notes: AJCC, American Joint Committee on Cancer.
